# Supplementary material
Source: PubMed Central journal article supplement (PMC2993851)

# Supporting Information

for

## Four Antiproliferative Diphenylpropanes and a Cyclohepta-dibenzofuran from *Bussea sakalava* from the Madagascar Dry Forest

Ende Pan, Liva Harinantanaina, Peggy J. Brodie, James S. Miller, Martin W. Callmander, Stephan Rakotonandrasana, Etienne Rakotobe, Vincent E. Rasamison, and David G. I. Kingston

*Department of Chemistry, M/C 0212, Virginia Polytechnic Institute and State University, Blacksburg, Virginia 24061, Missouri Botanical Garden, P. O. Box 299, St. Louis, Missouri 63166-0299, Missouri Botanical Garden, B. P. 3391, Antananarivo 101, Madagascar and Centre National d'Application et Recherches Pharmaceutiques, B. P. 702, Antananarivo 101, Madagascar*

### Contents

<sup>1</sup>H, <sup>13</sup>C, COSY, HMBC, HMQC, and NOESY spectra of bussealins A-E (1-5).

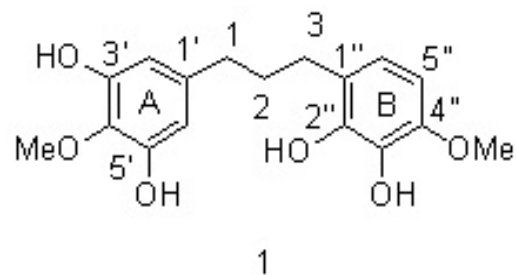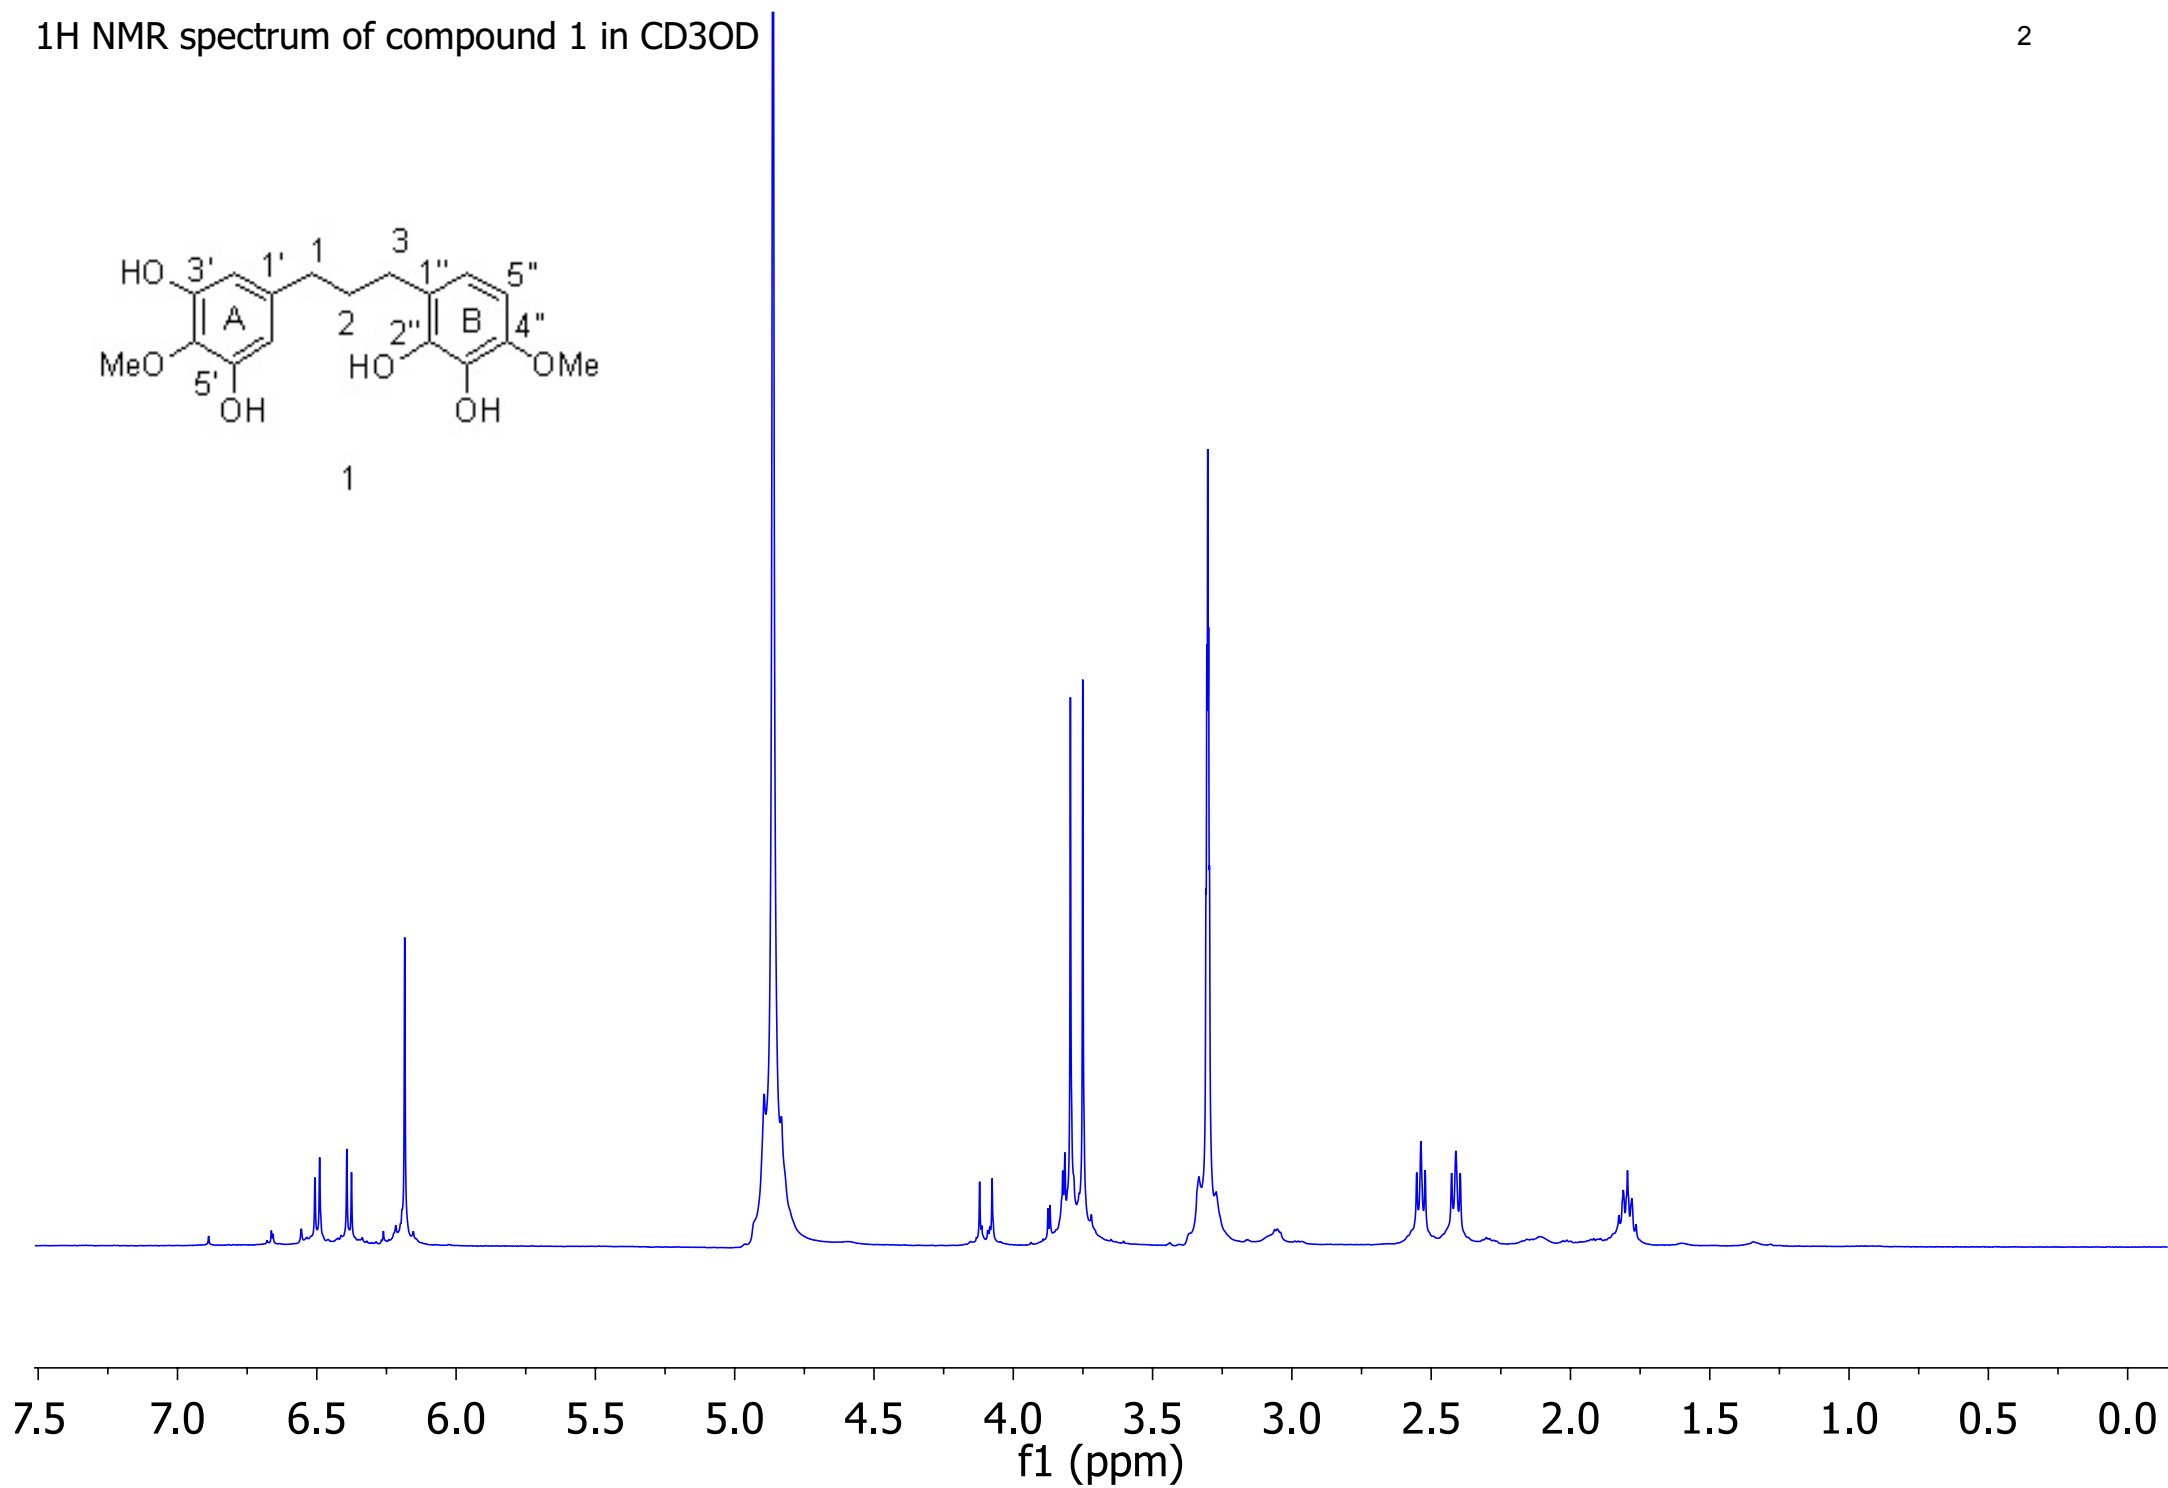

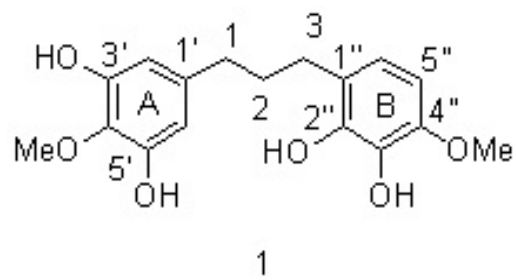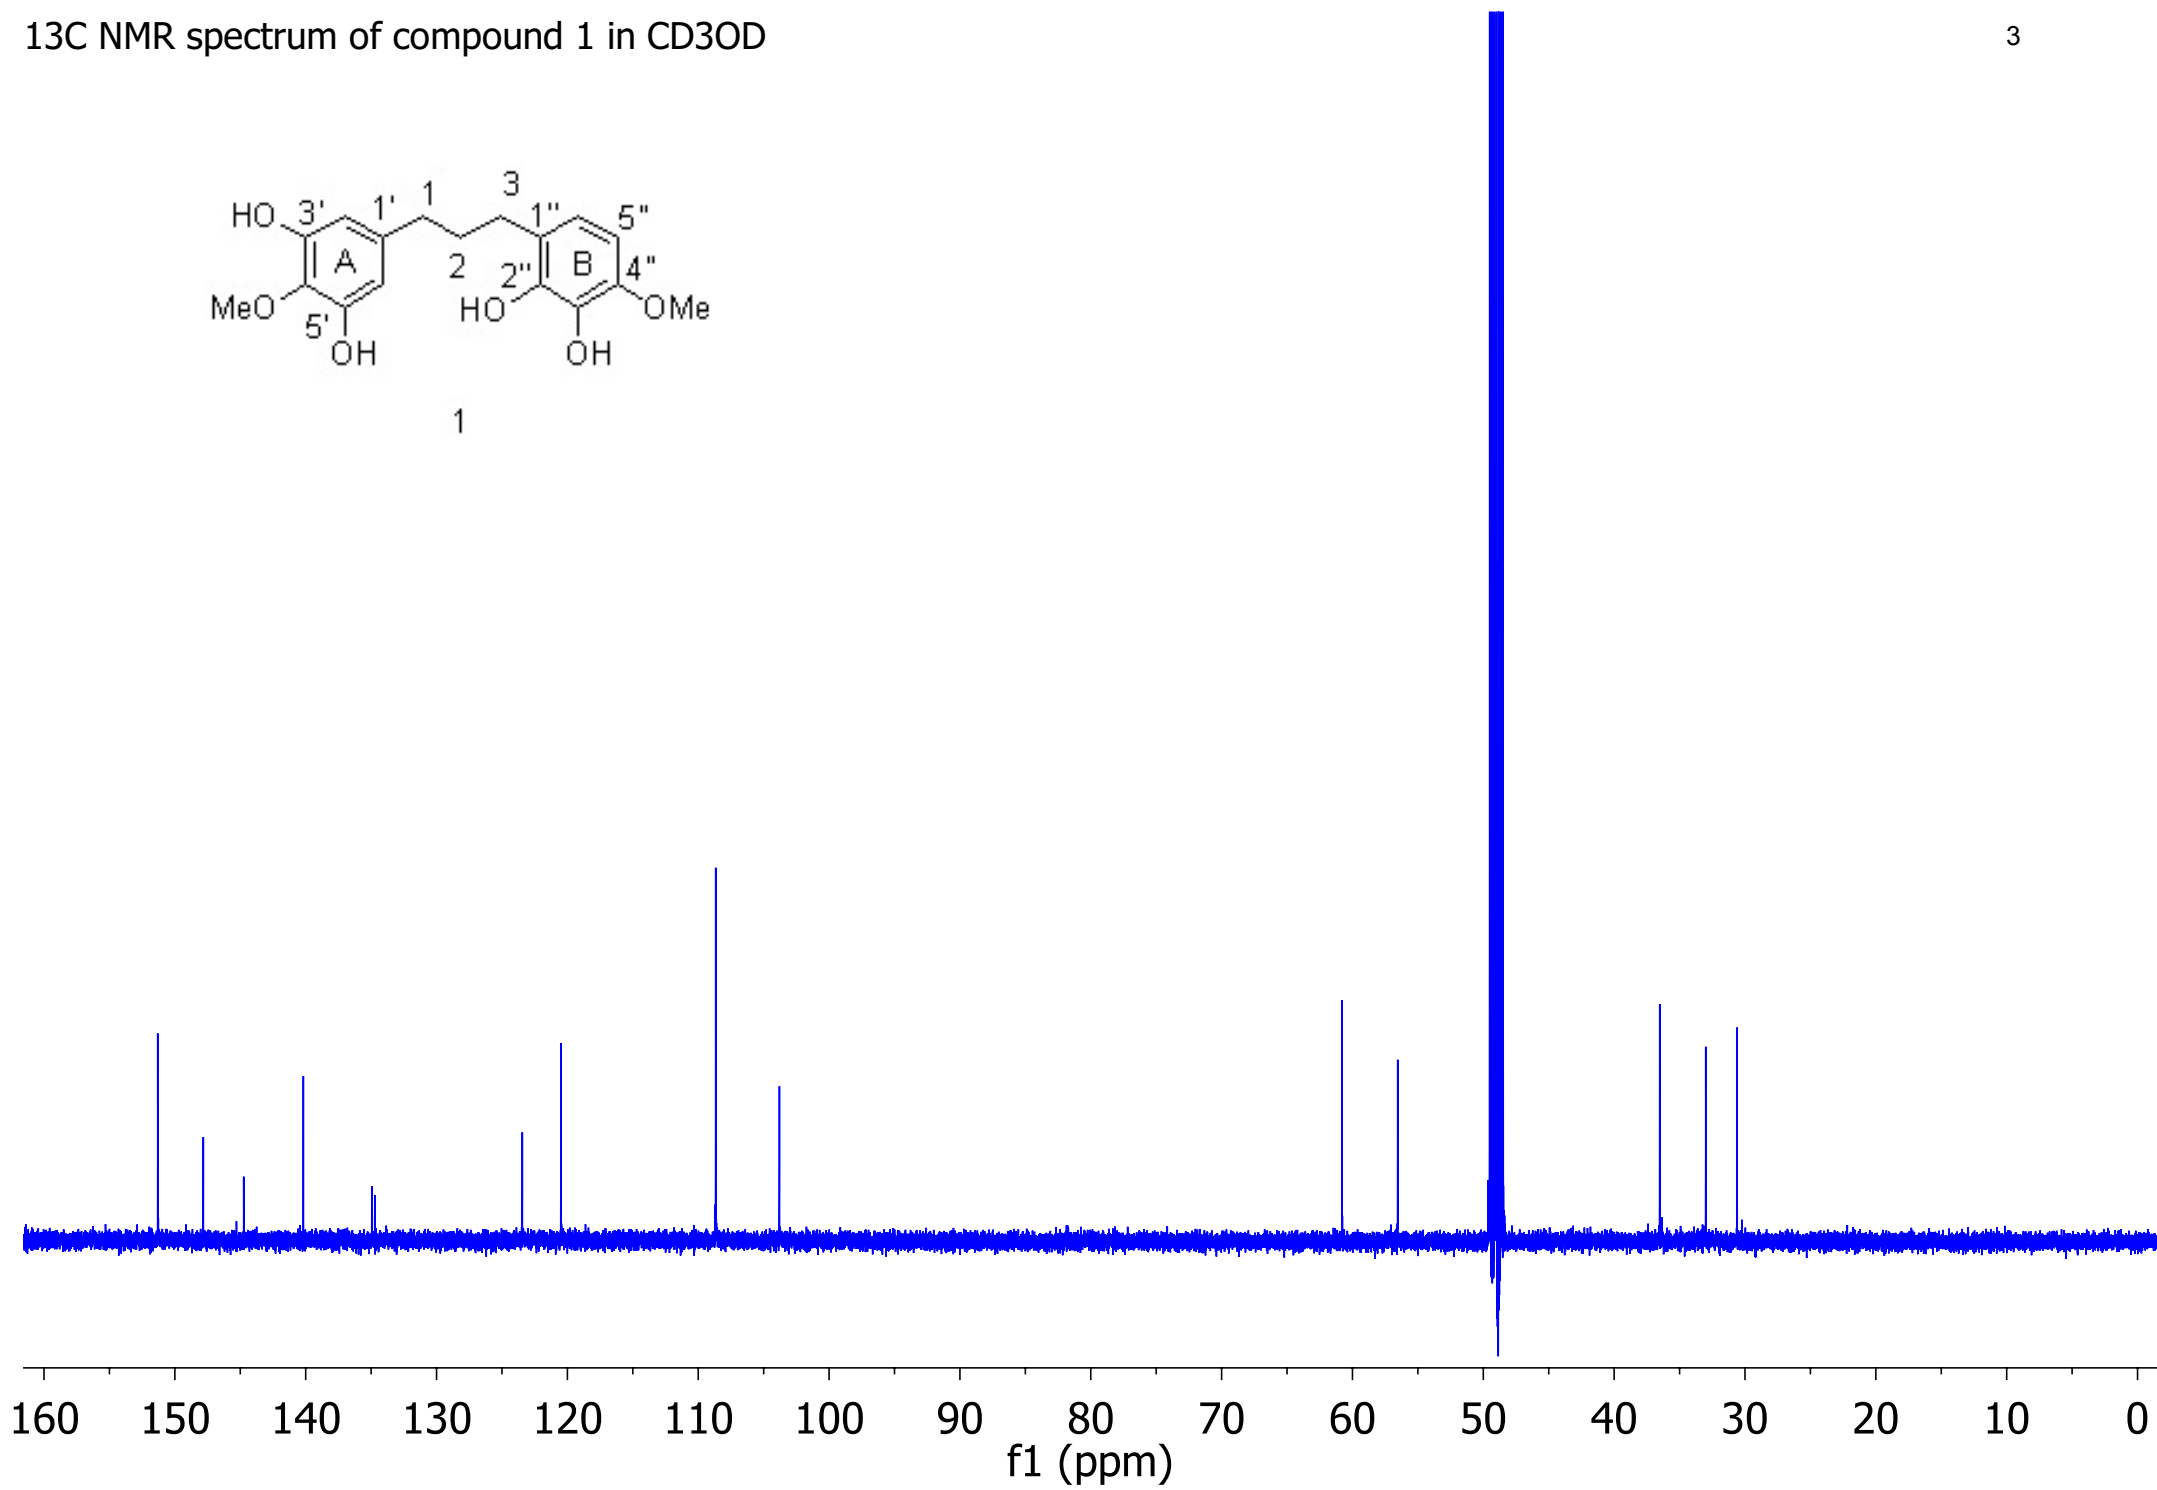

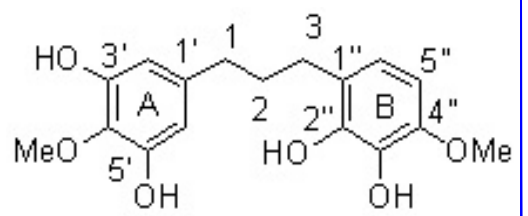

1

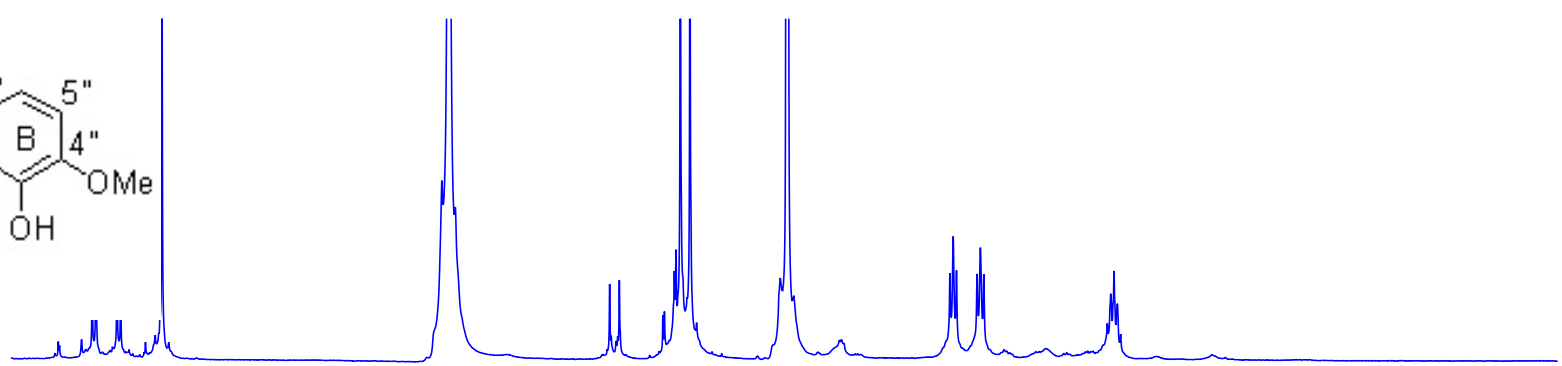

COSY spectrum of compound 1 in CD3OD

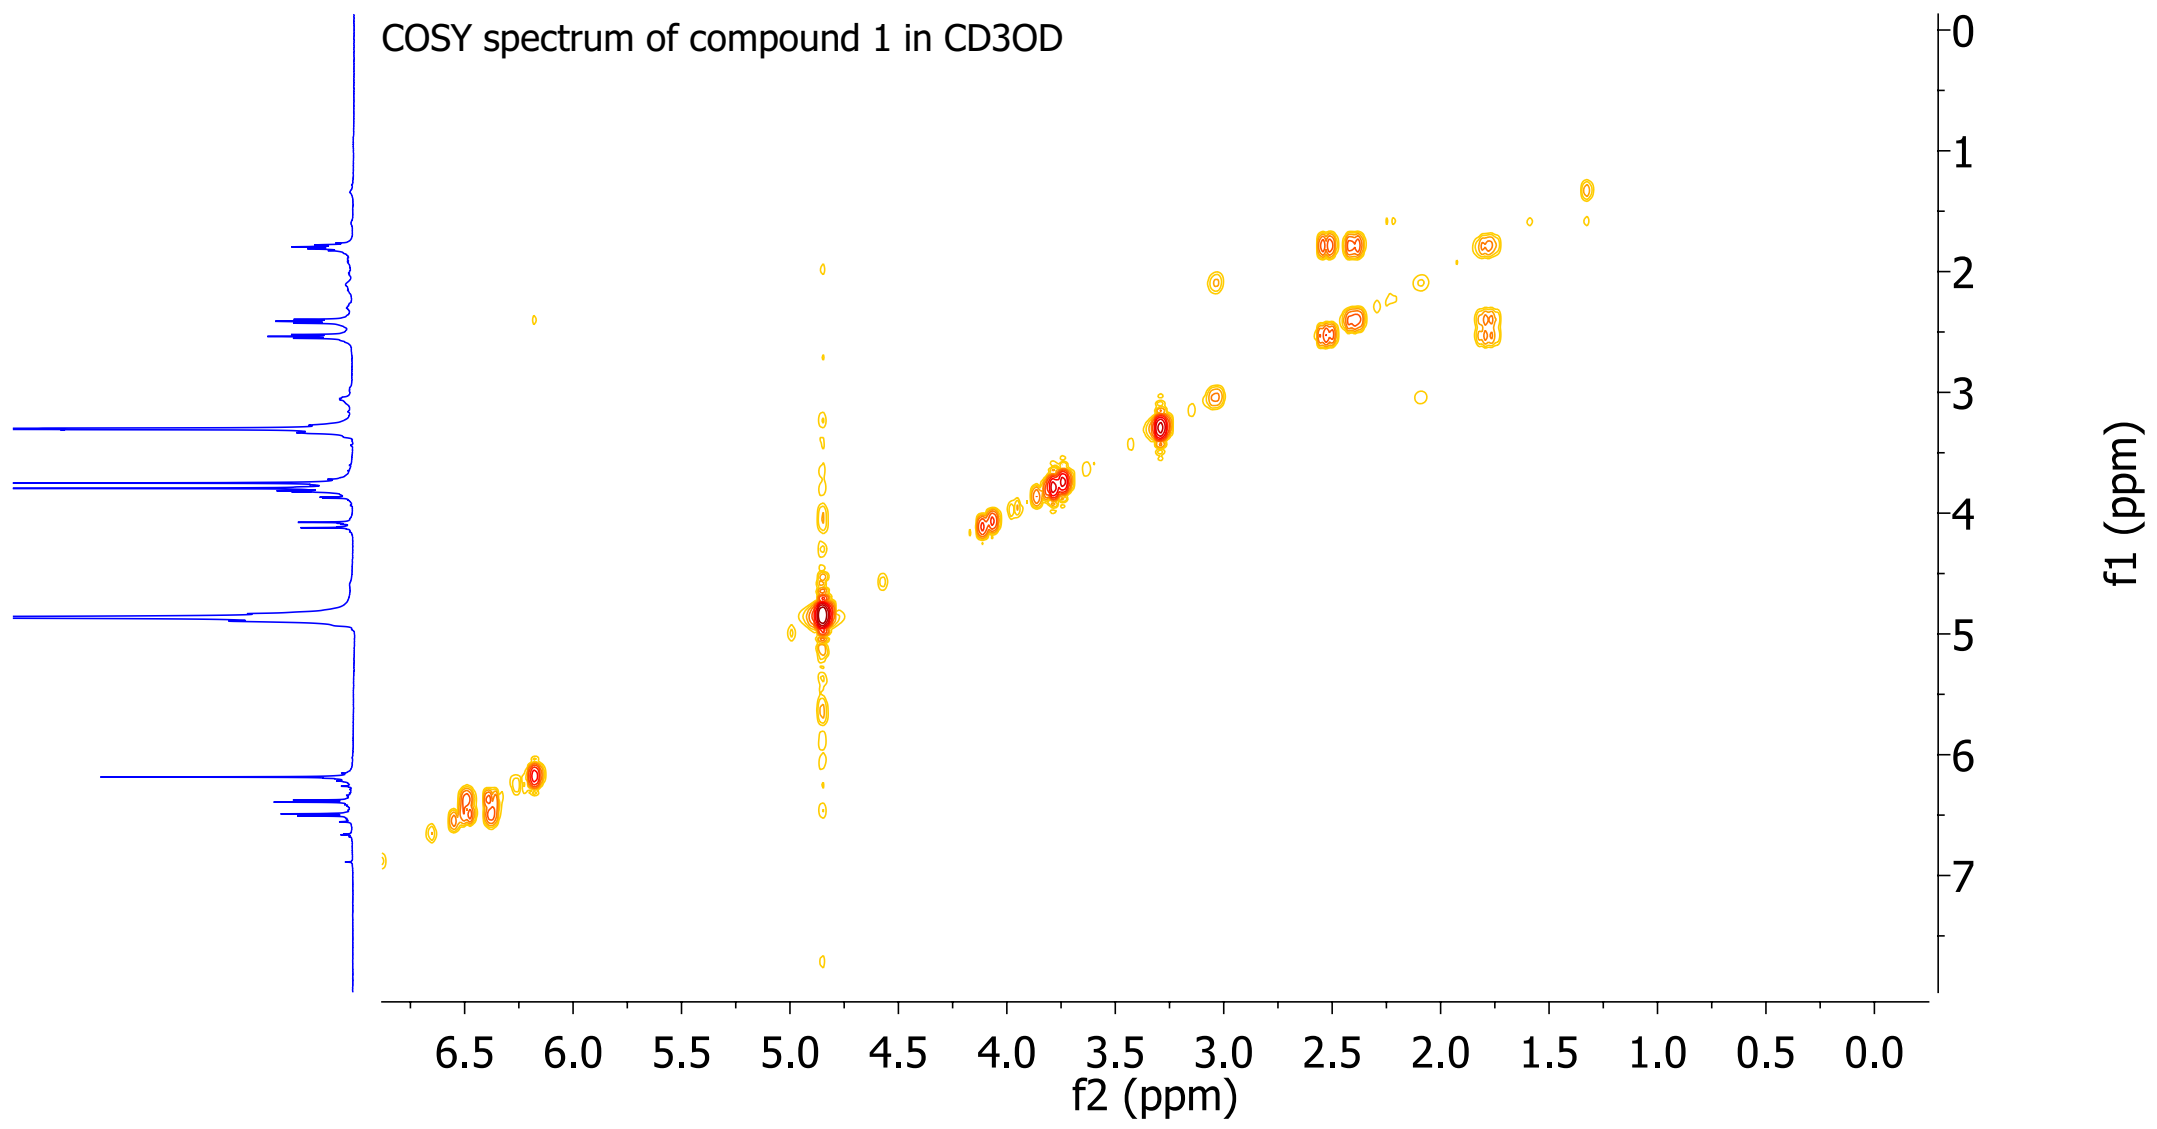

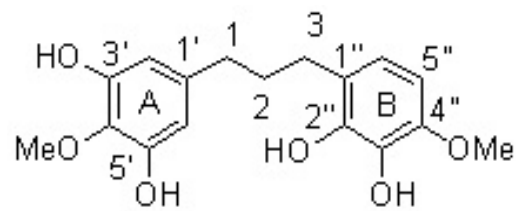

1

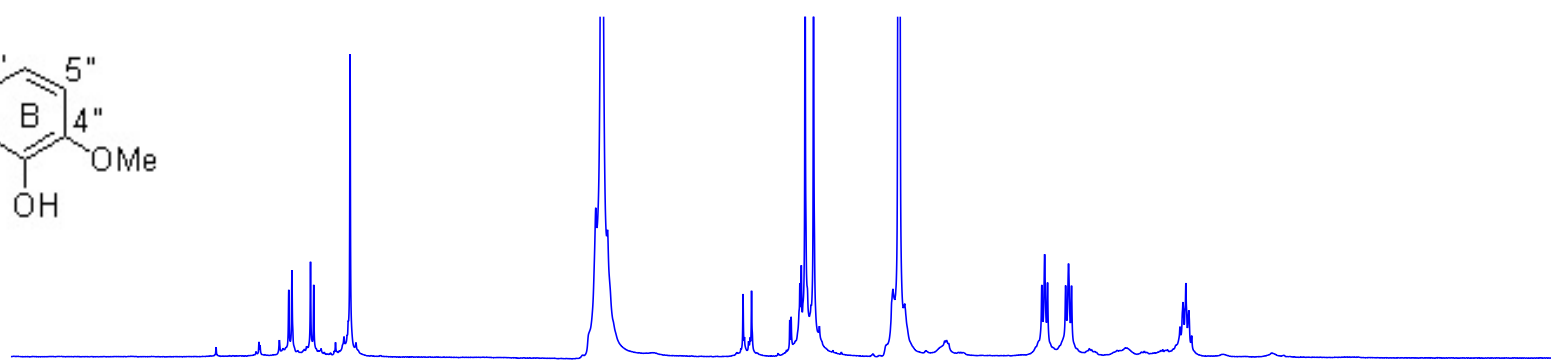

HMQC spectrum of compound 1 in CD3OD

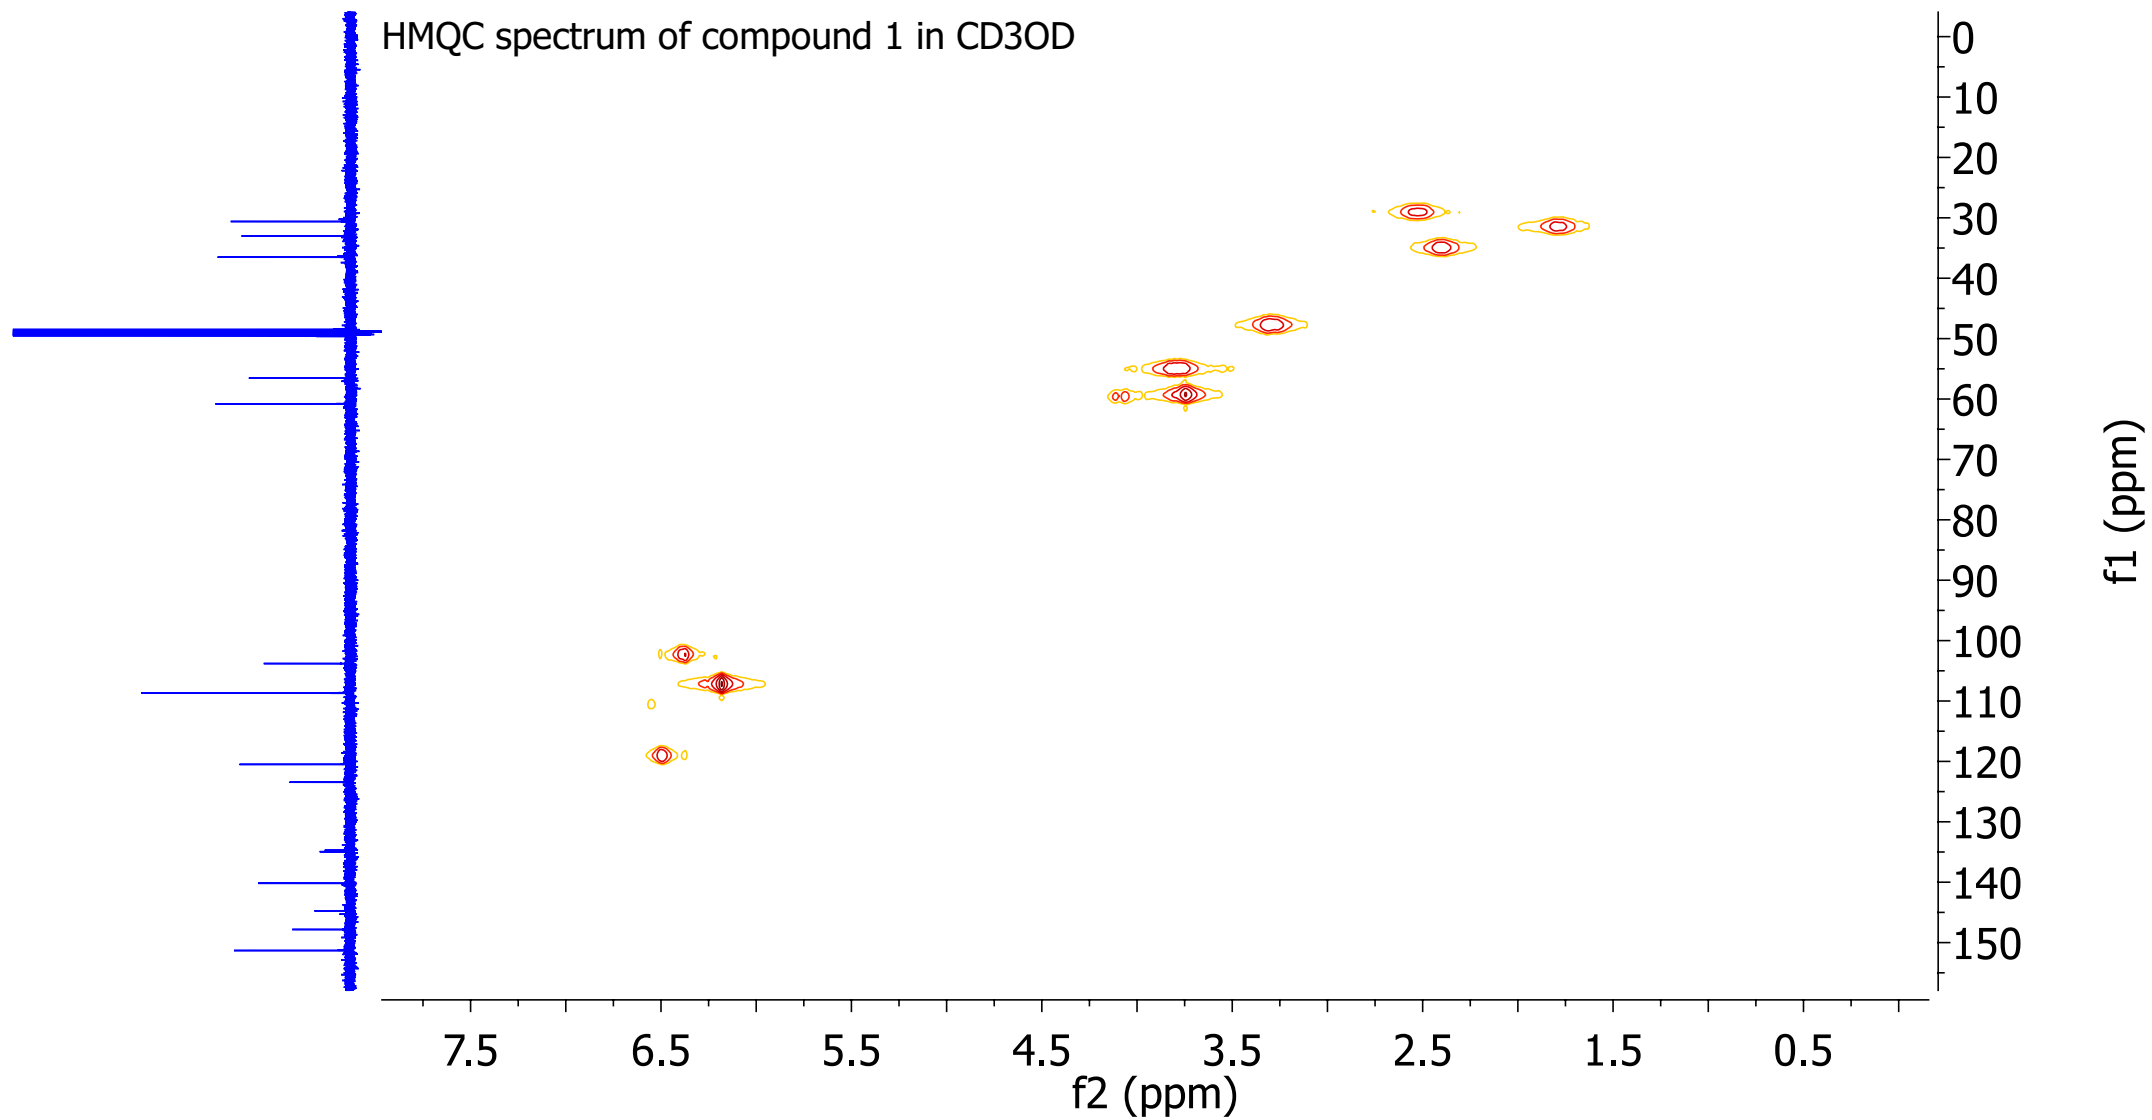

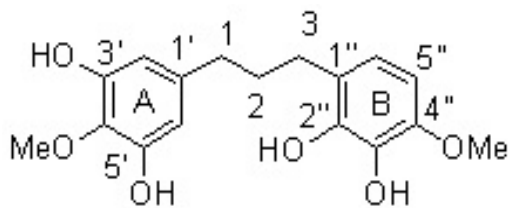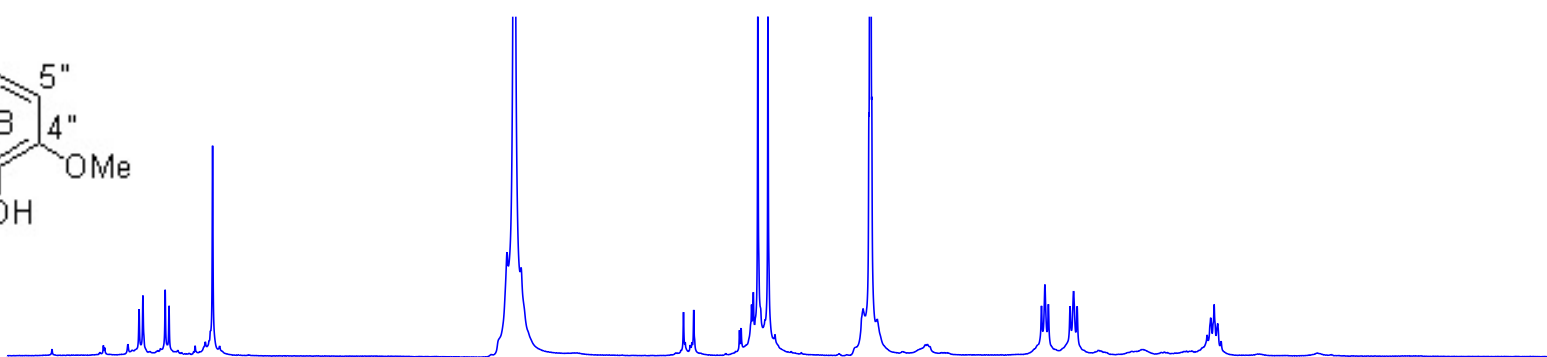HMBC spectrum of compound 1 in CD<sub>3</sub>OD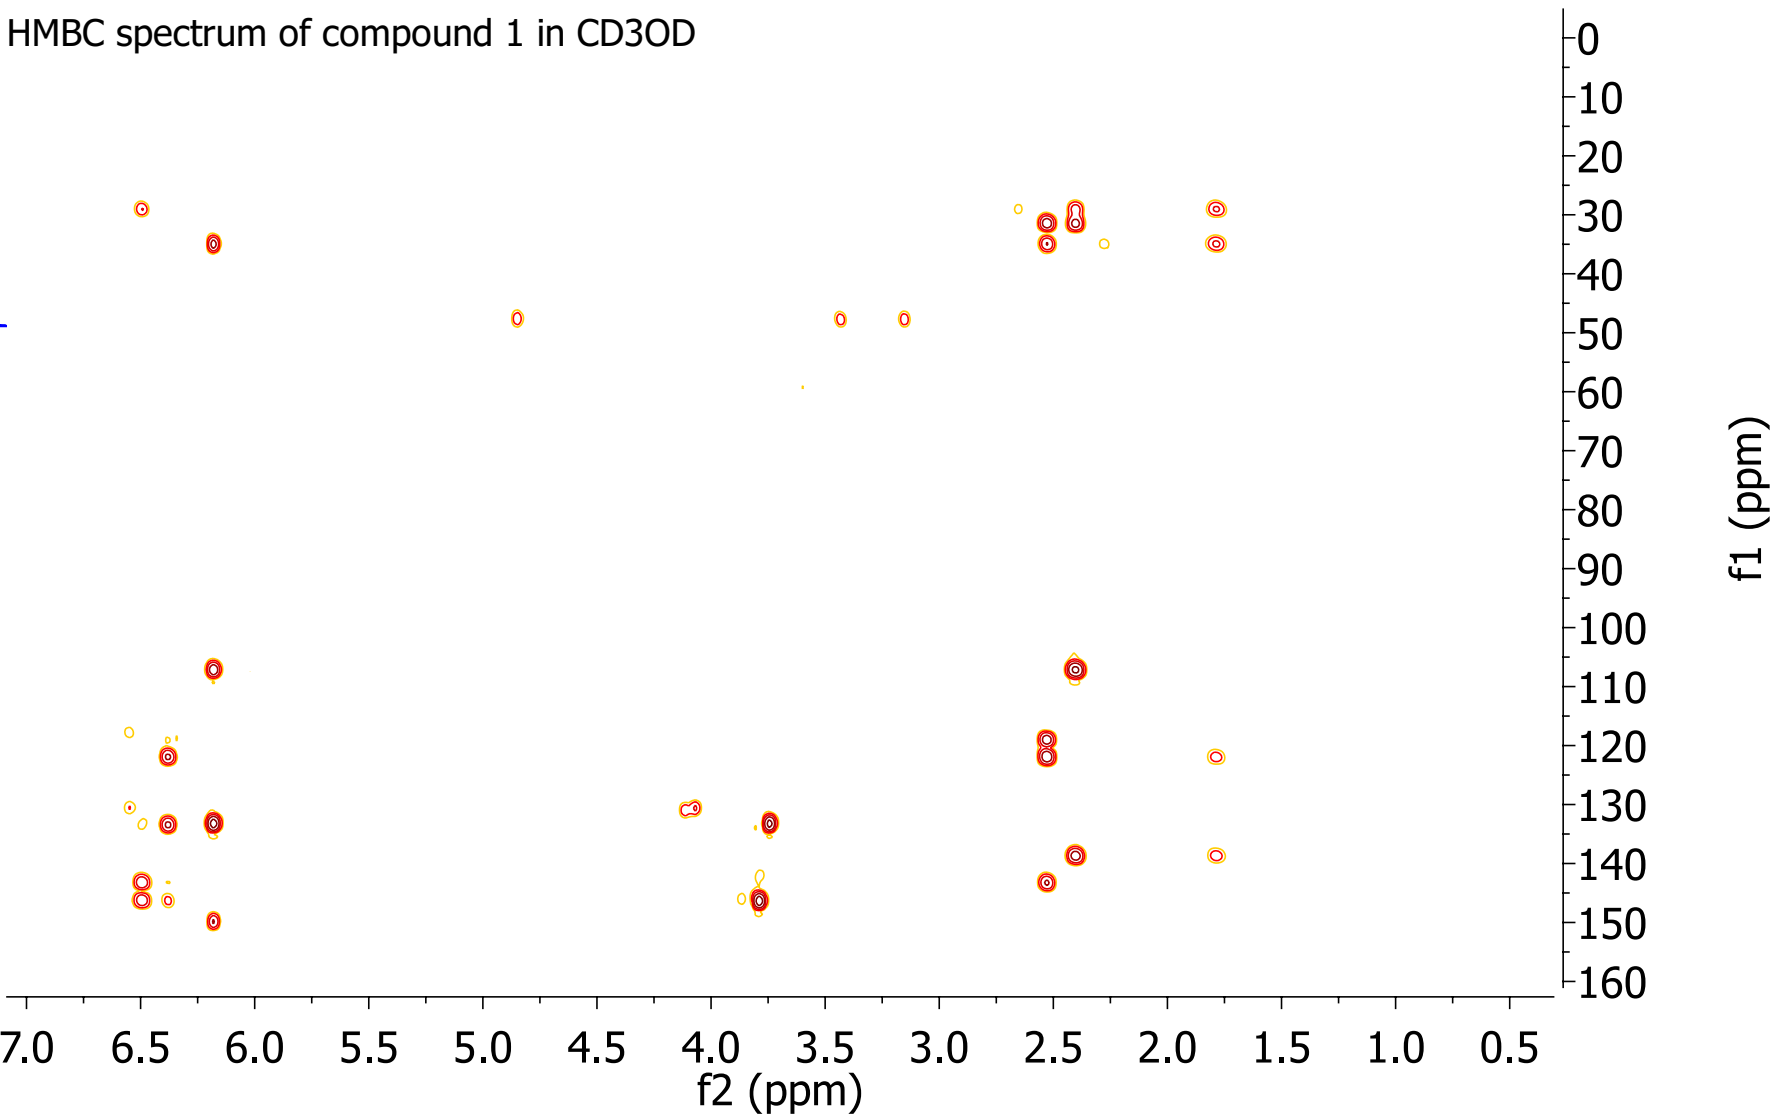

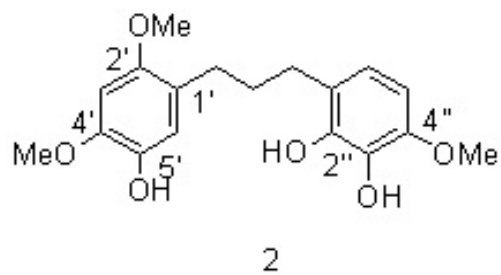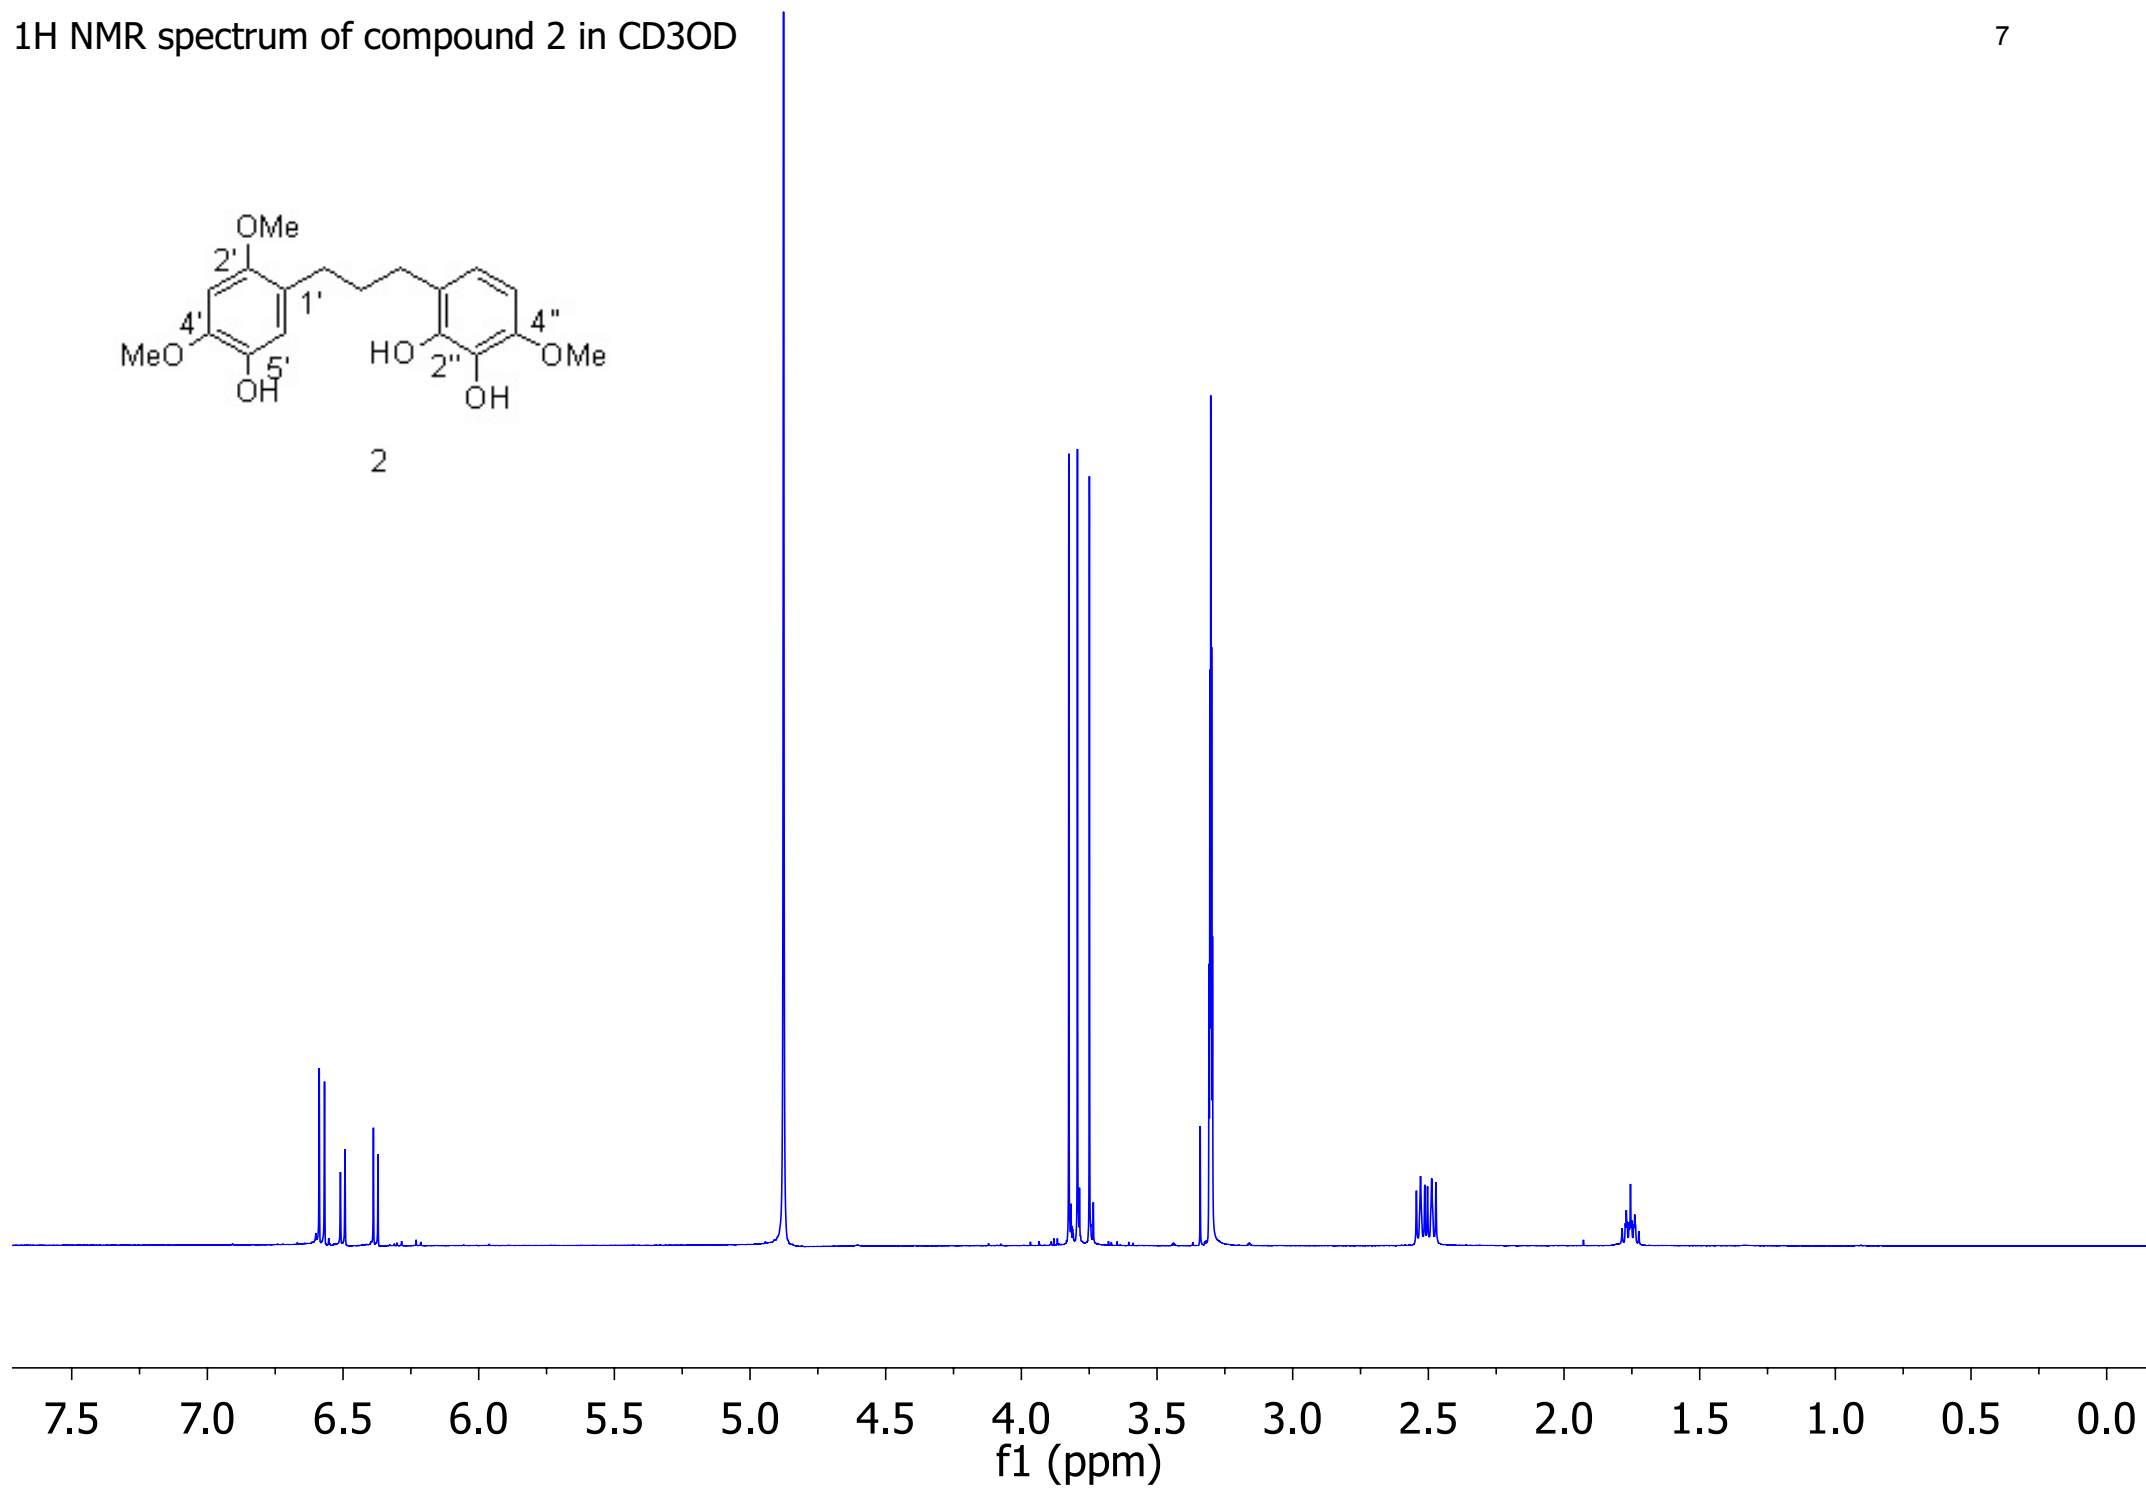

<sup>13</sup>C NMR spectrum of 2 in CD<sub>3</sub>OD

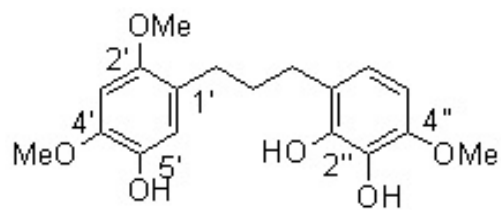

2

152.227  
147.765  
147.154  
144.722  
140.955  
134.941  
124.697  
123.706  
120.397  
117.860  
103.827  
99.382

56.843  
56.560

32.870  
31.909  
30.723  
30.380

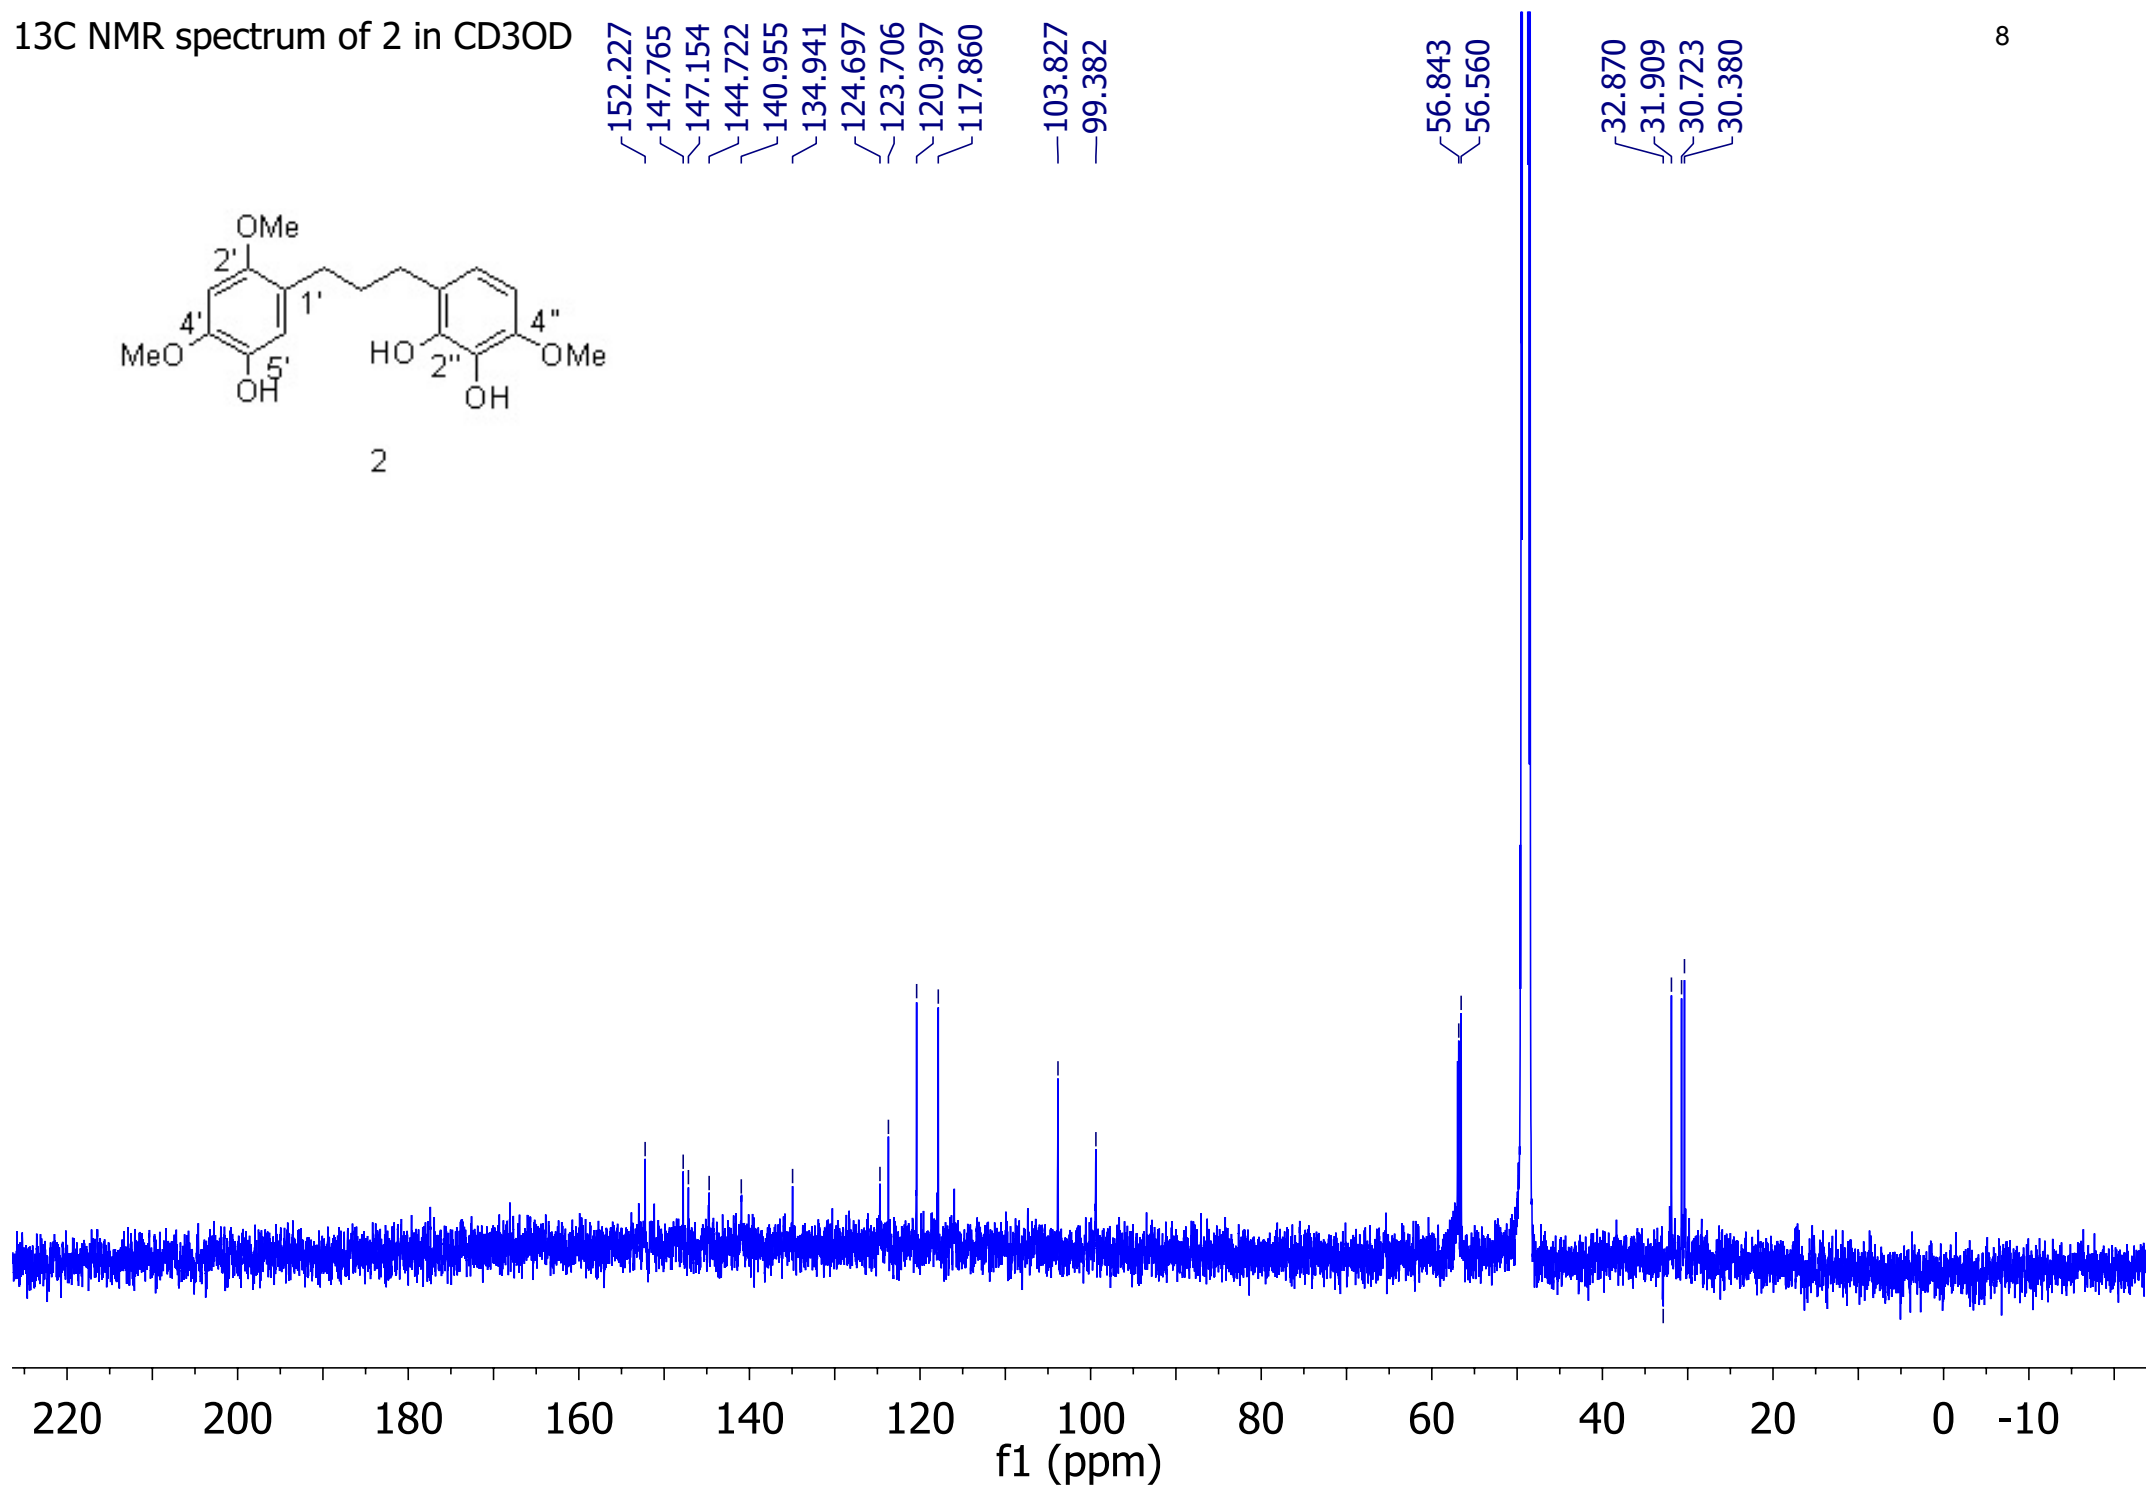



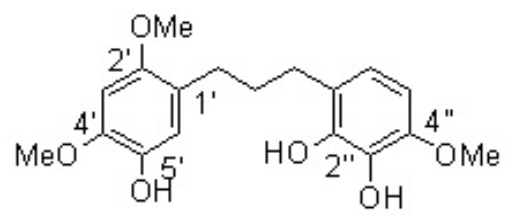

2

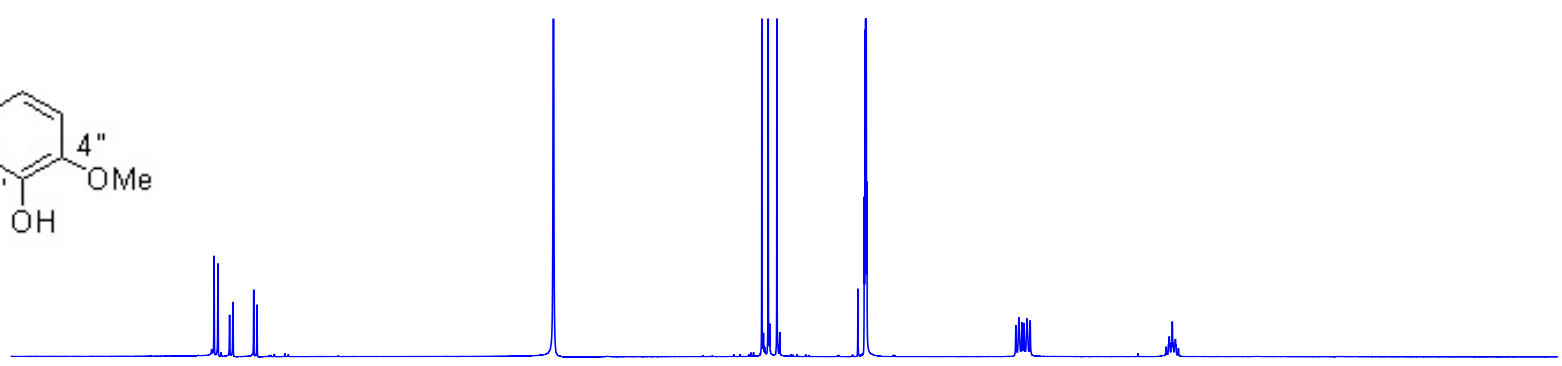

COSY spectrum of compound 2 in CD3OD

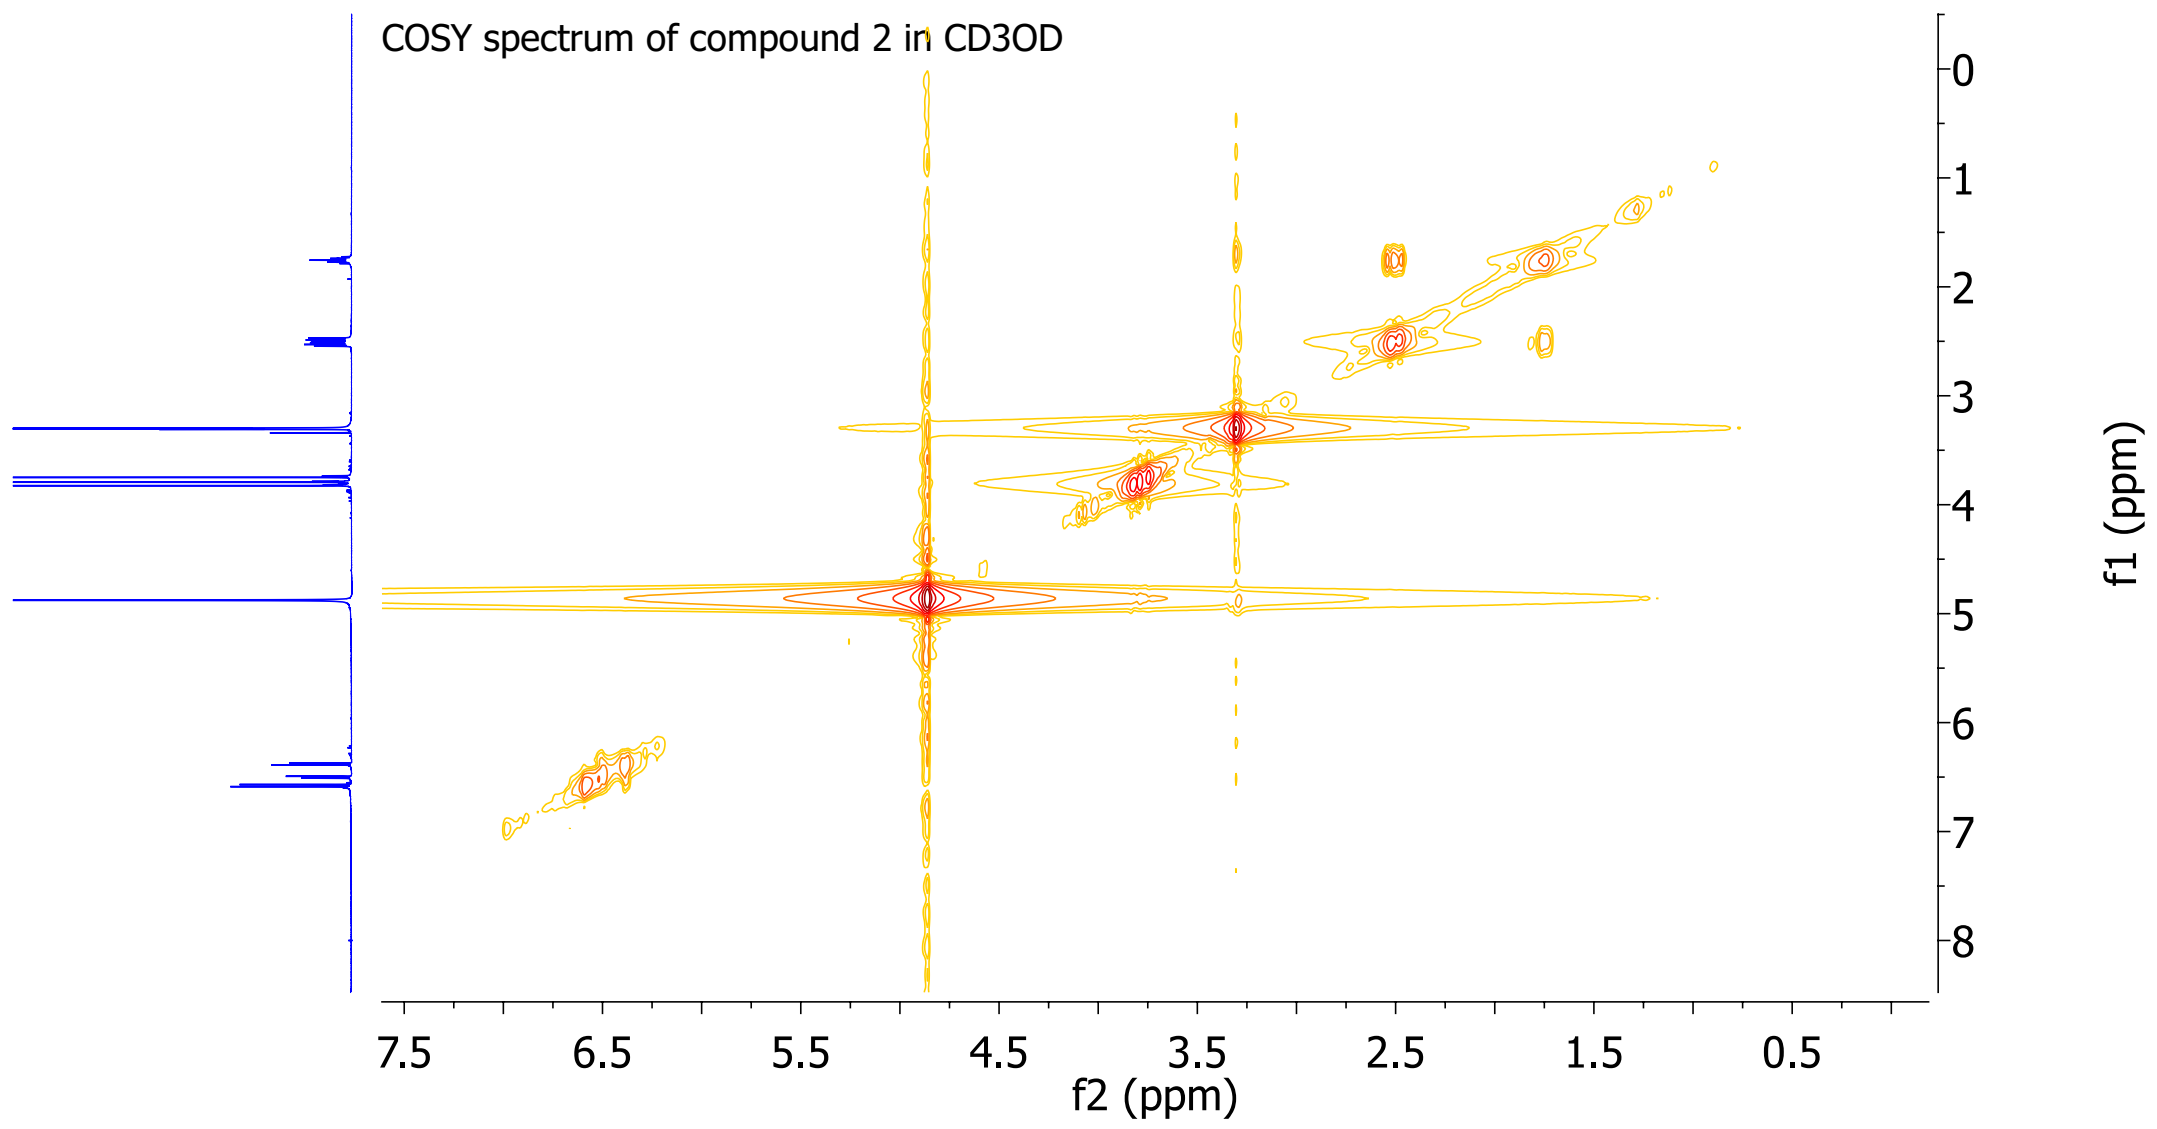

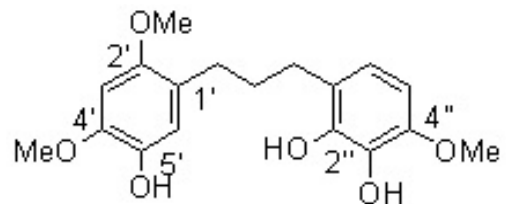

2

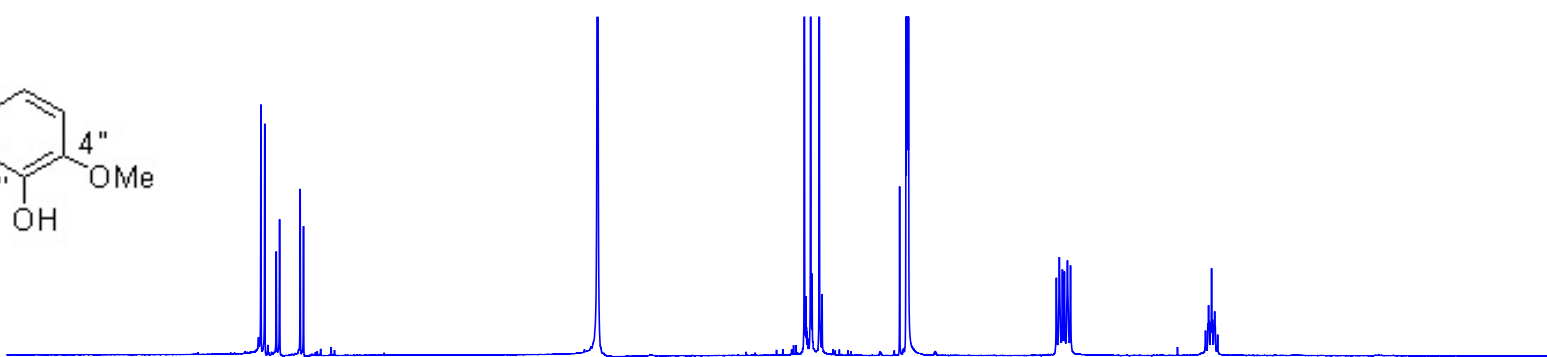HMQC spectrum of compound 2 in  $\text{CD}_3\text{OD}$ 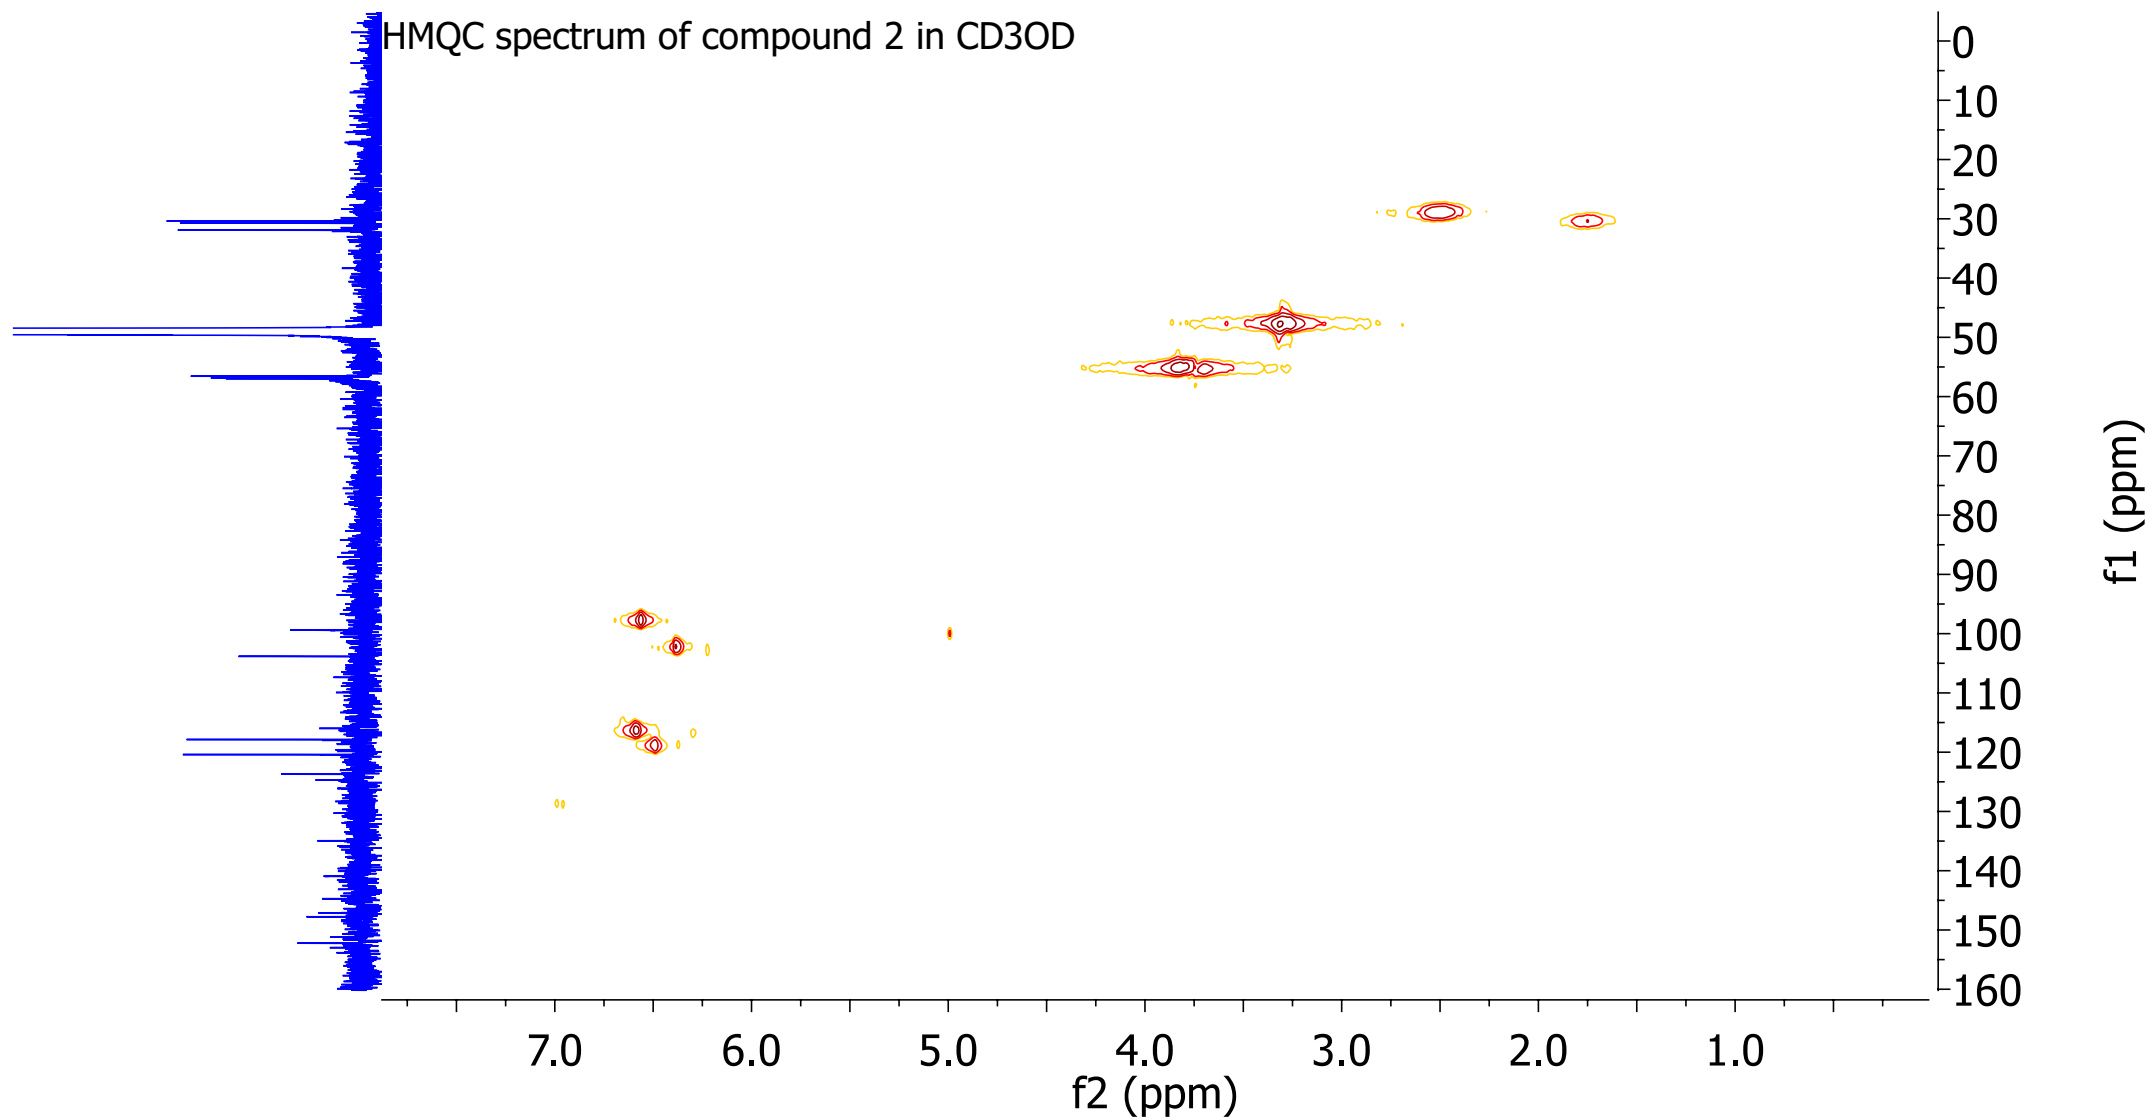

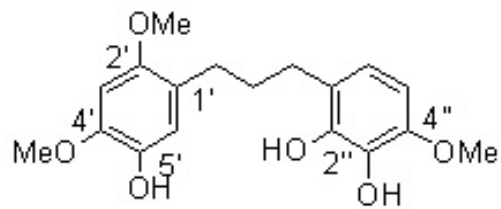

2

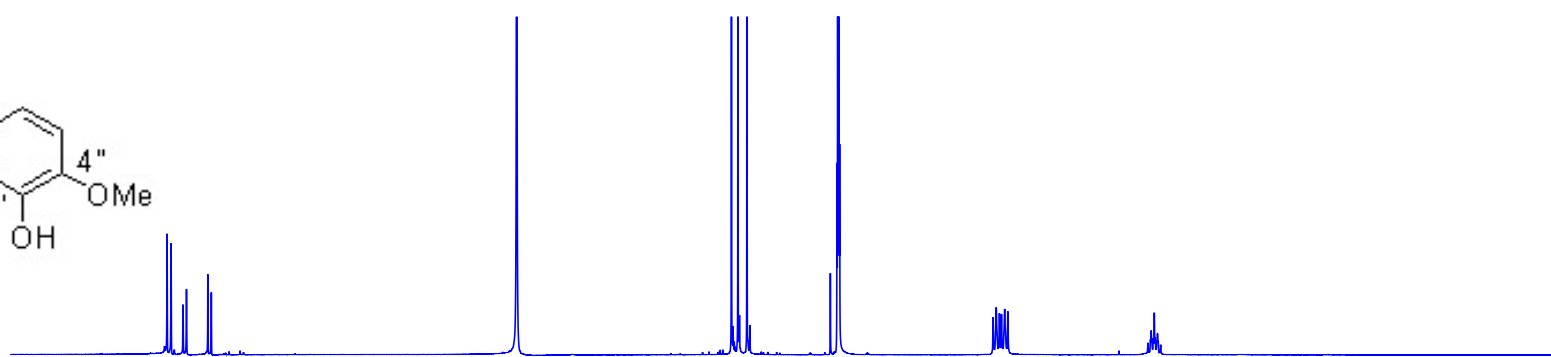HMBC spectrum of compound 2 in  $\text{CD}_3\text{OD}$ 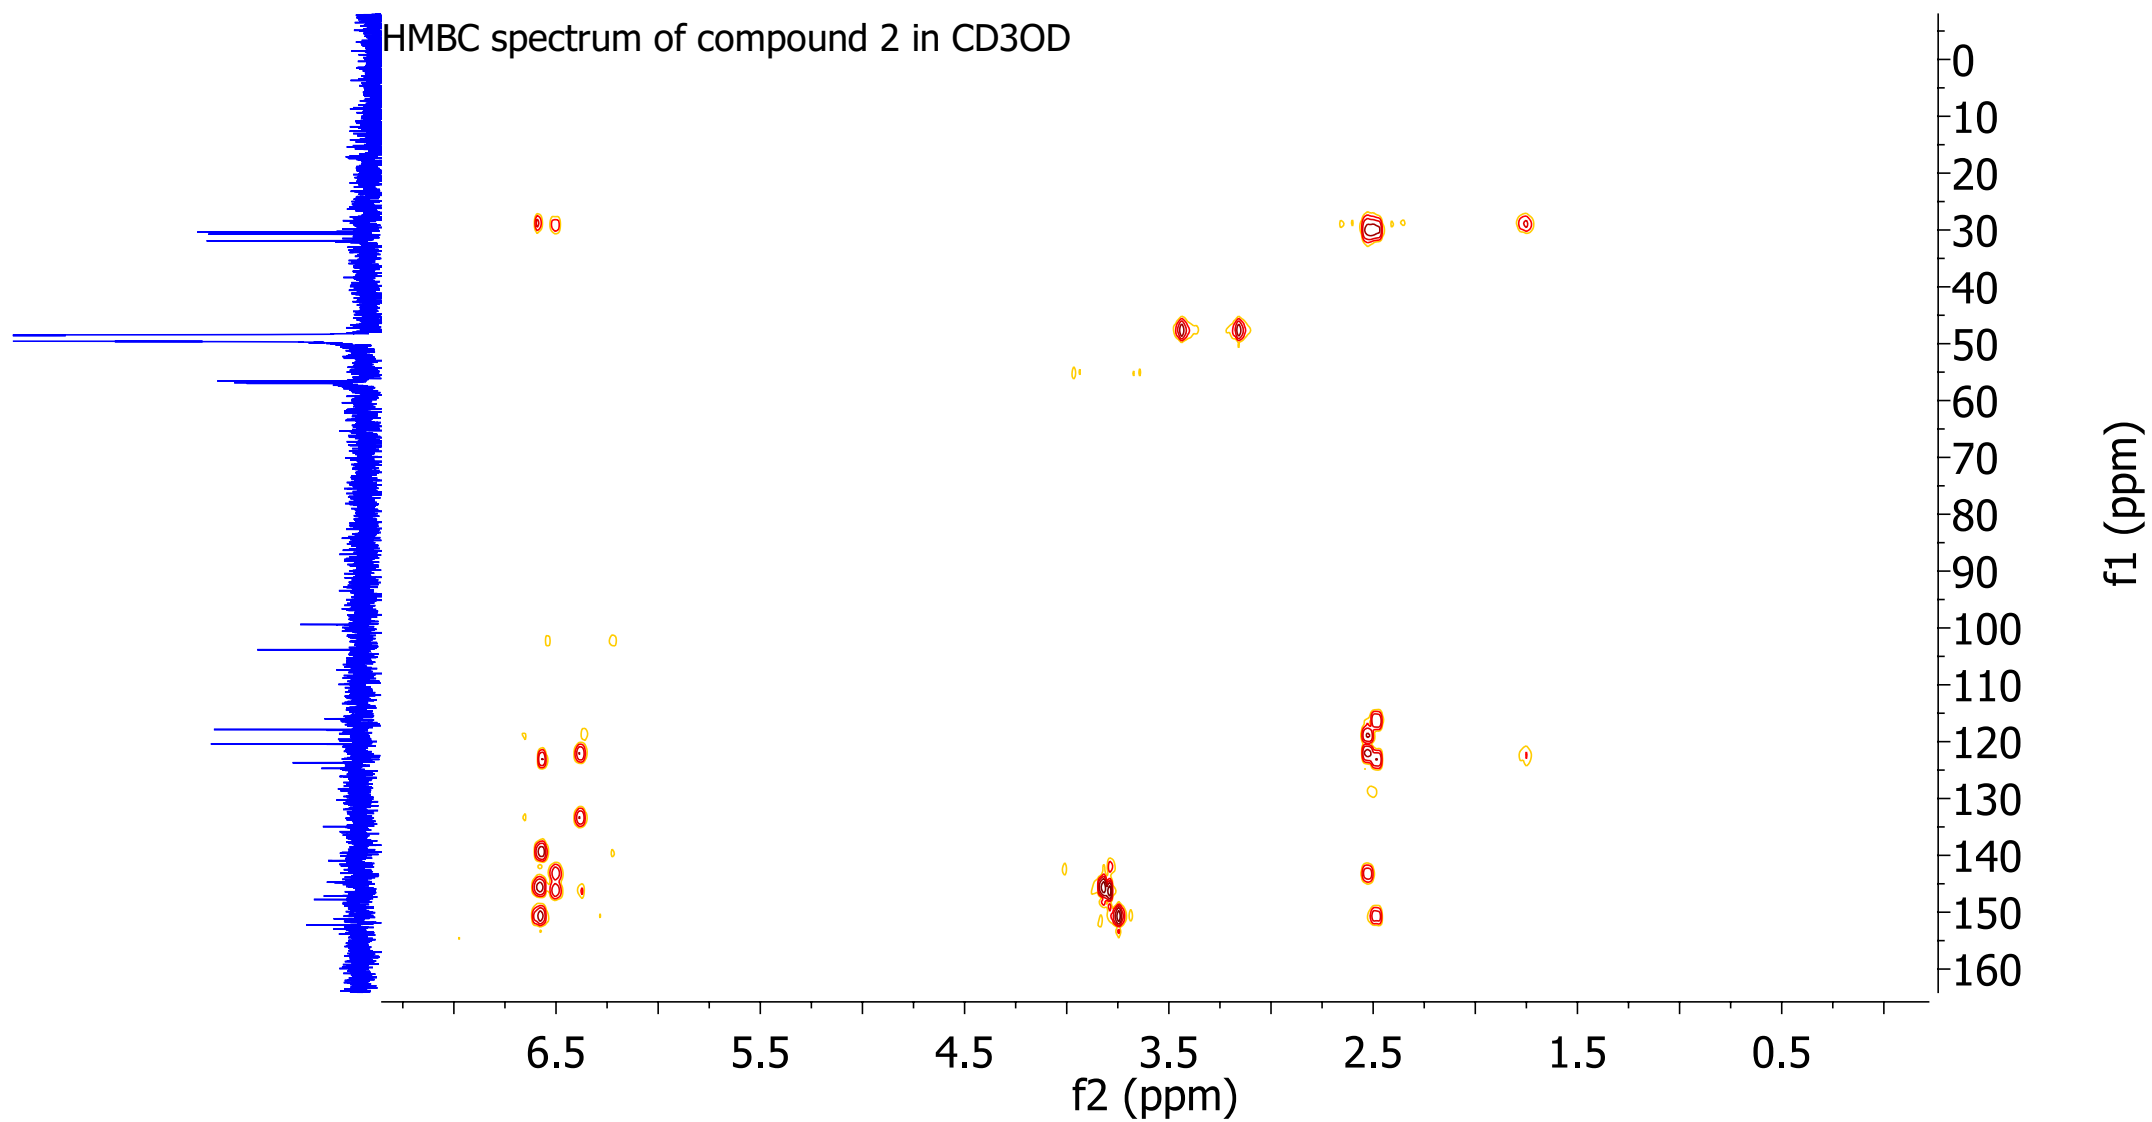

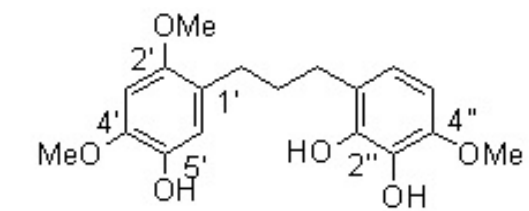

2

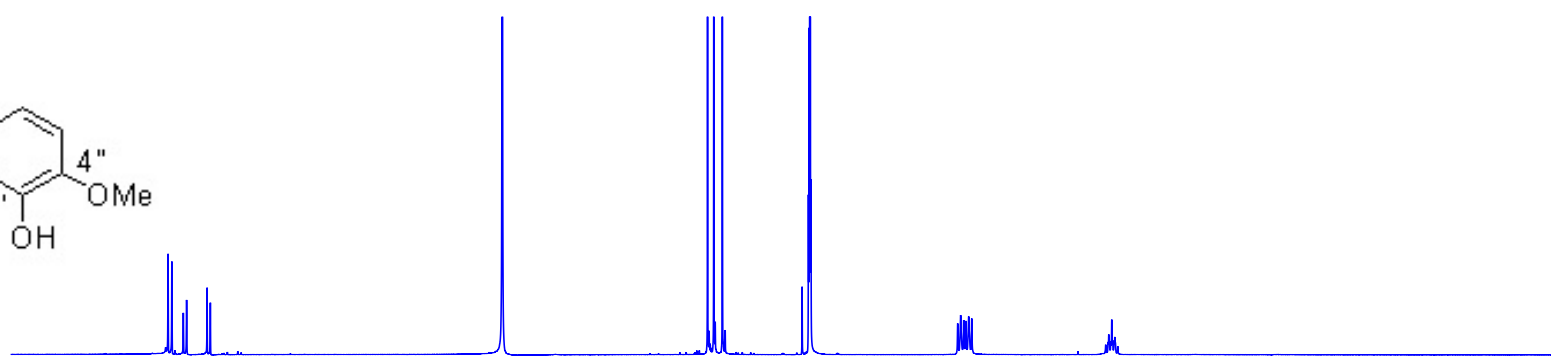NOESY spectrum of compound 2 in  $\text{CD}_3\text{OD}$ 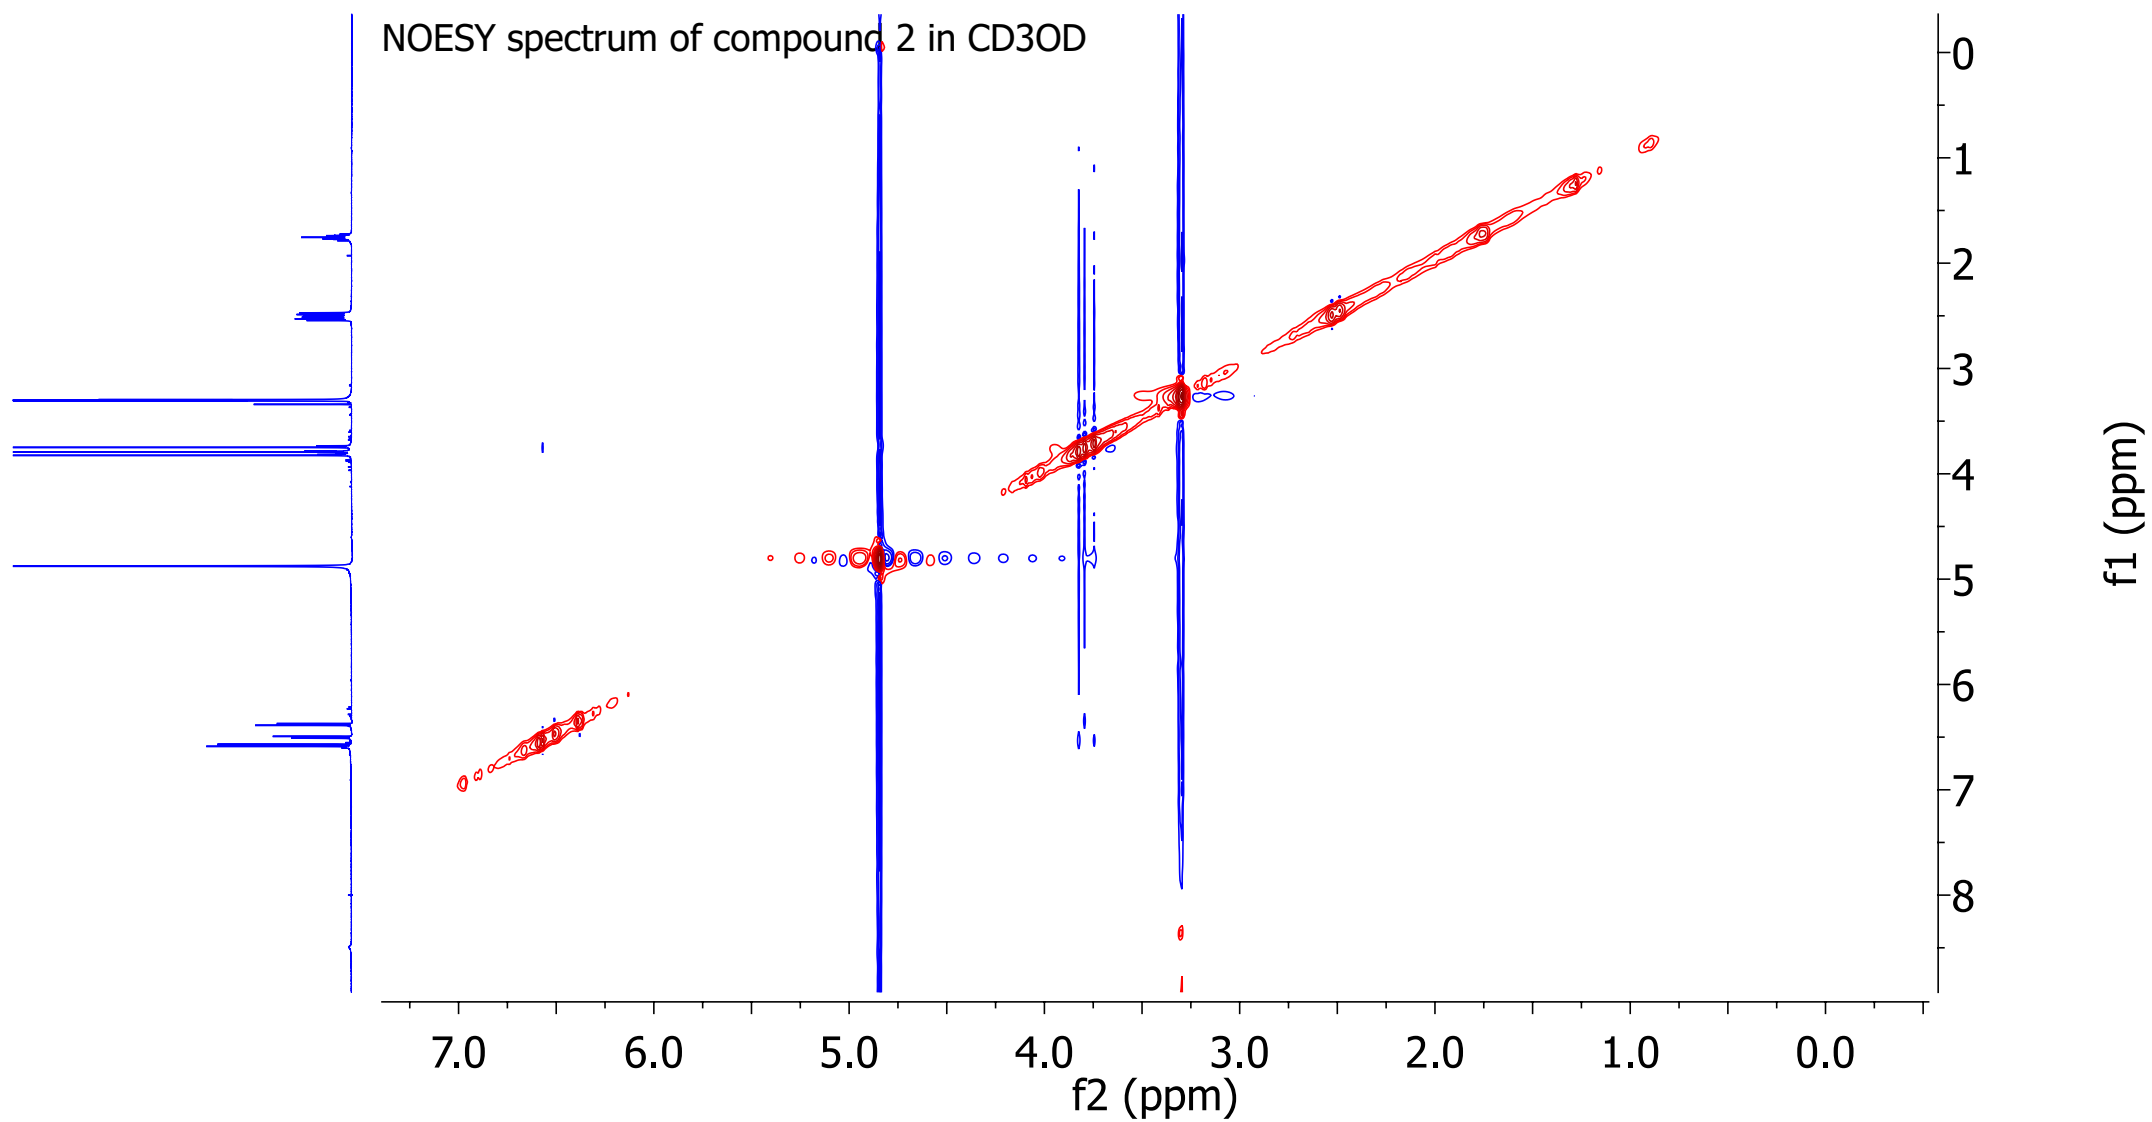

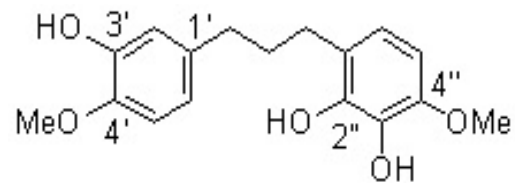

3

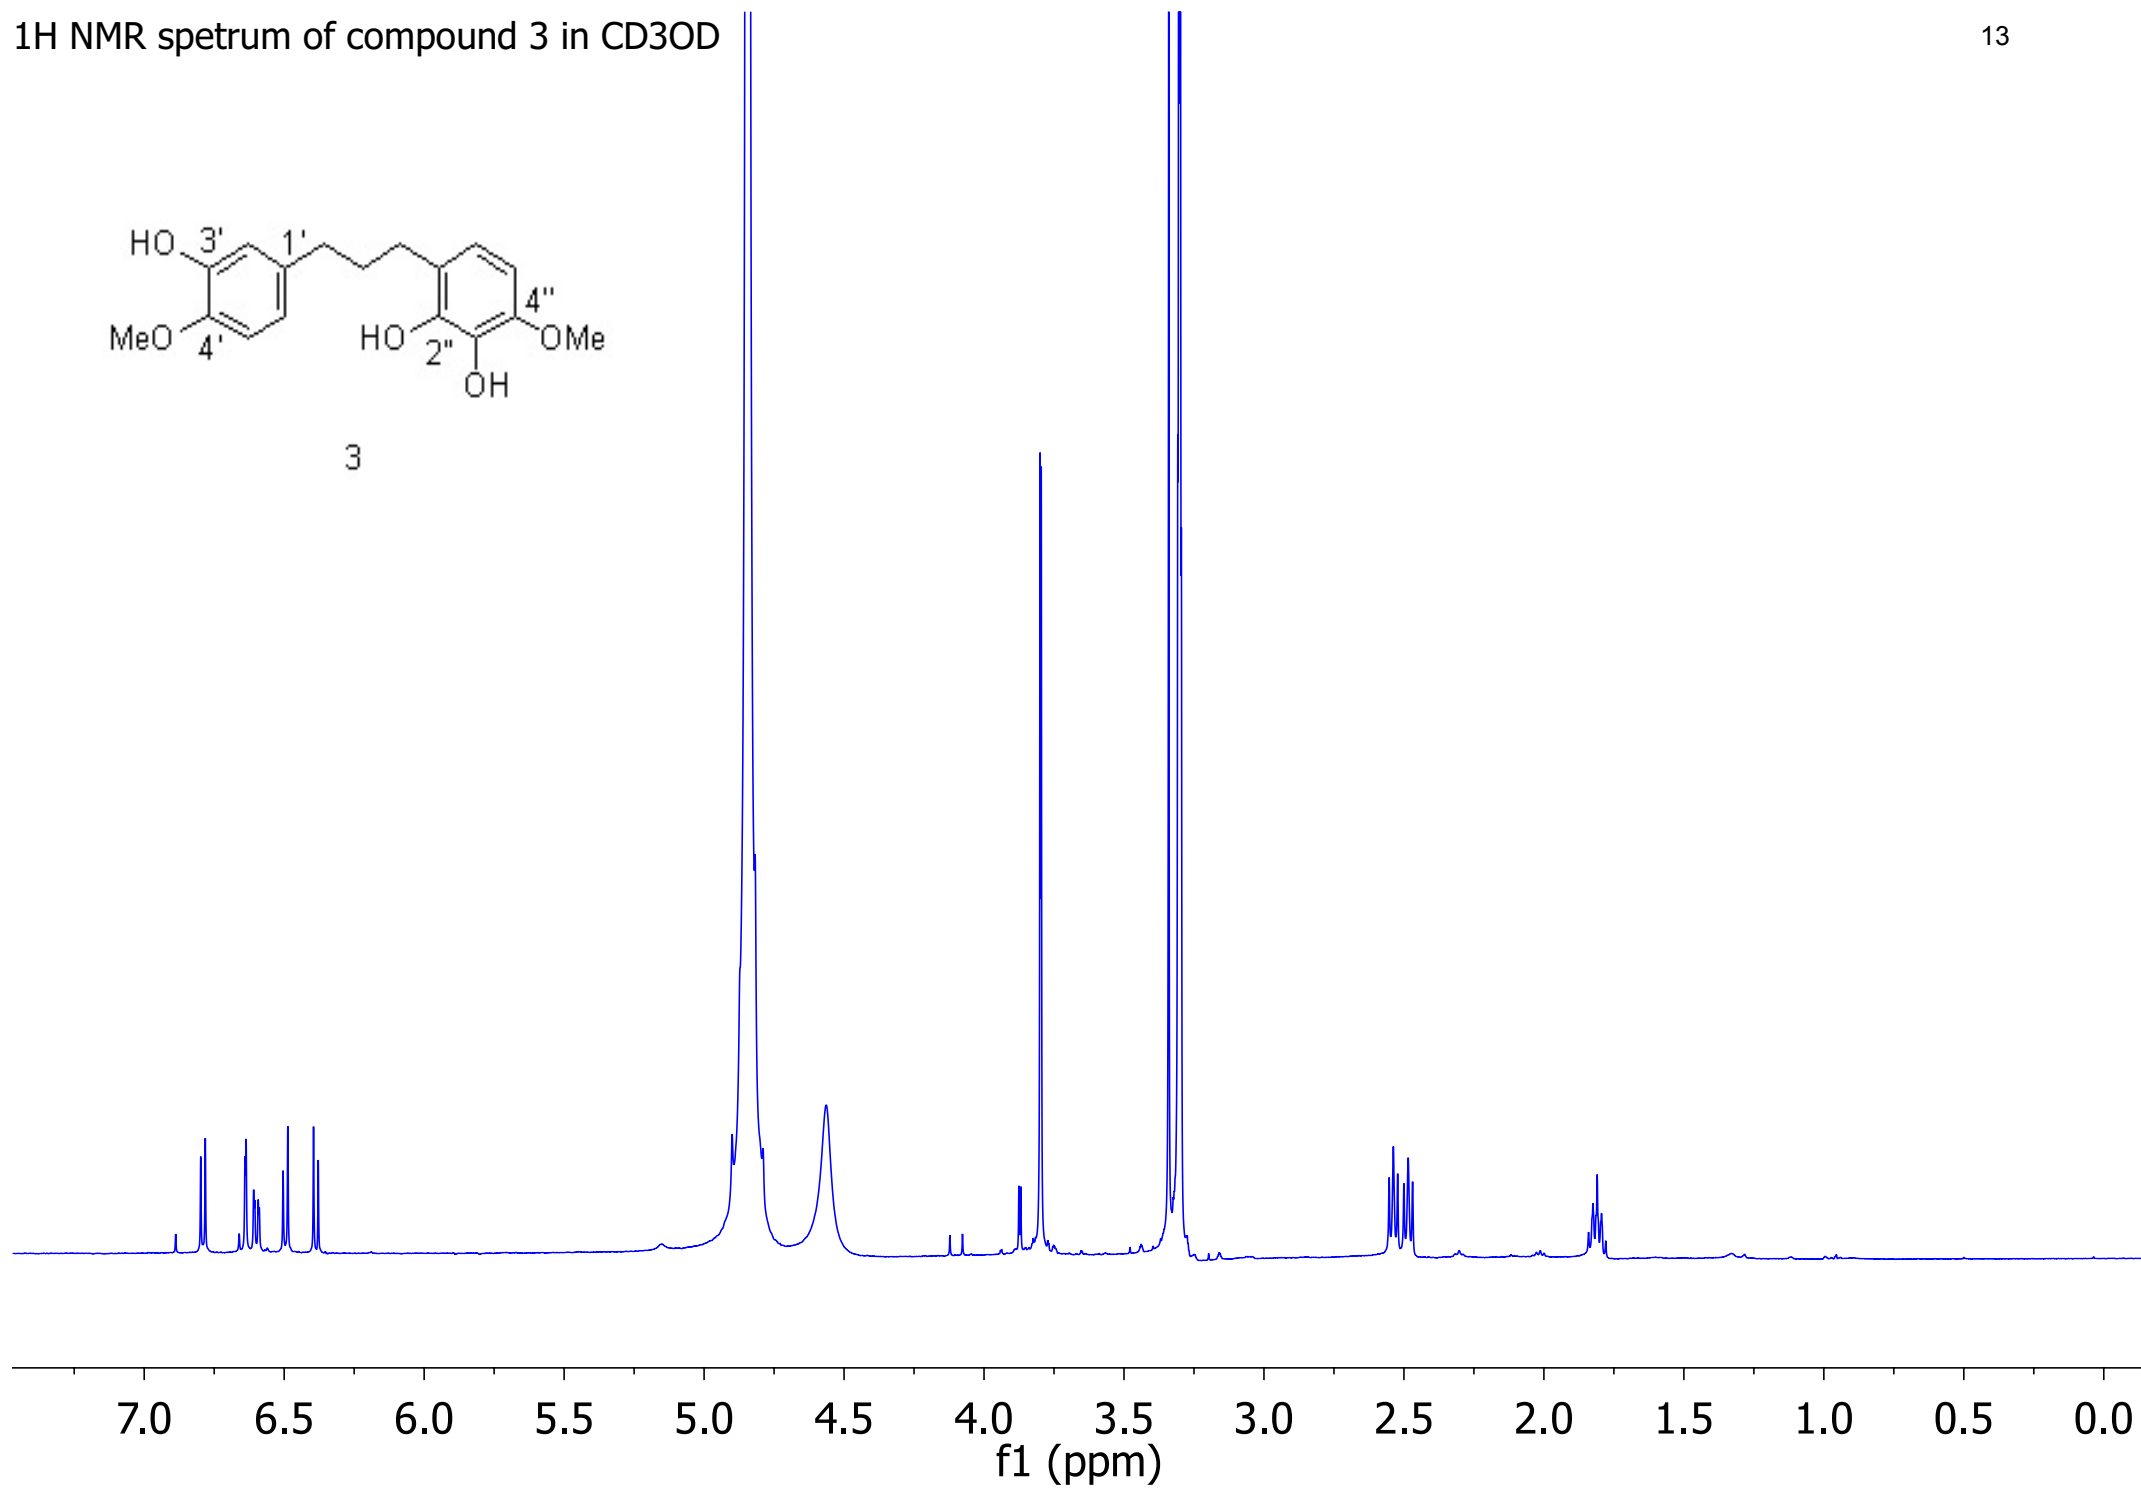

<sup>13</sup>C NMR spectrum of 3 in CD<sub>3</sub>OD

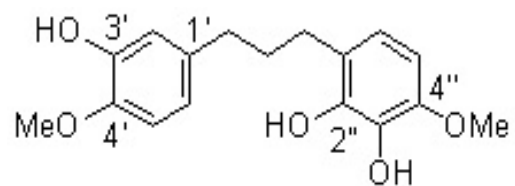

3

- 147.836
- 147.274
- 147.035
- 144.731
- 137.179
- 134.975
- 123.525
- 120.572
- 120.508
- 116.535
- 112.928
- 100.770
- 56.588
- 56.561
- 49.849
- 36.063
- 33.224
- 30.555

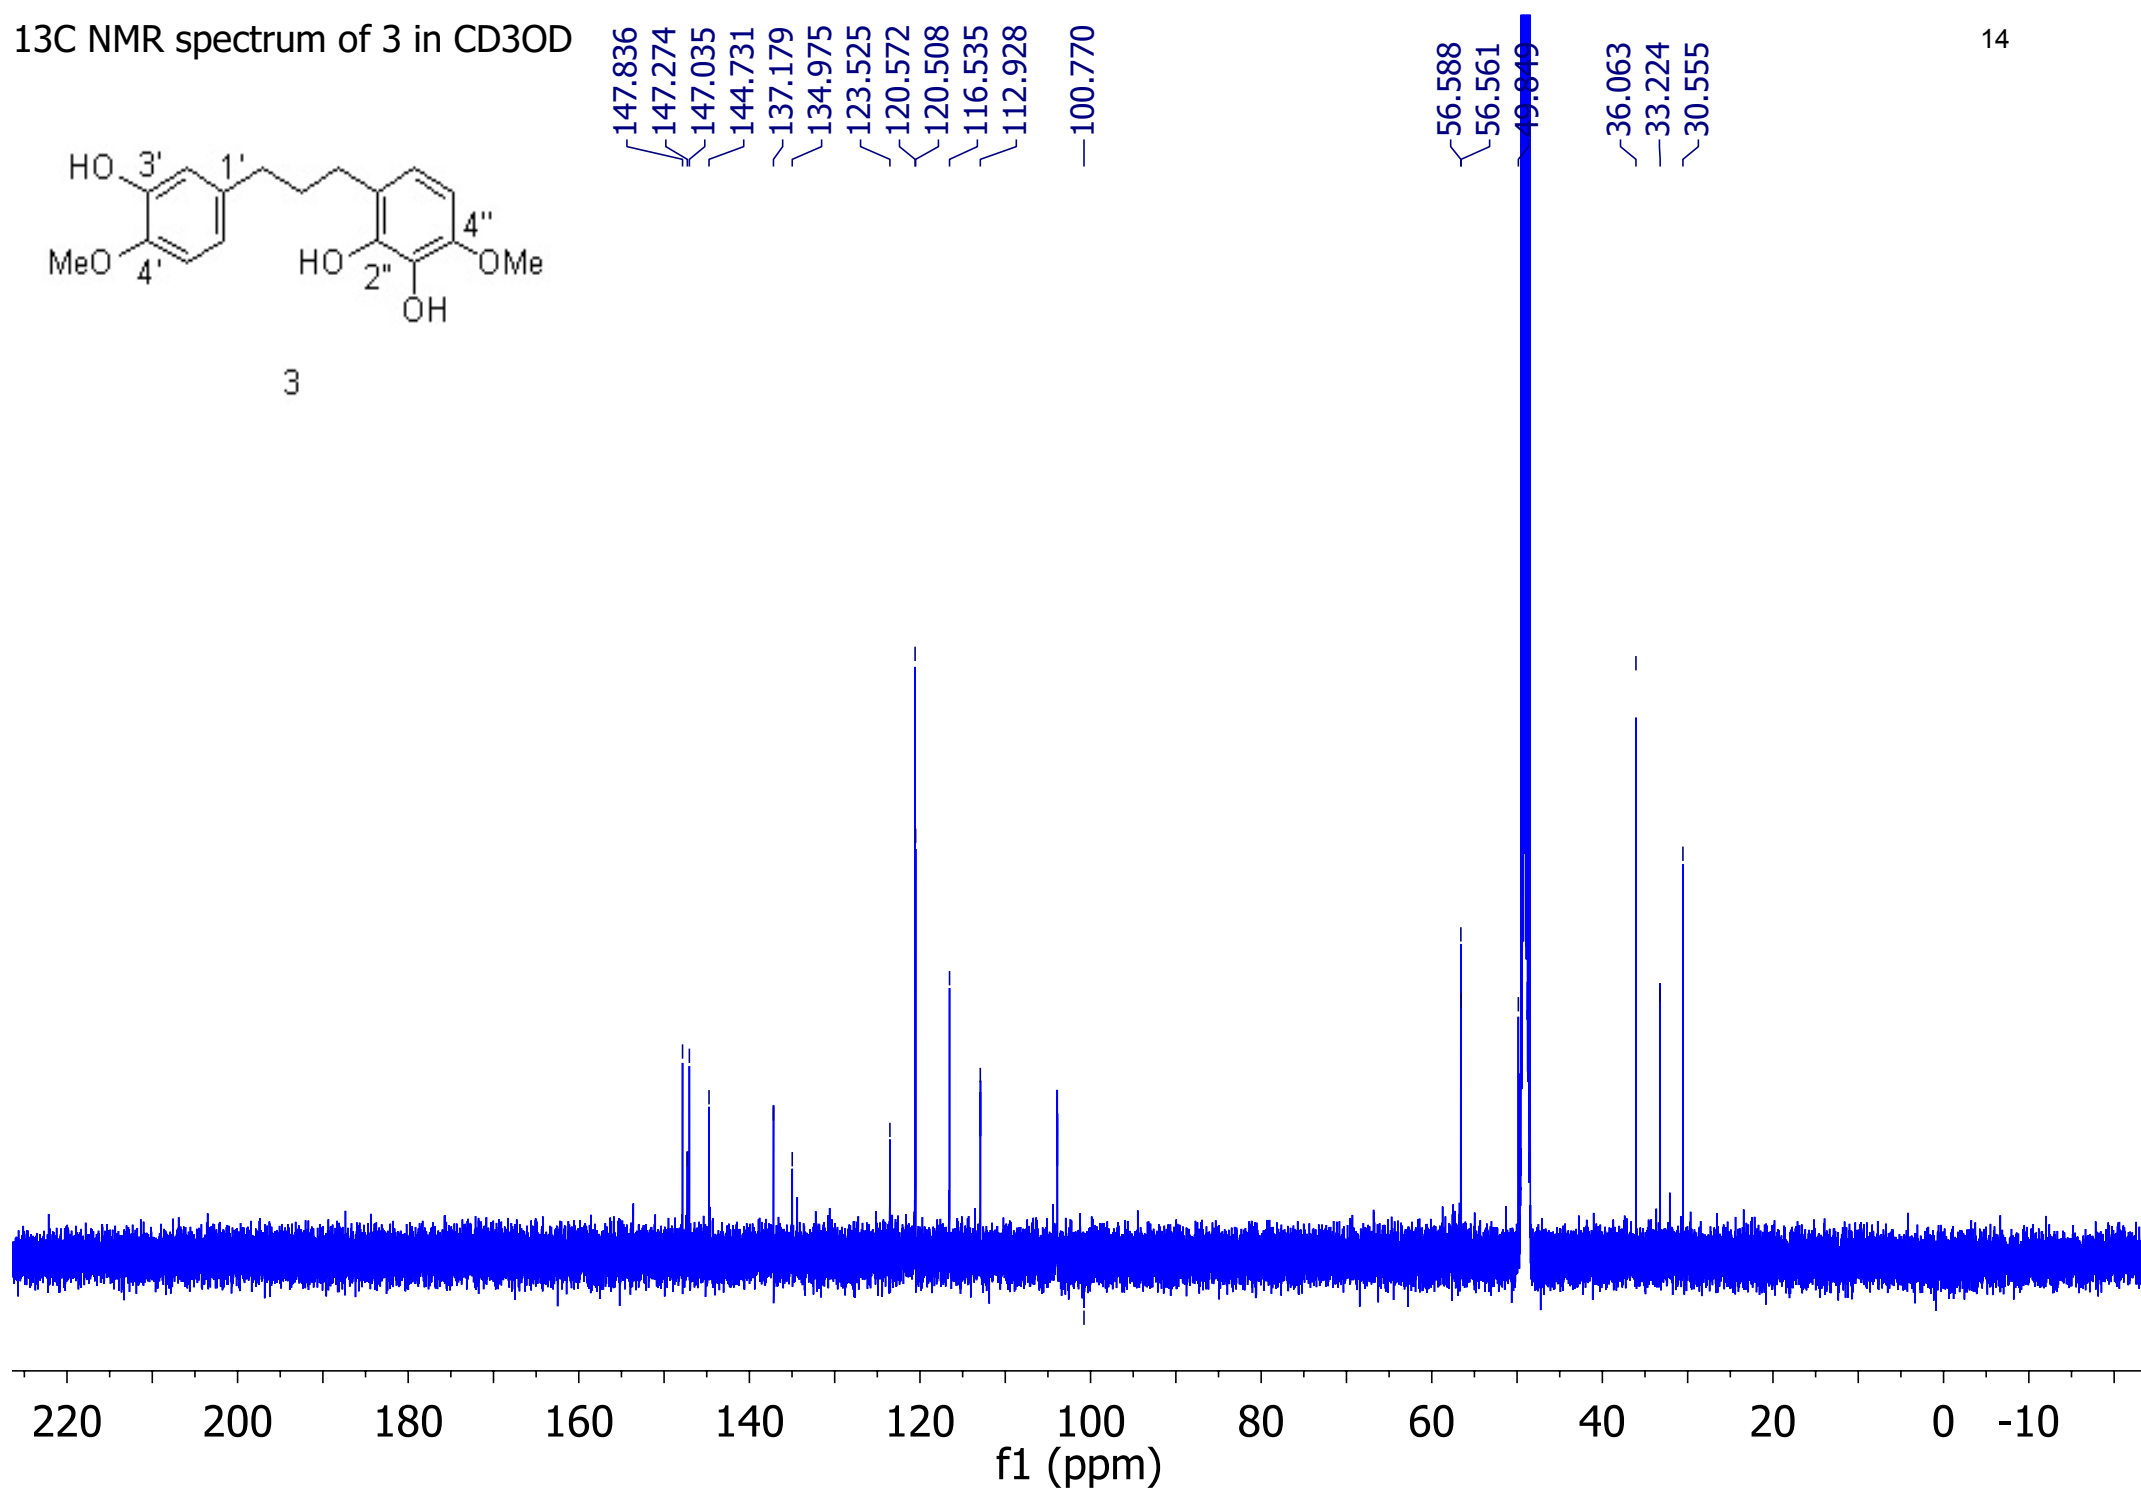

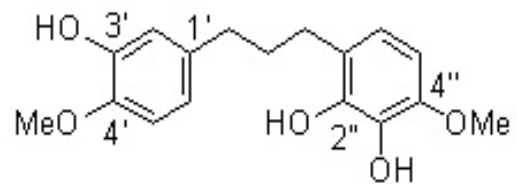

3

COSY spectrum of compound 3 in CD<sub>3</sub>OD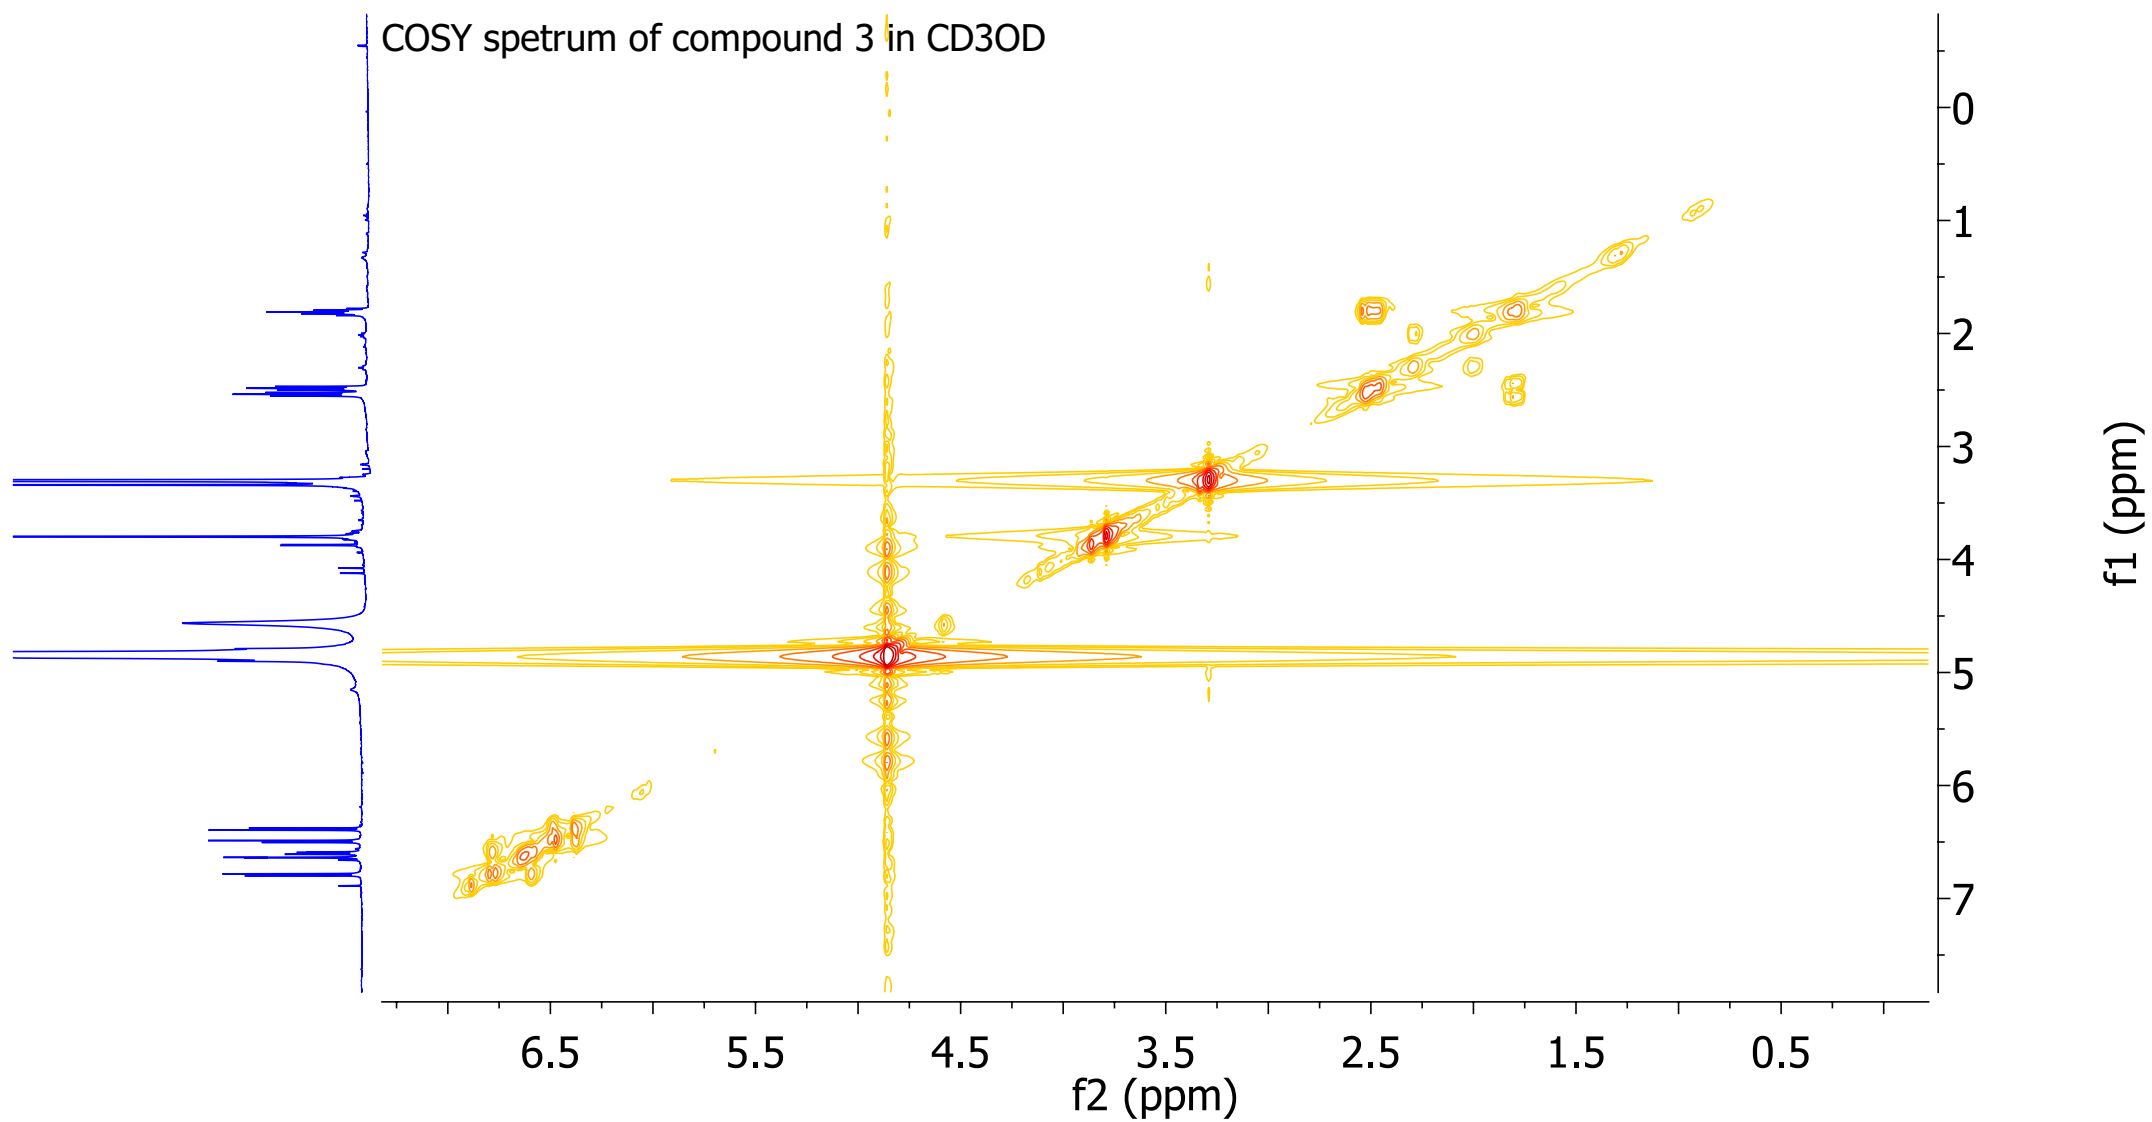

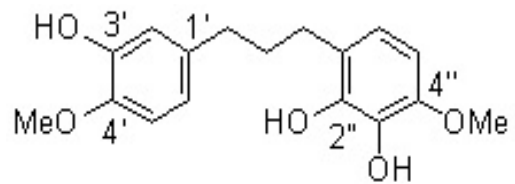

3

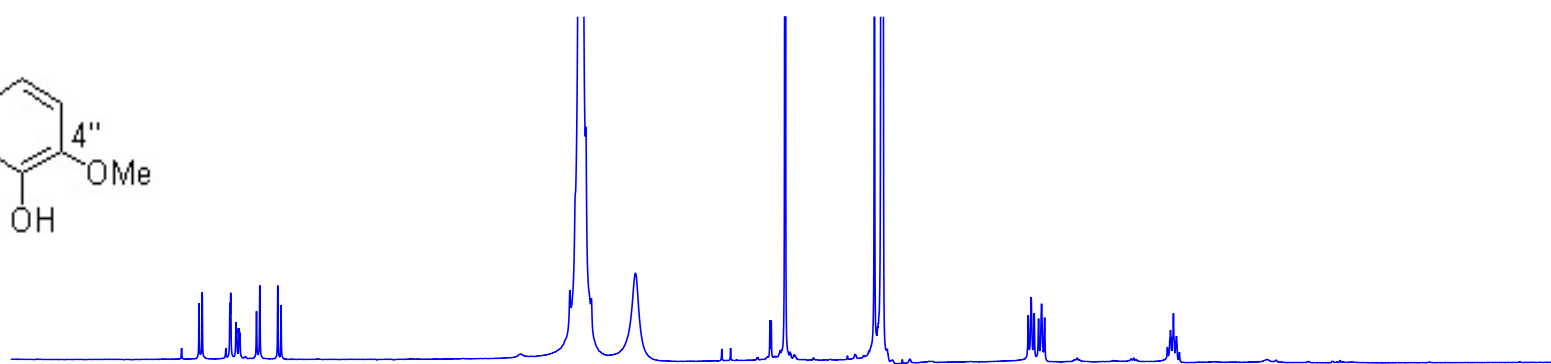HMQC spectrum of compound 3 in CD<sub>3</sub>OD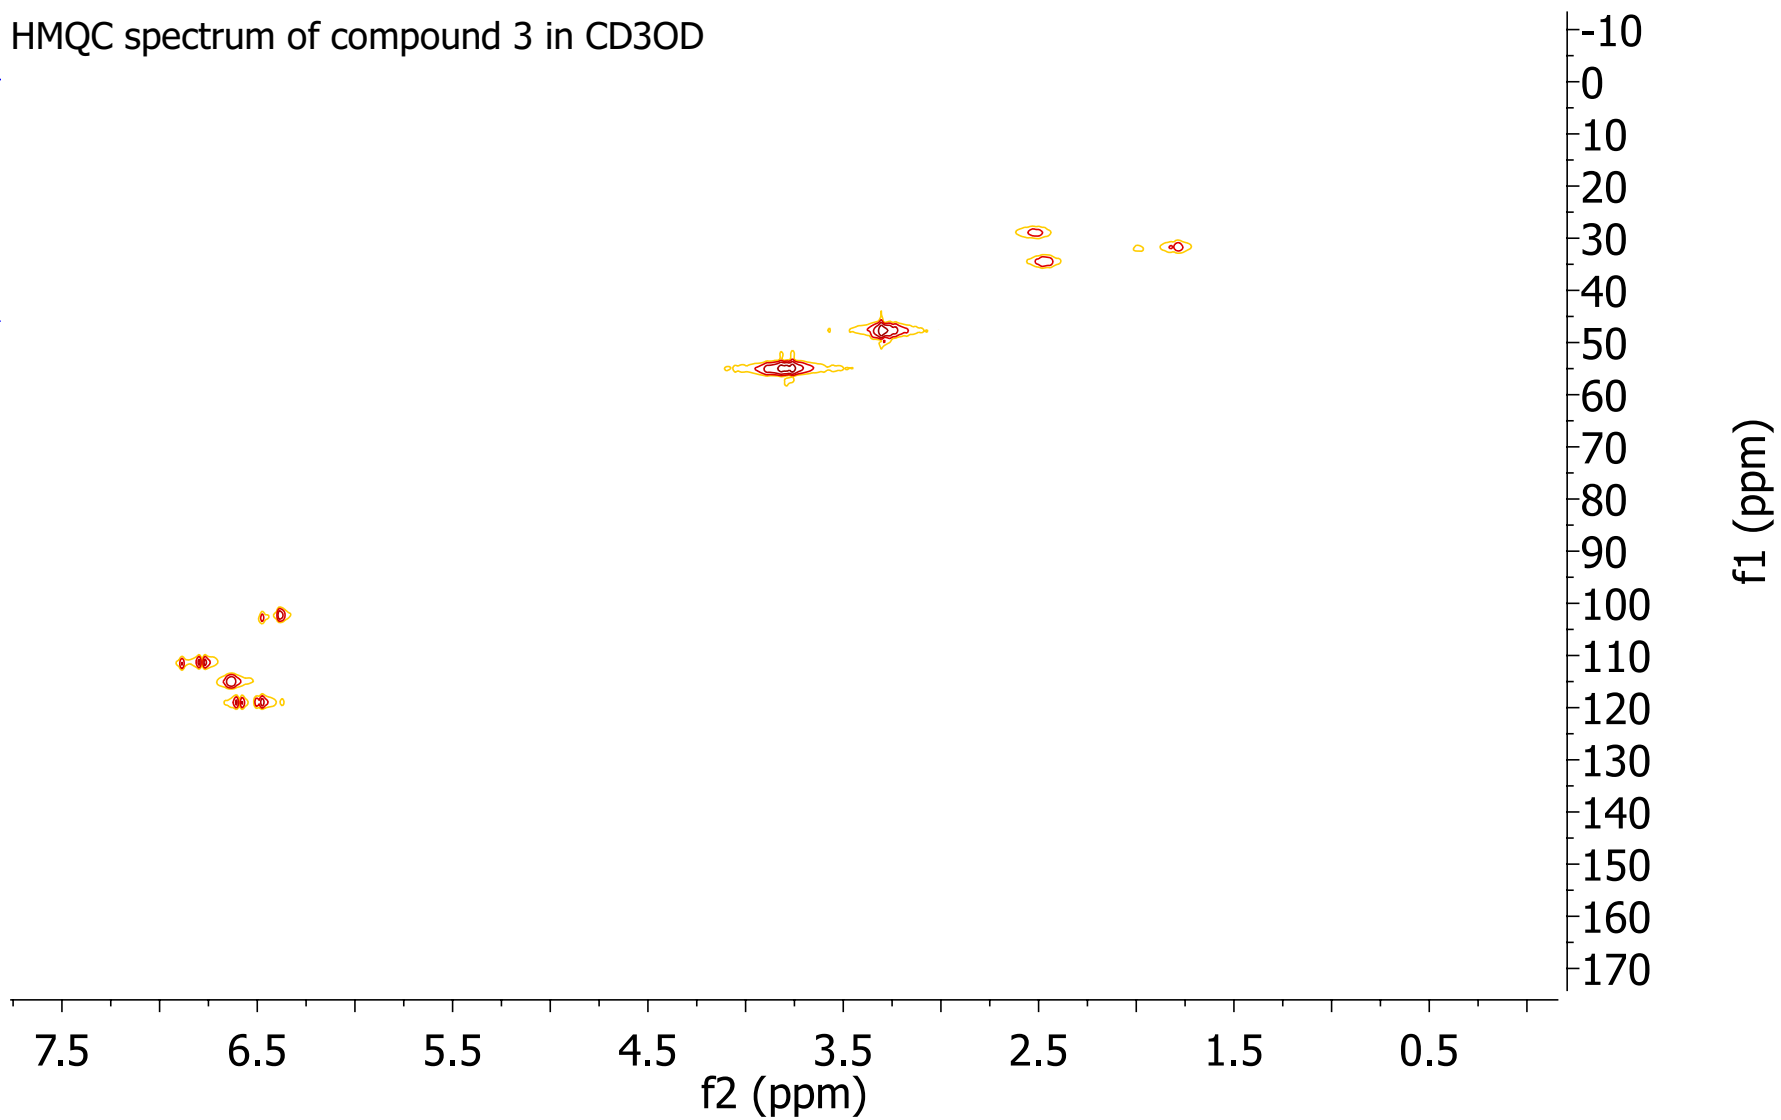



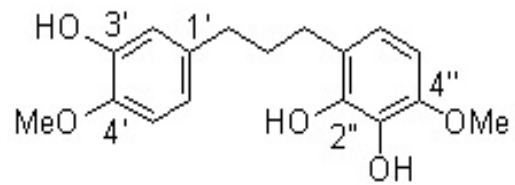

3

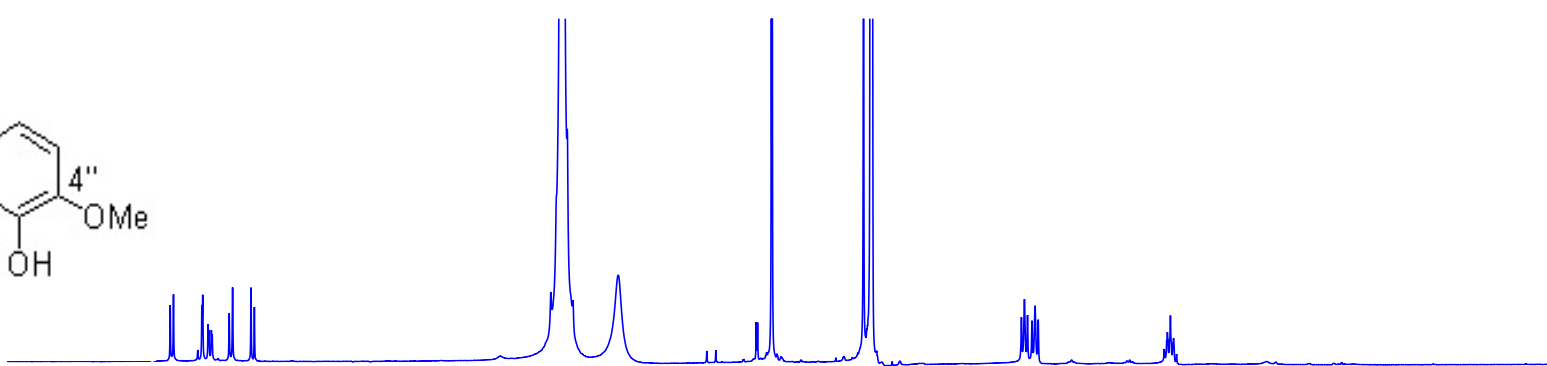HMBC spectrum of compound 3 in CD<sub>3</sub>OD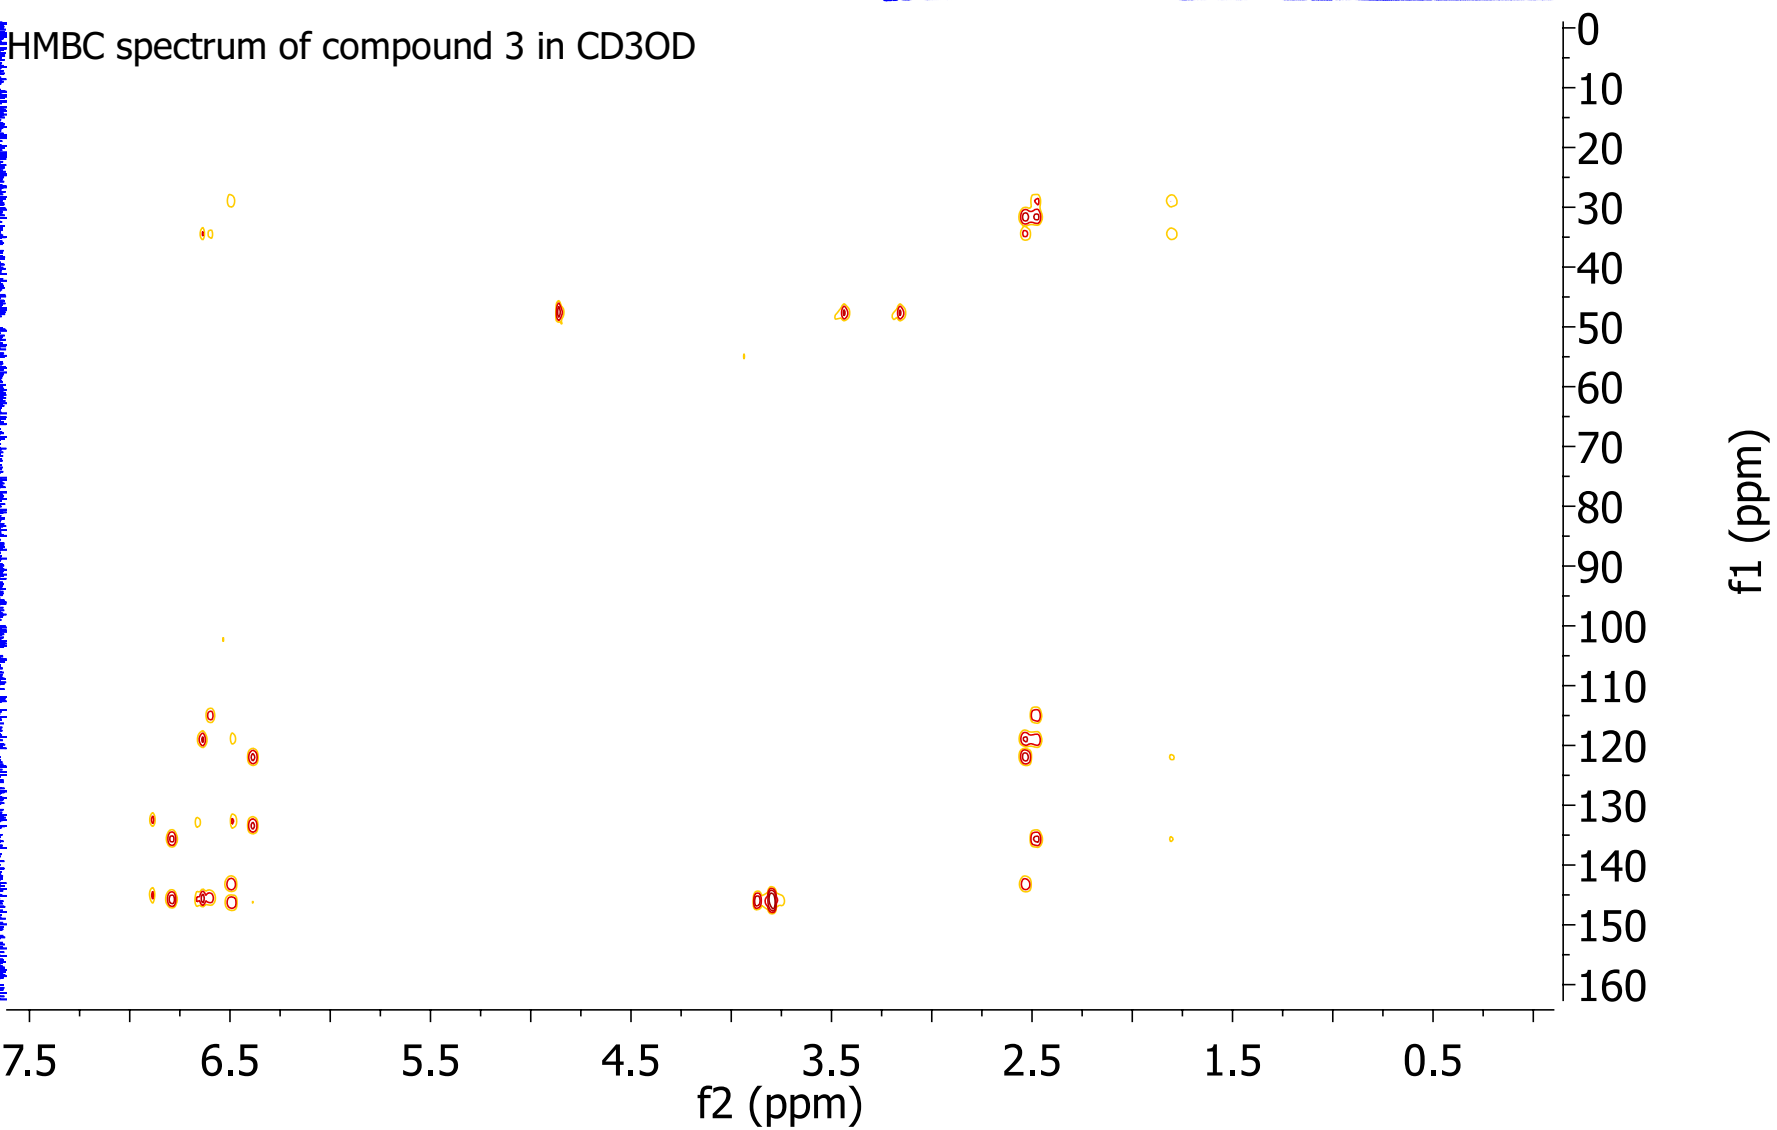

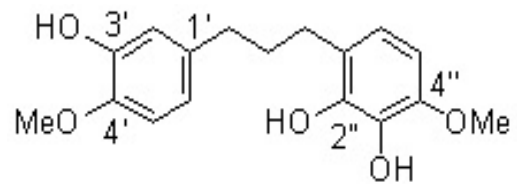

3

NOESY spectrum of compound 3 in CD<sub>3</sub>OD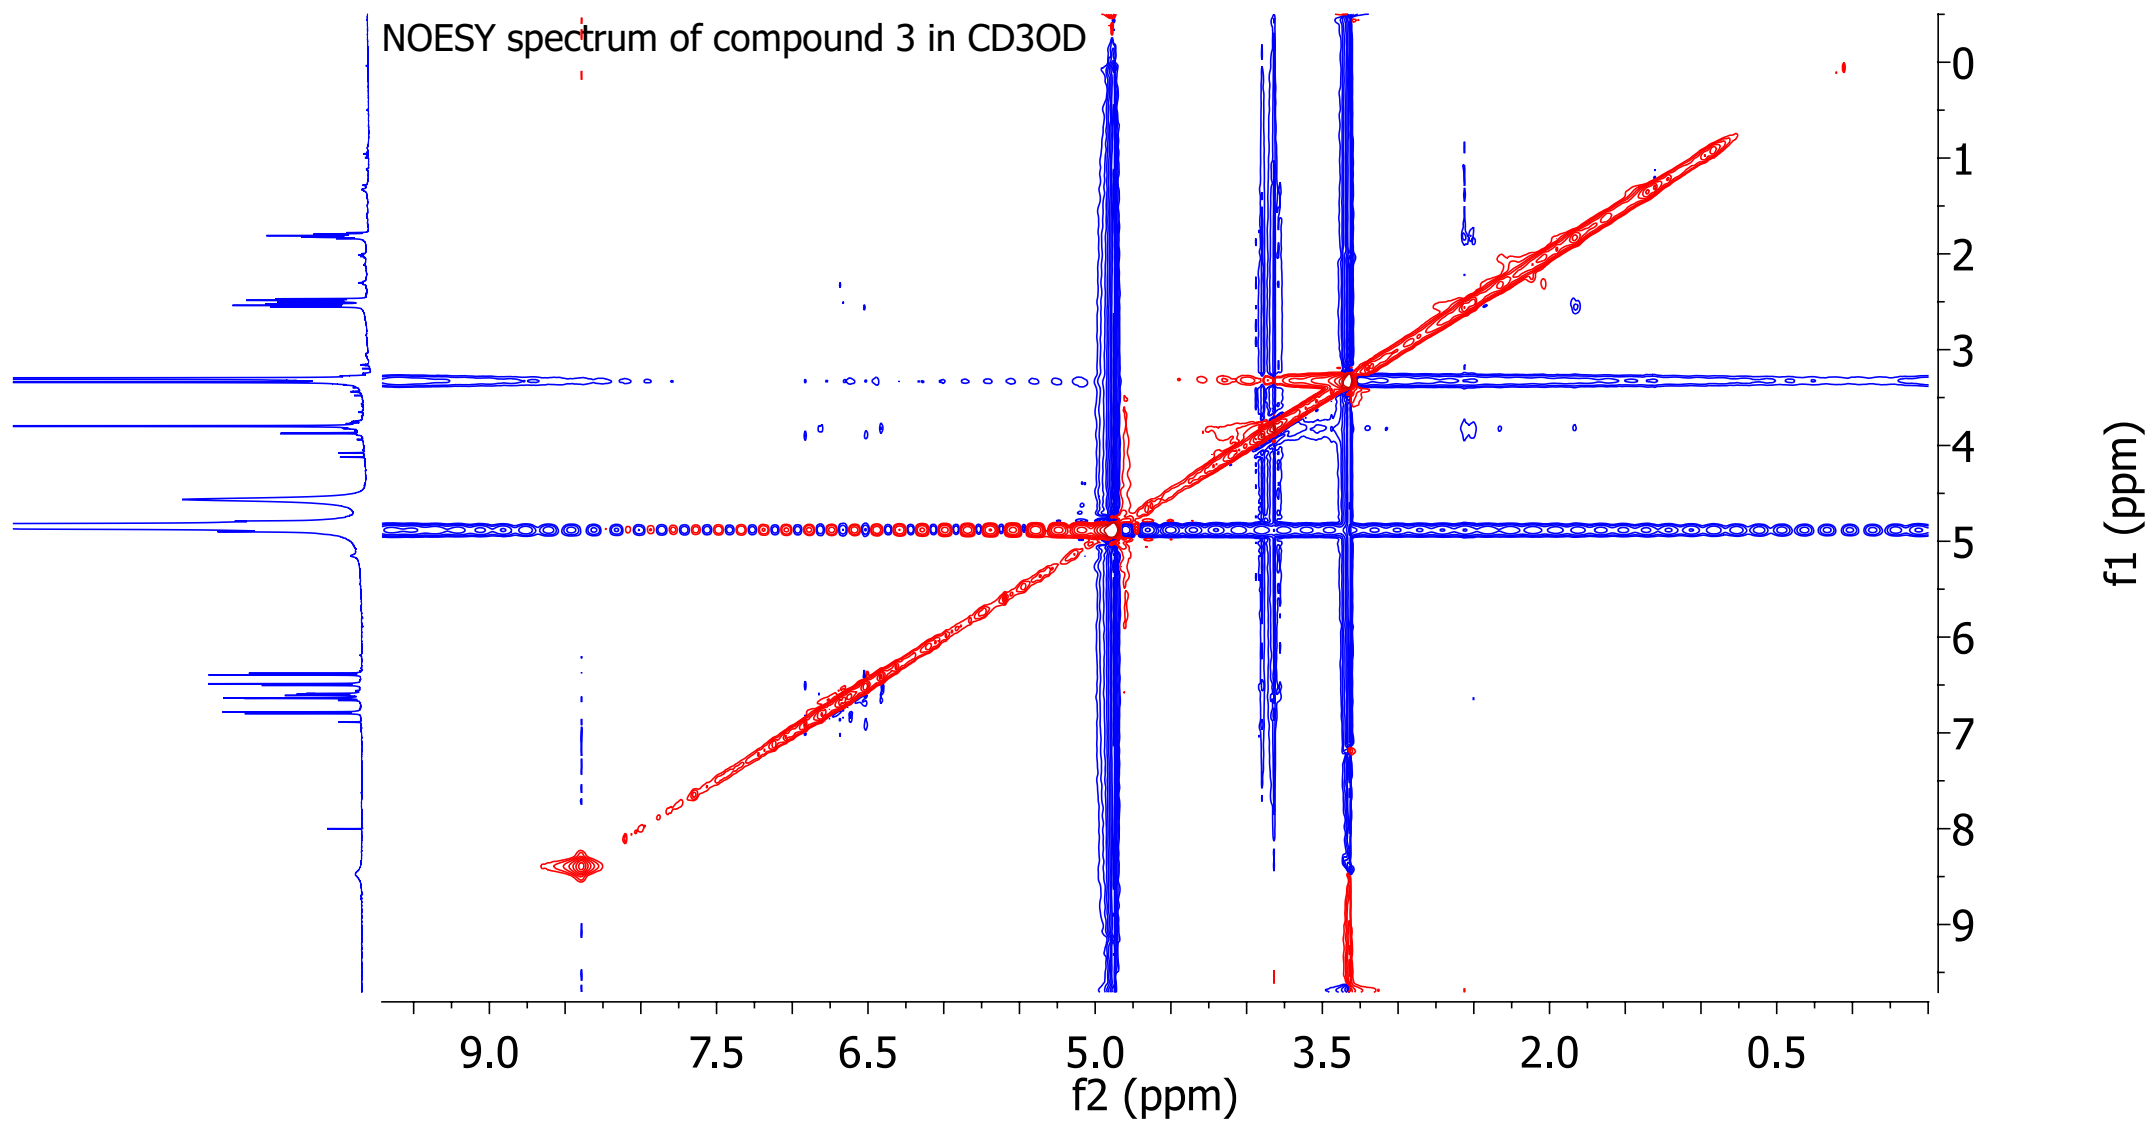

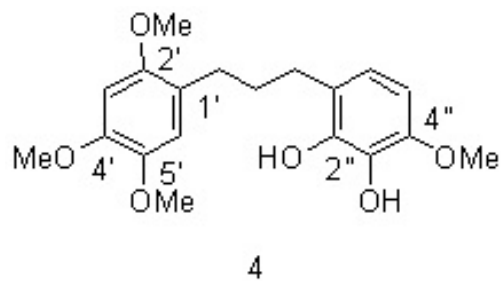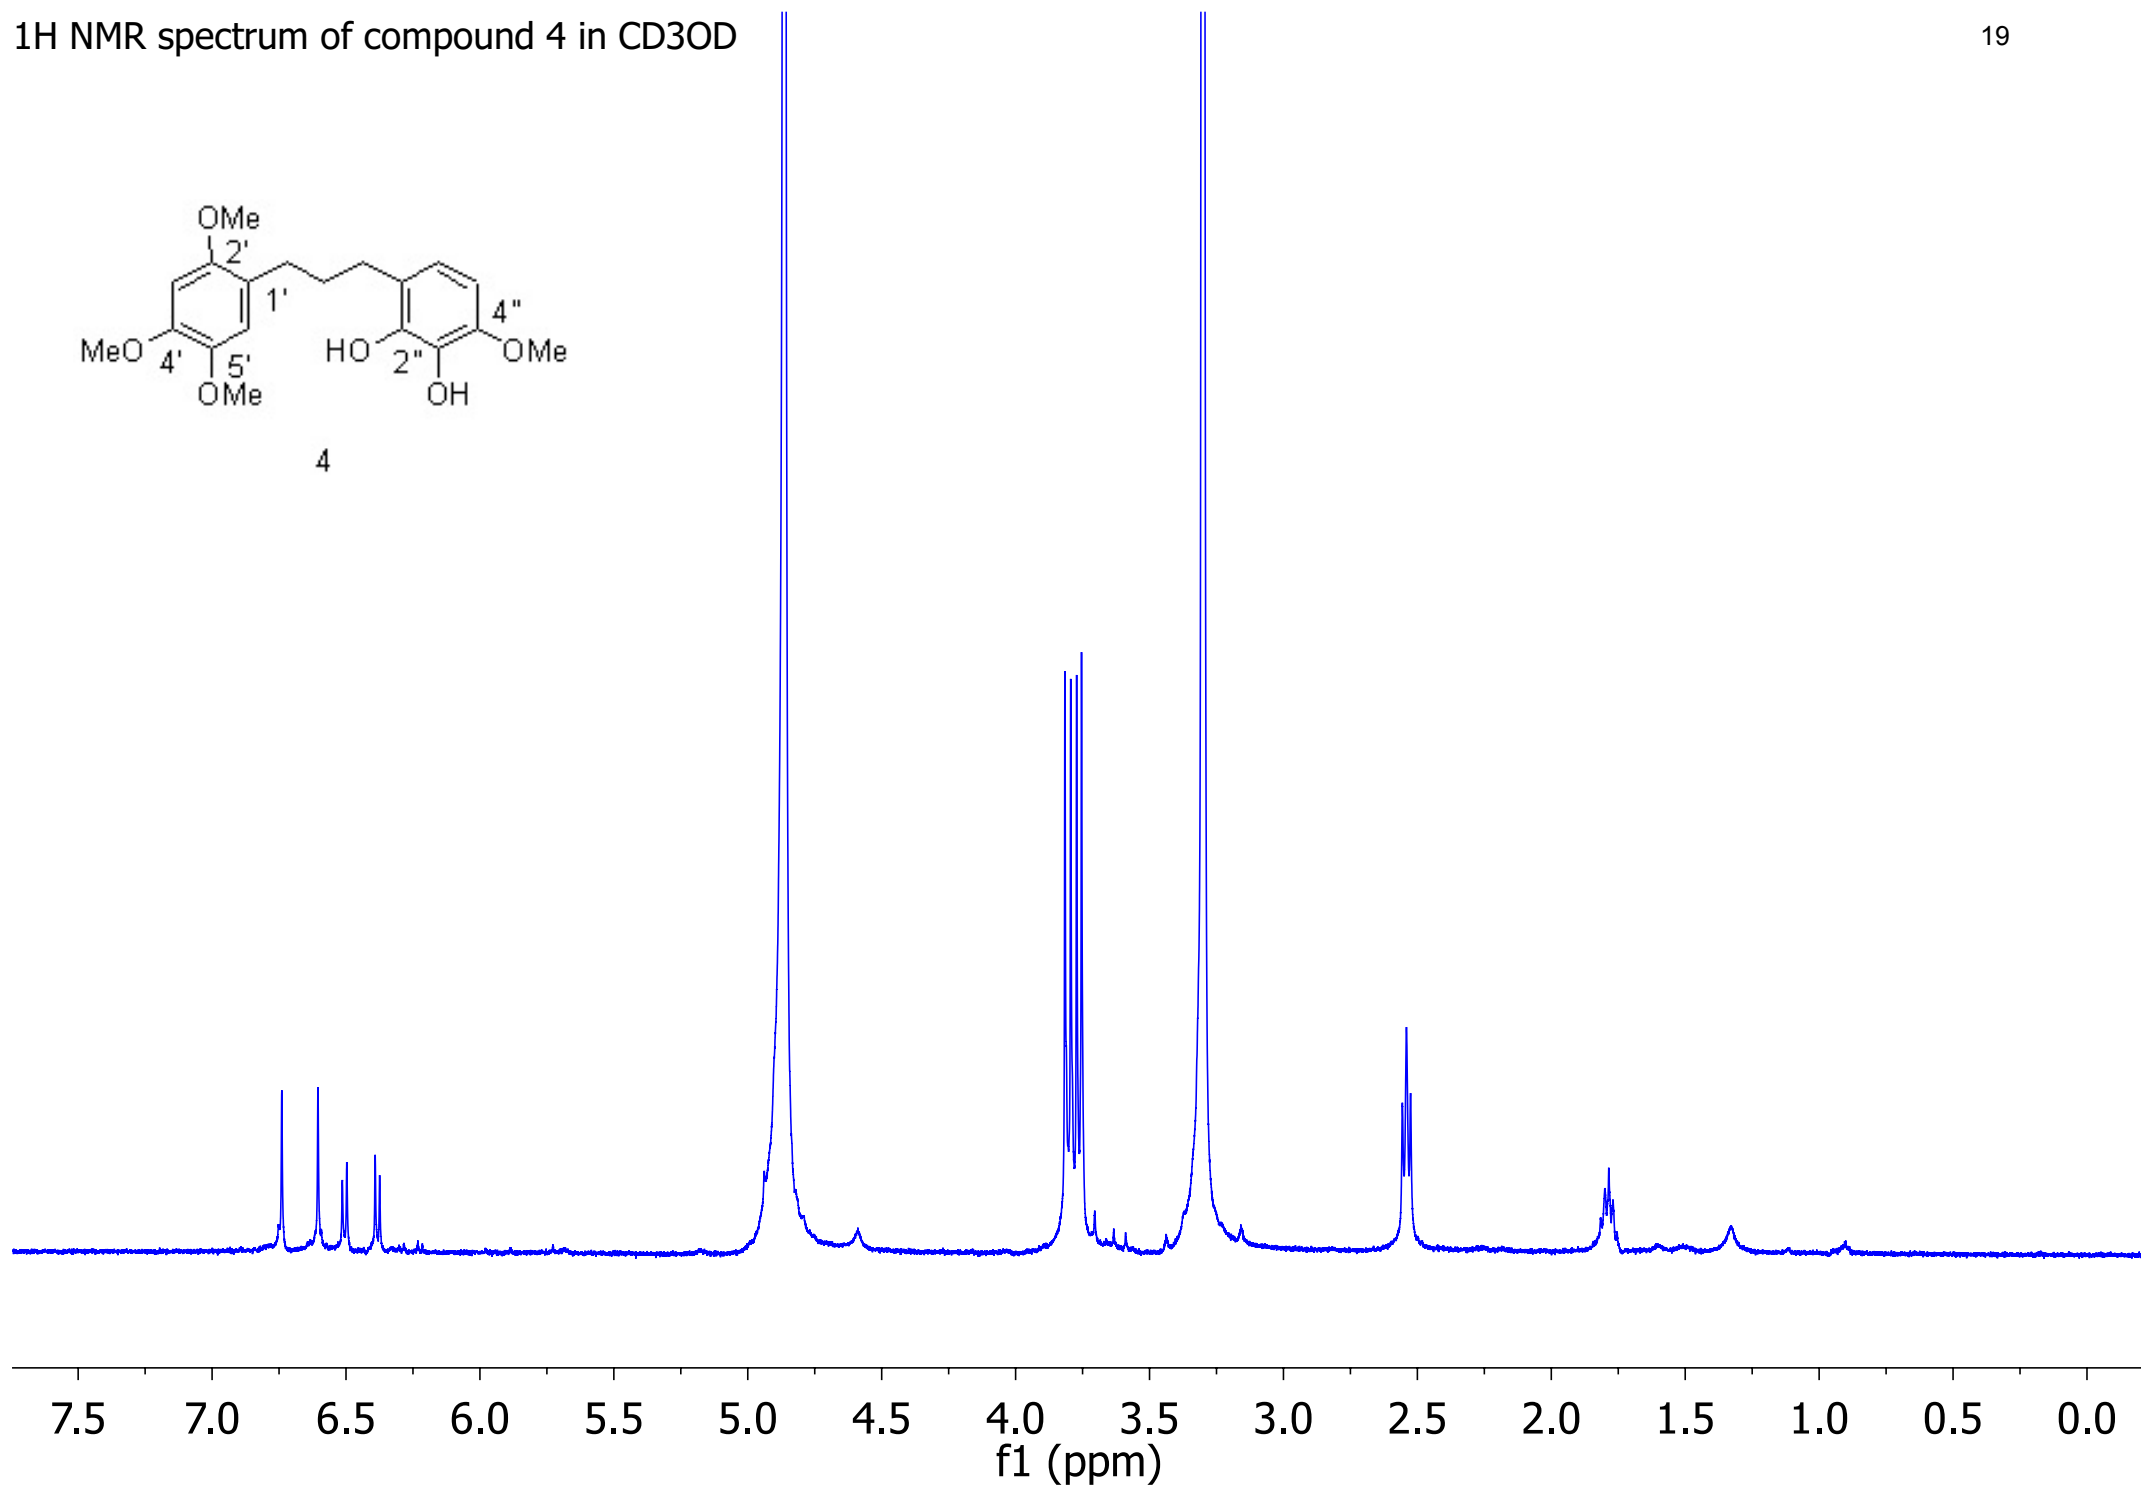

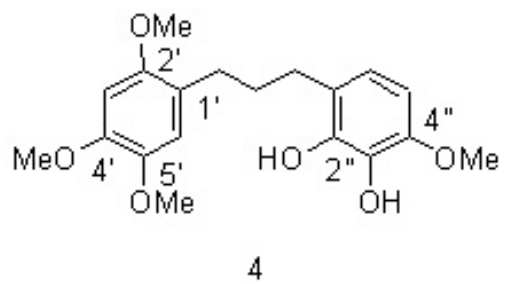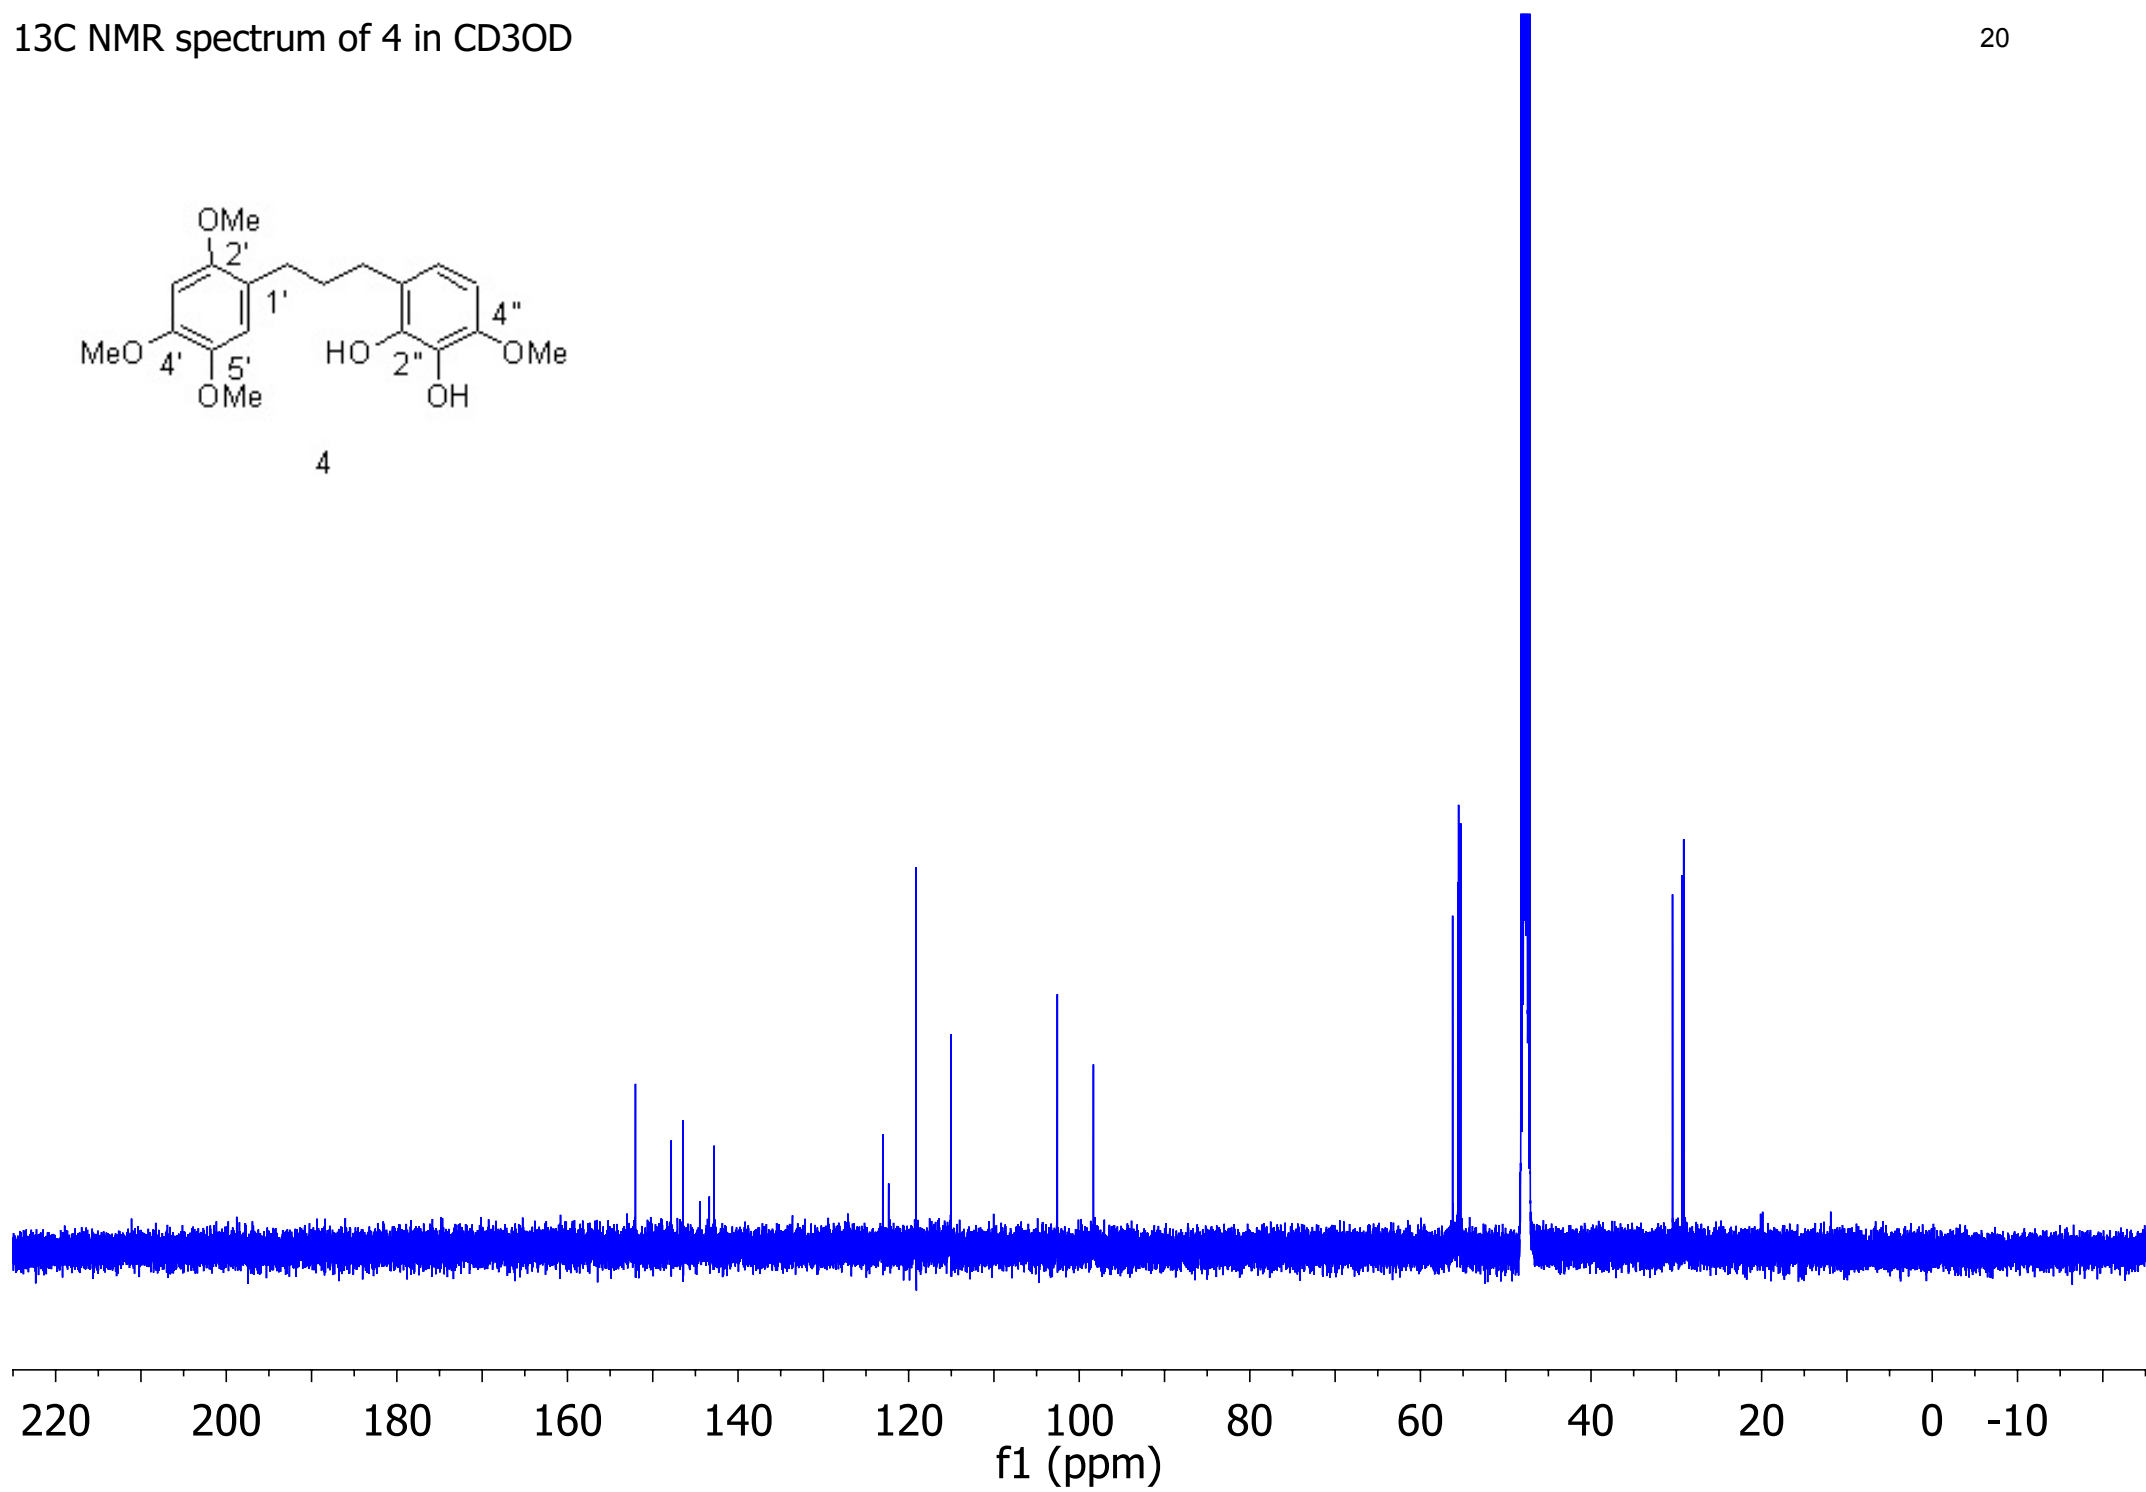

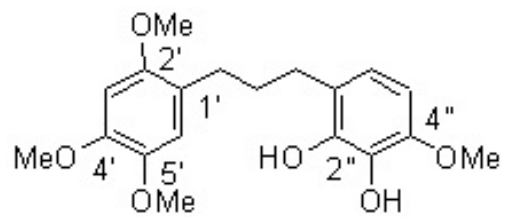

4

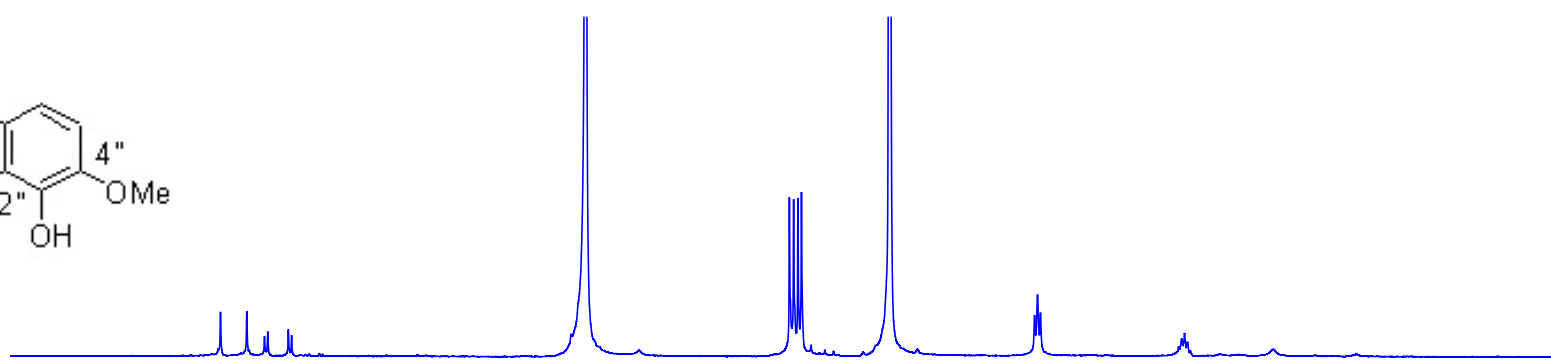COSY spectrum of compound 4 in CD<sub>3</sub>OD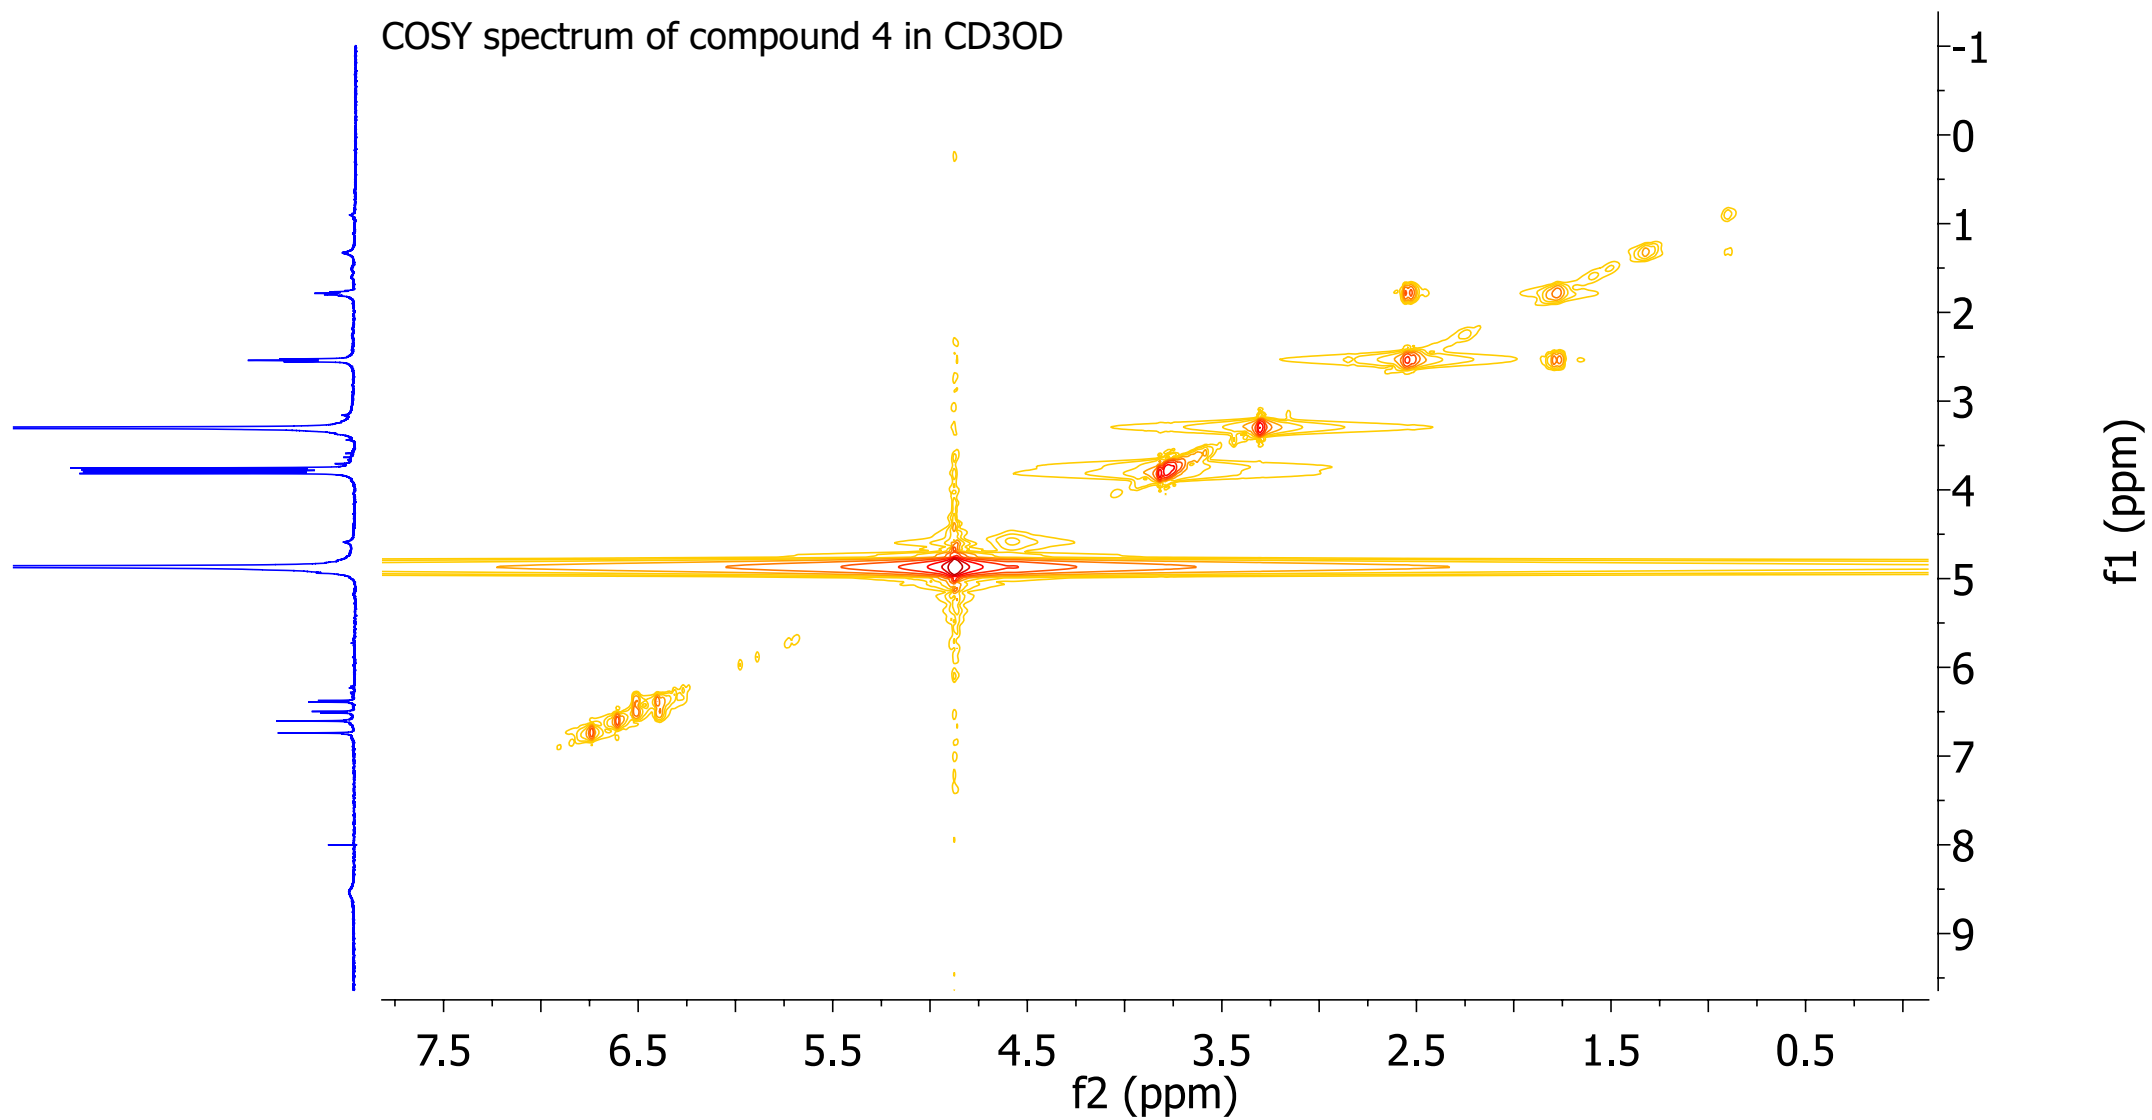

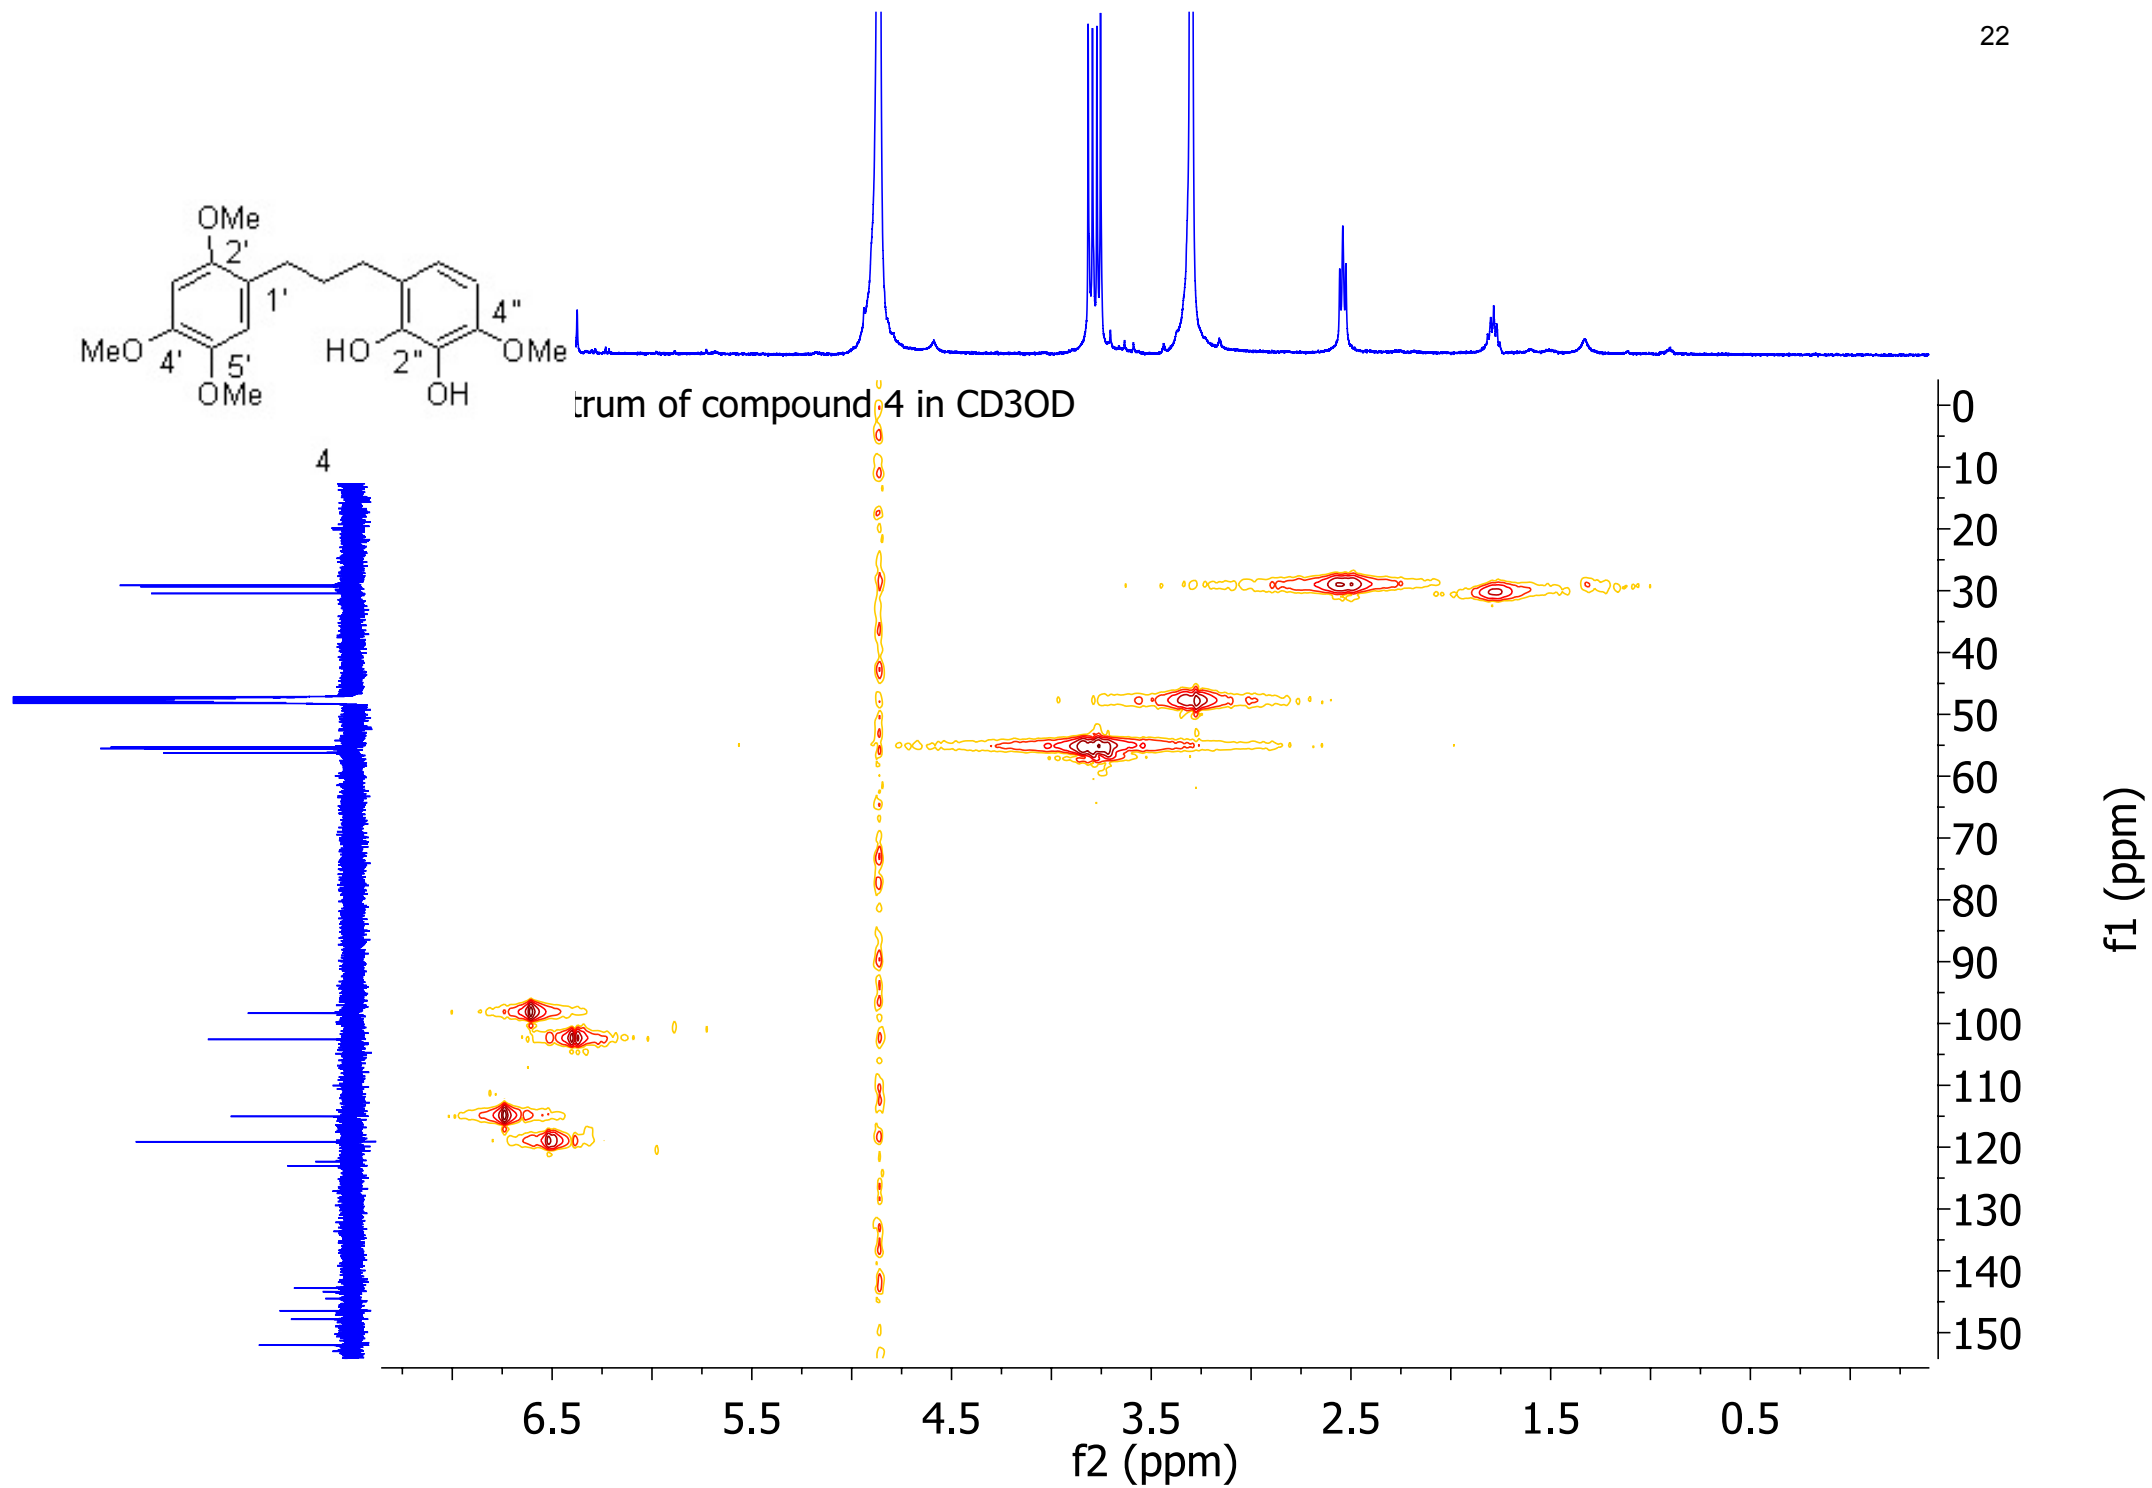

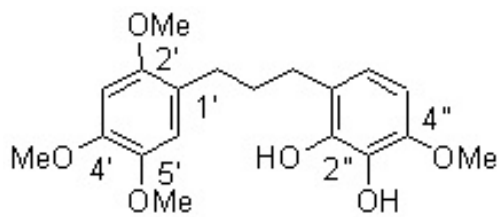

4

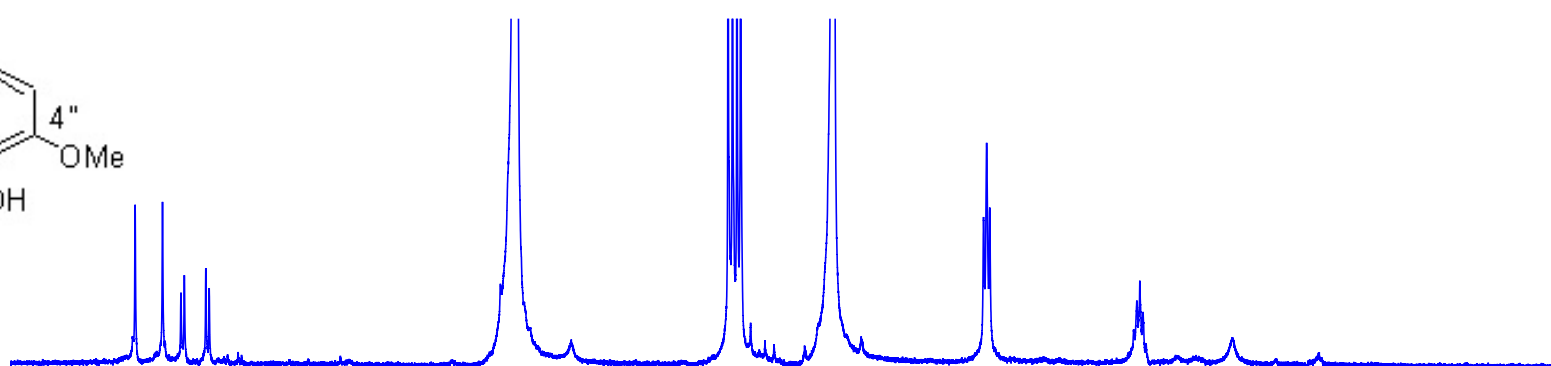HMBC spectrum of compound 4 in  $\text{CD}_3\text{OD}$ 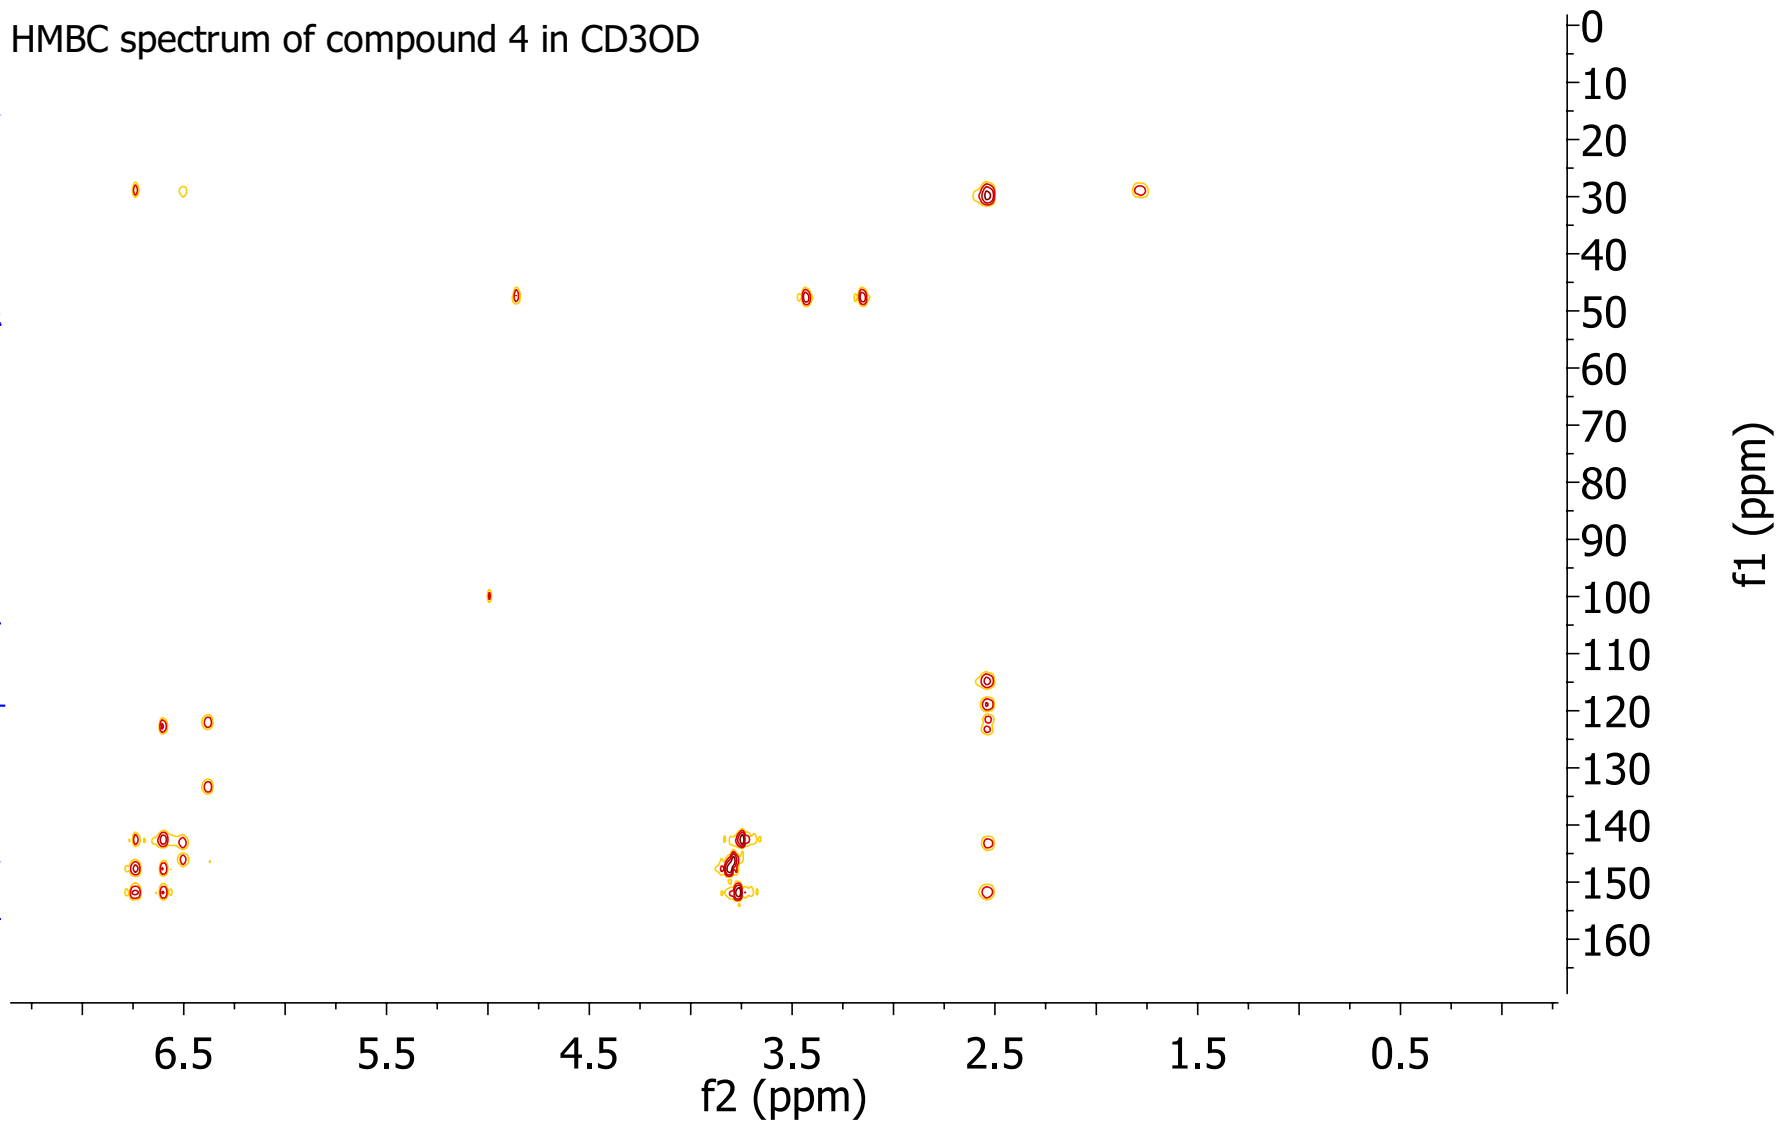

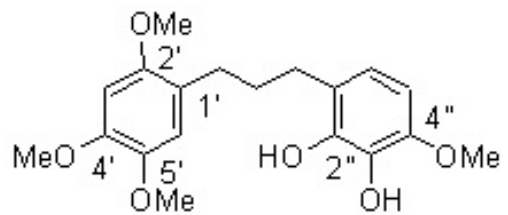

4

NOESY spectrum of compound 4 in CD<sub>3</sub>OD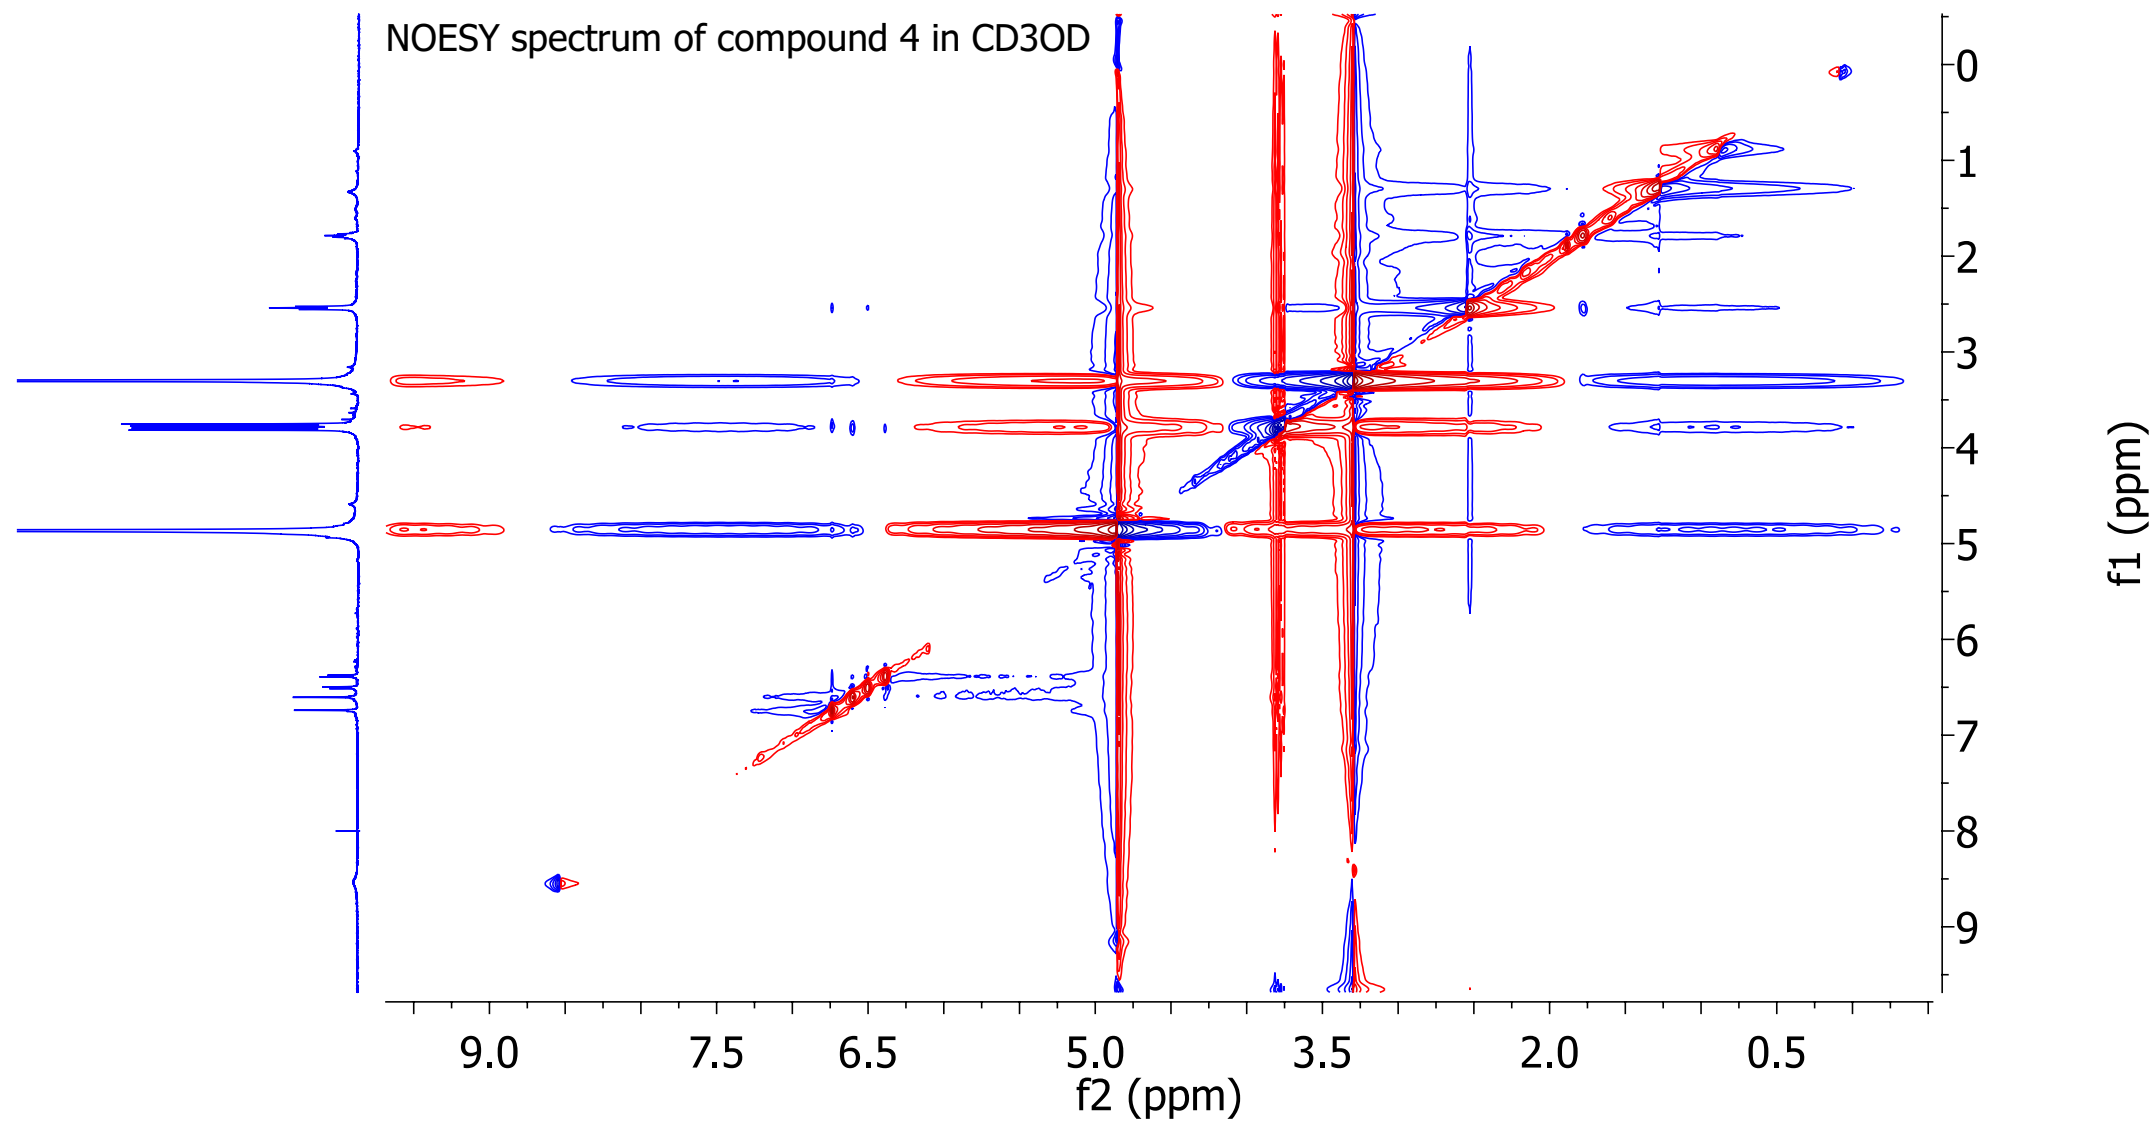



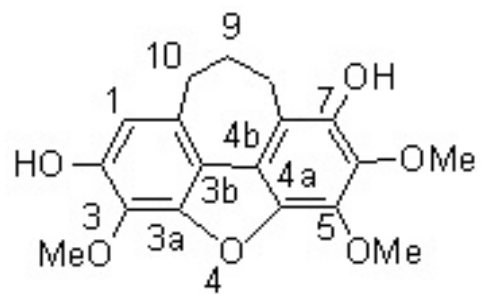COSY NMR spectrum of compound 5 in CD<sub>3</sub>OD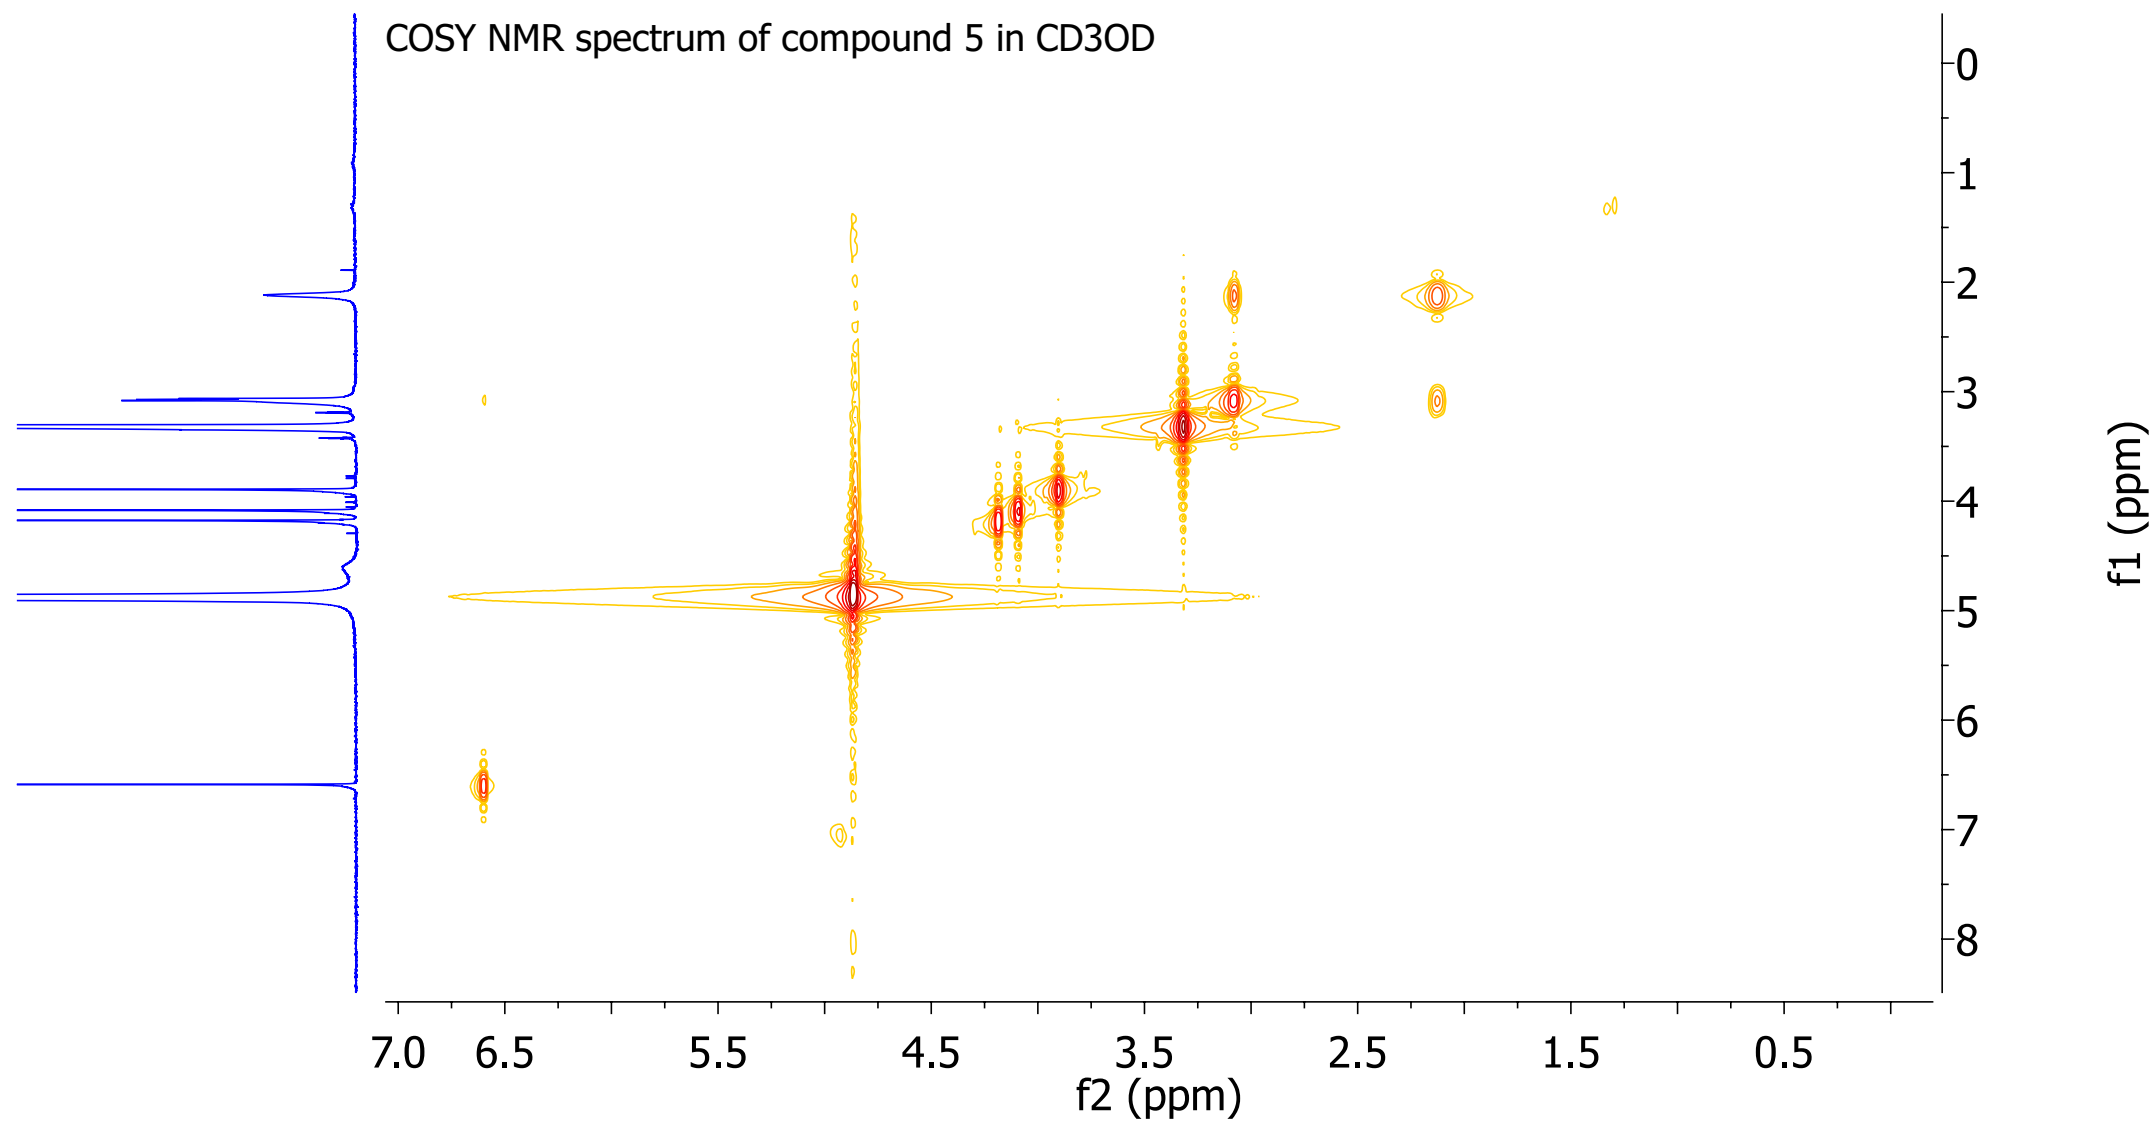

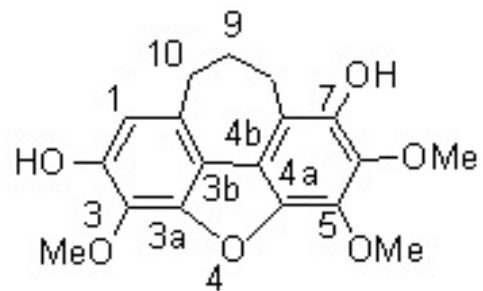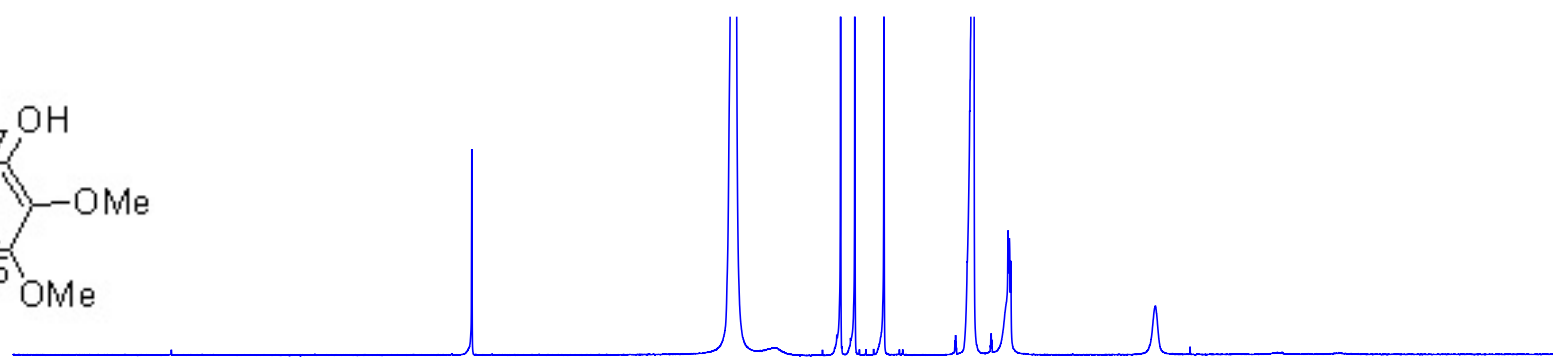HMQC NMR spectrum of compound 5 in  $\text{CD}_3\text{OD}$ 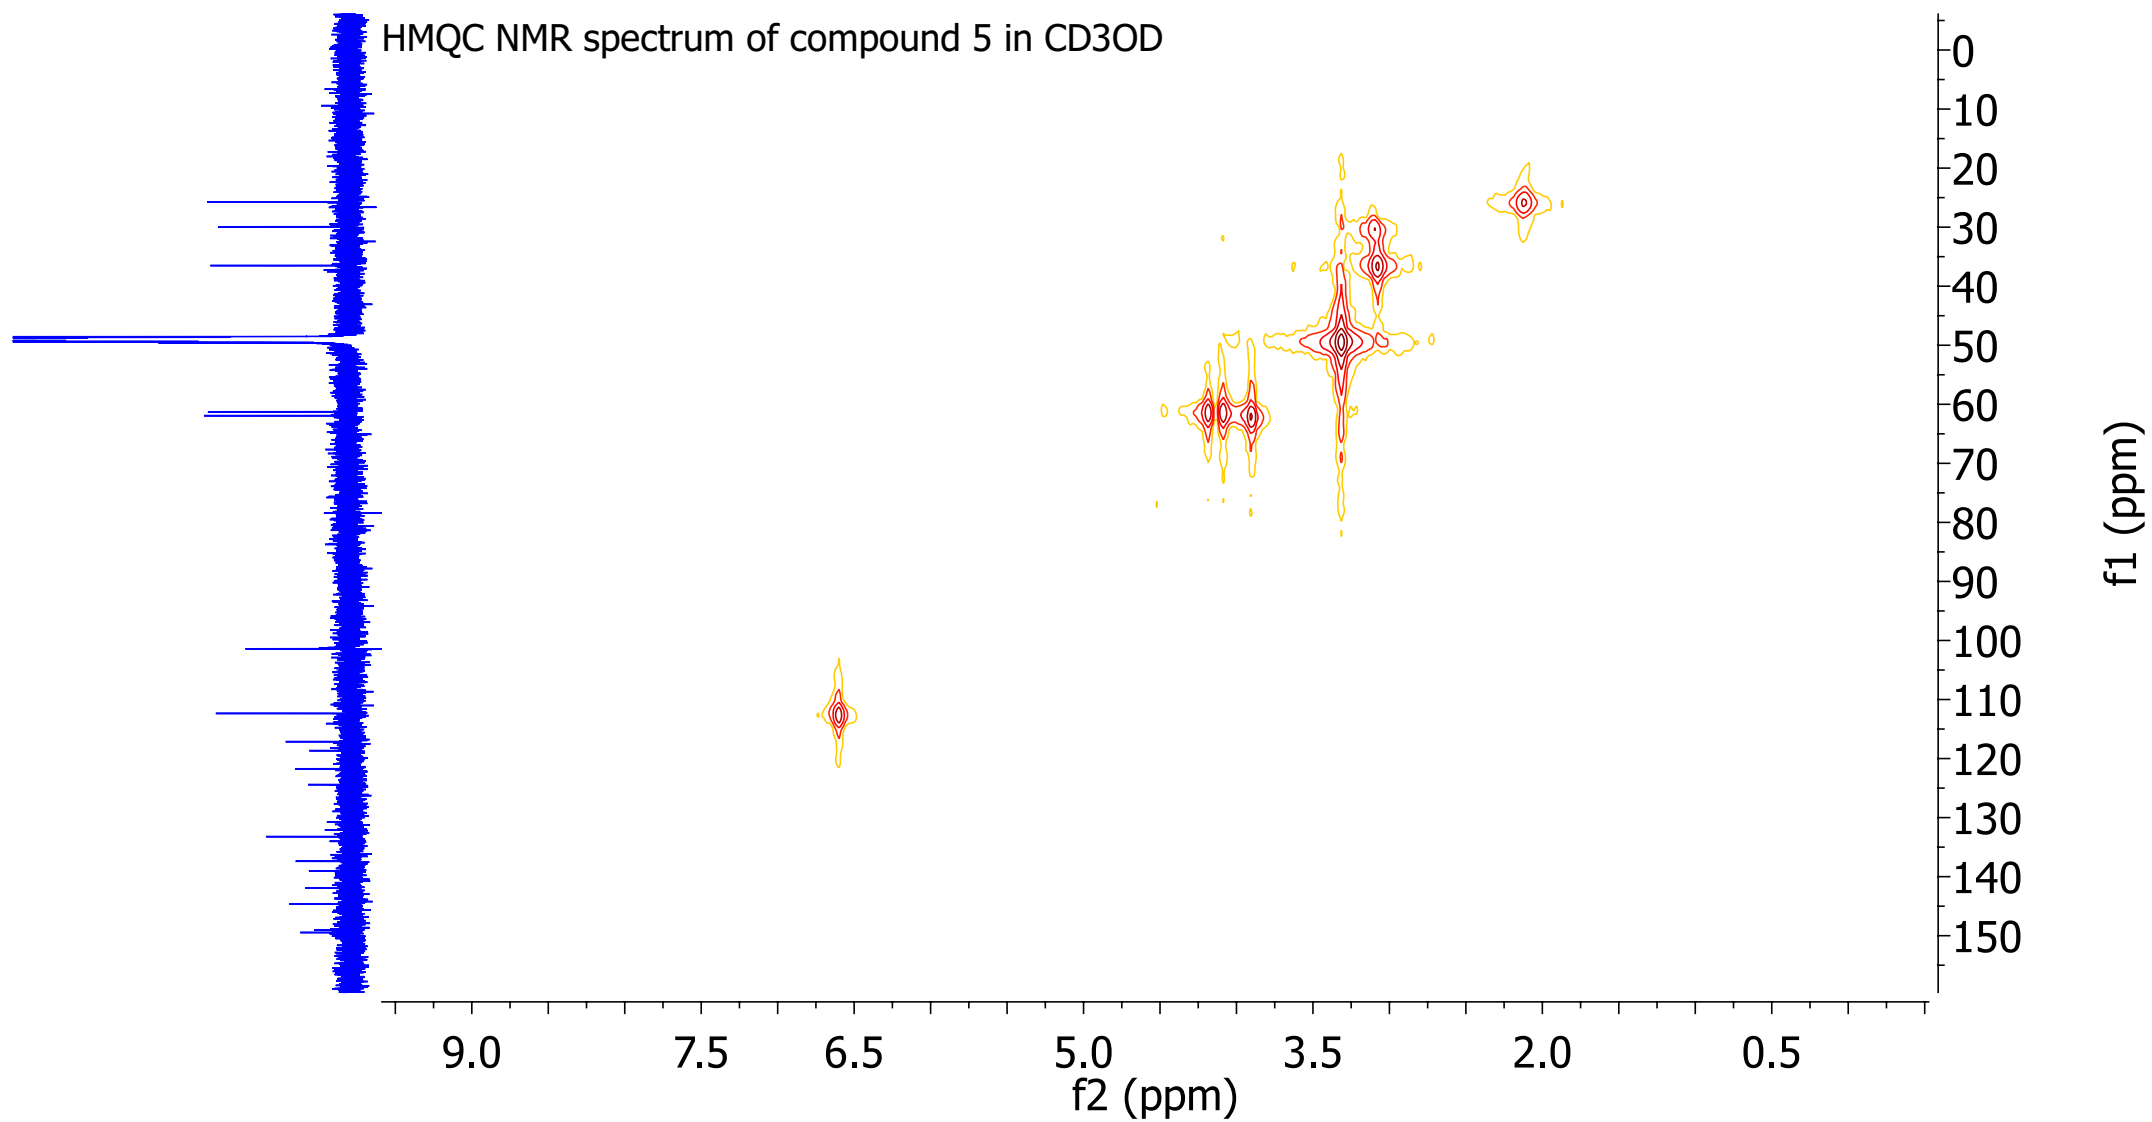

HMBC NMR spectrum of compound 5 in CD<sub>3</sub>OD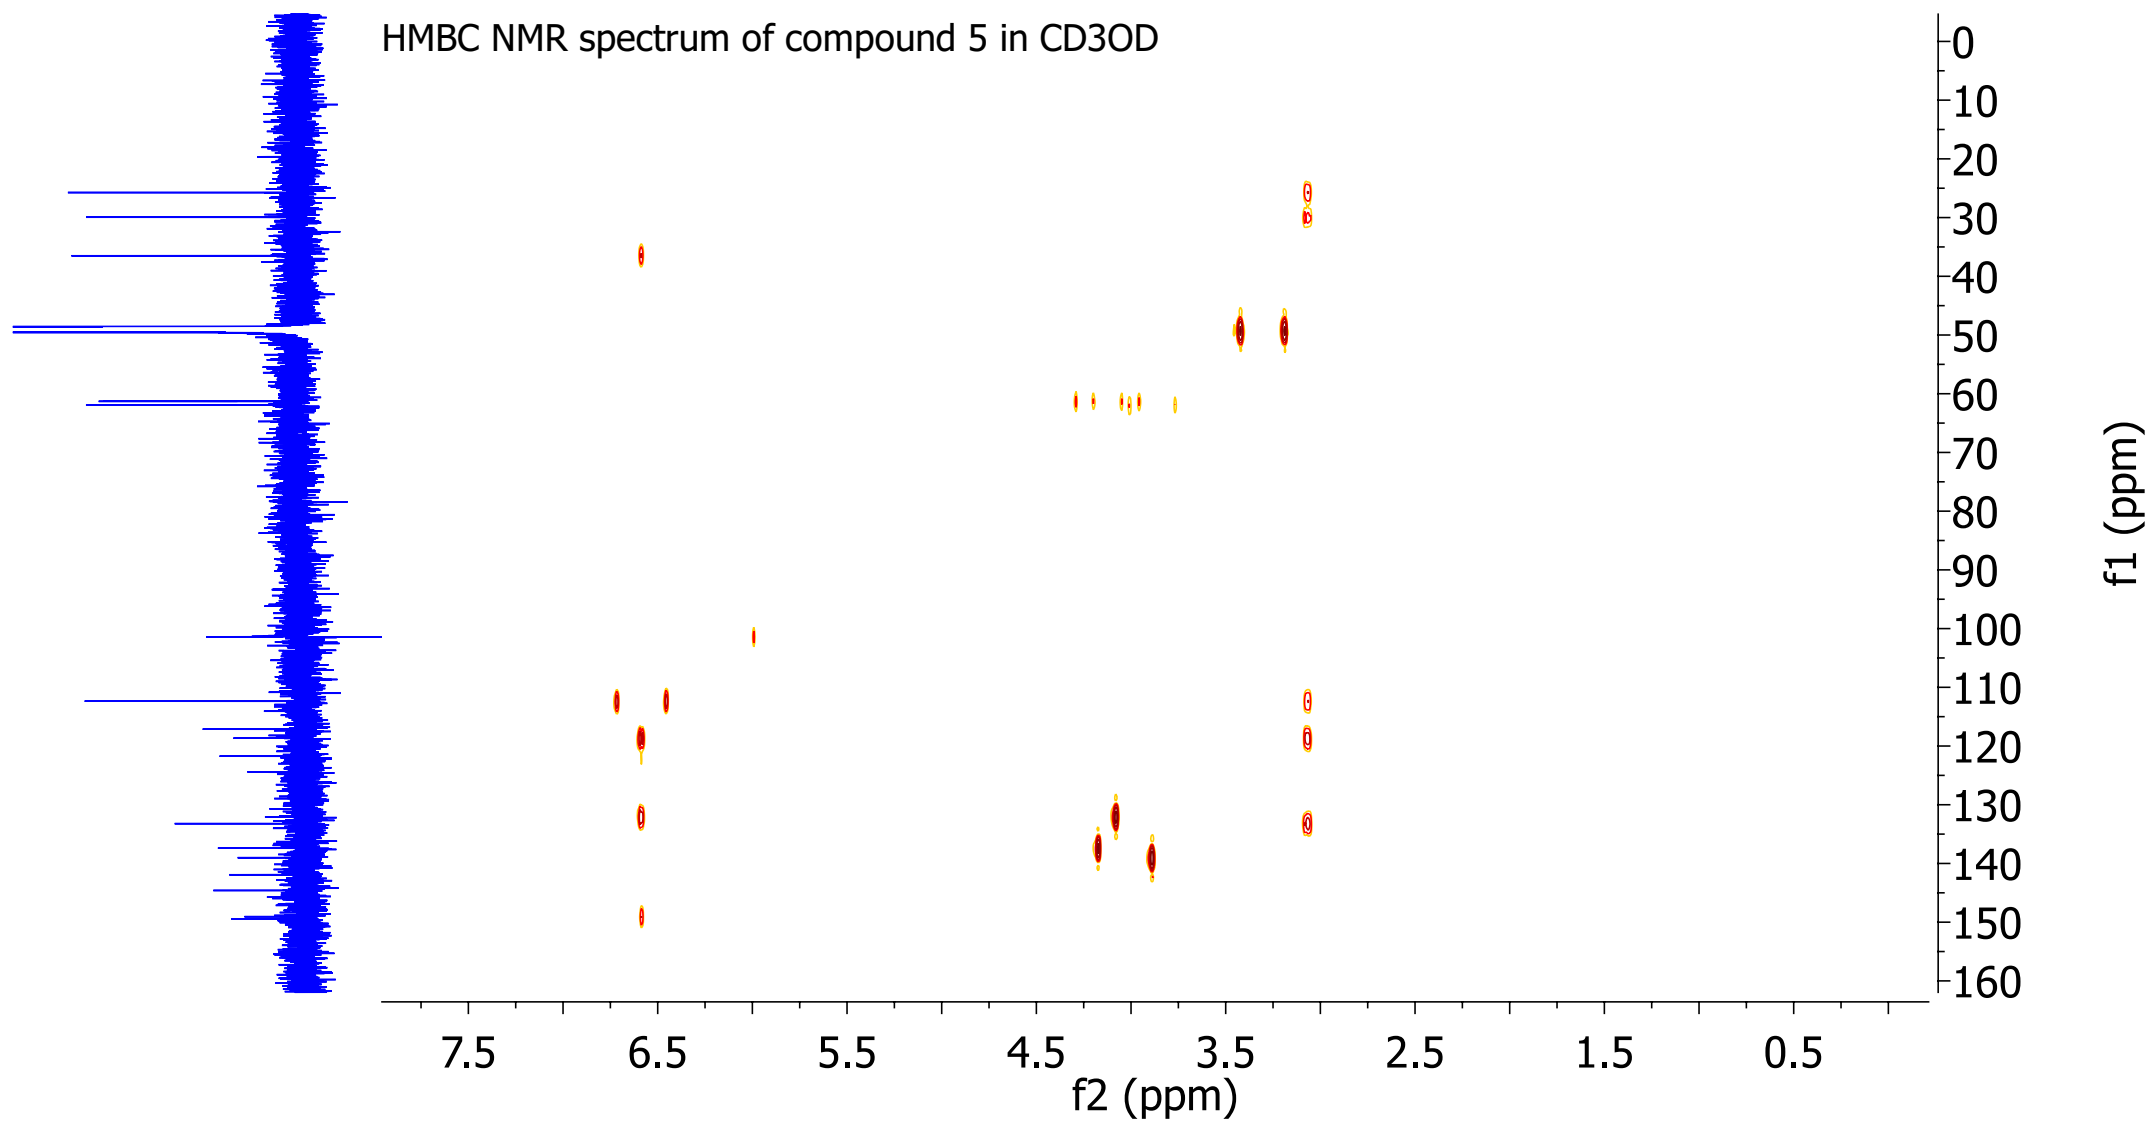

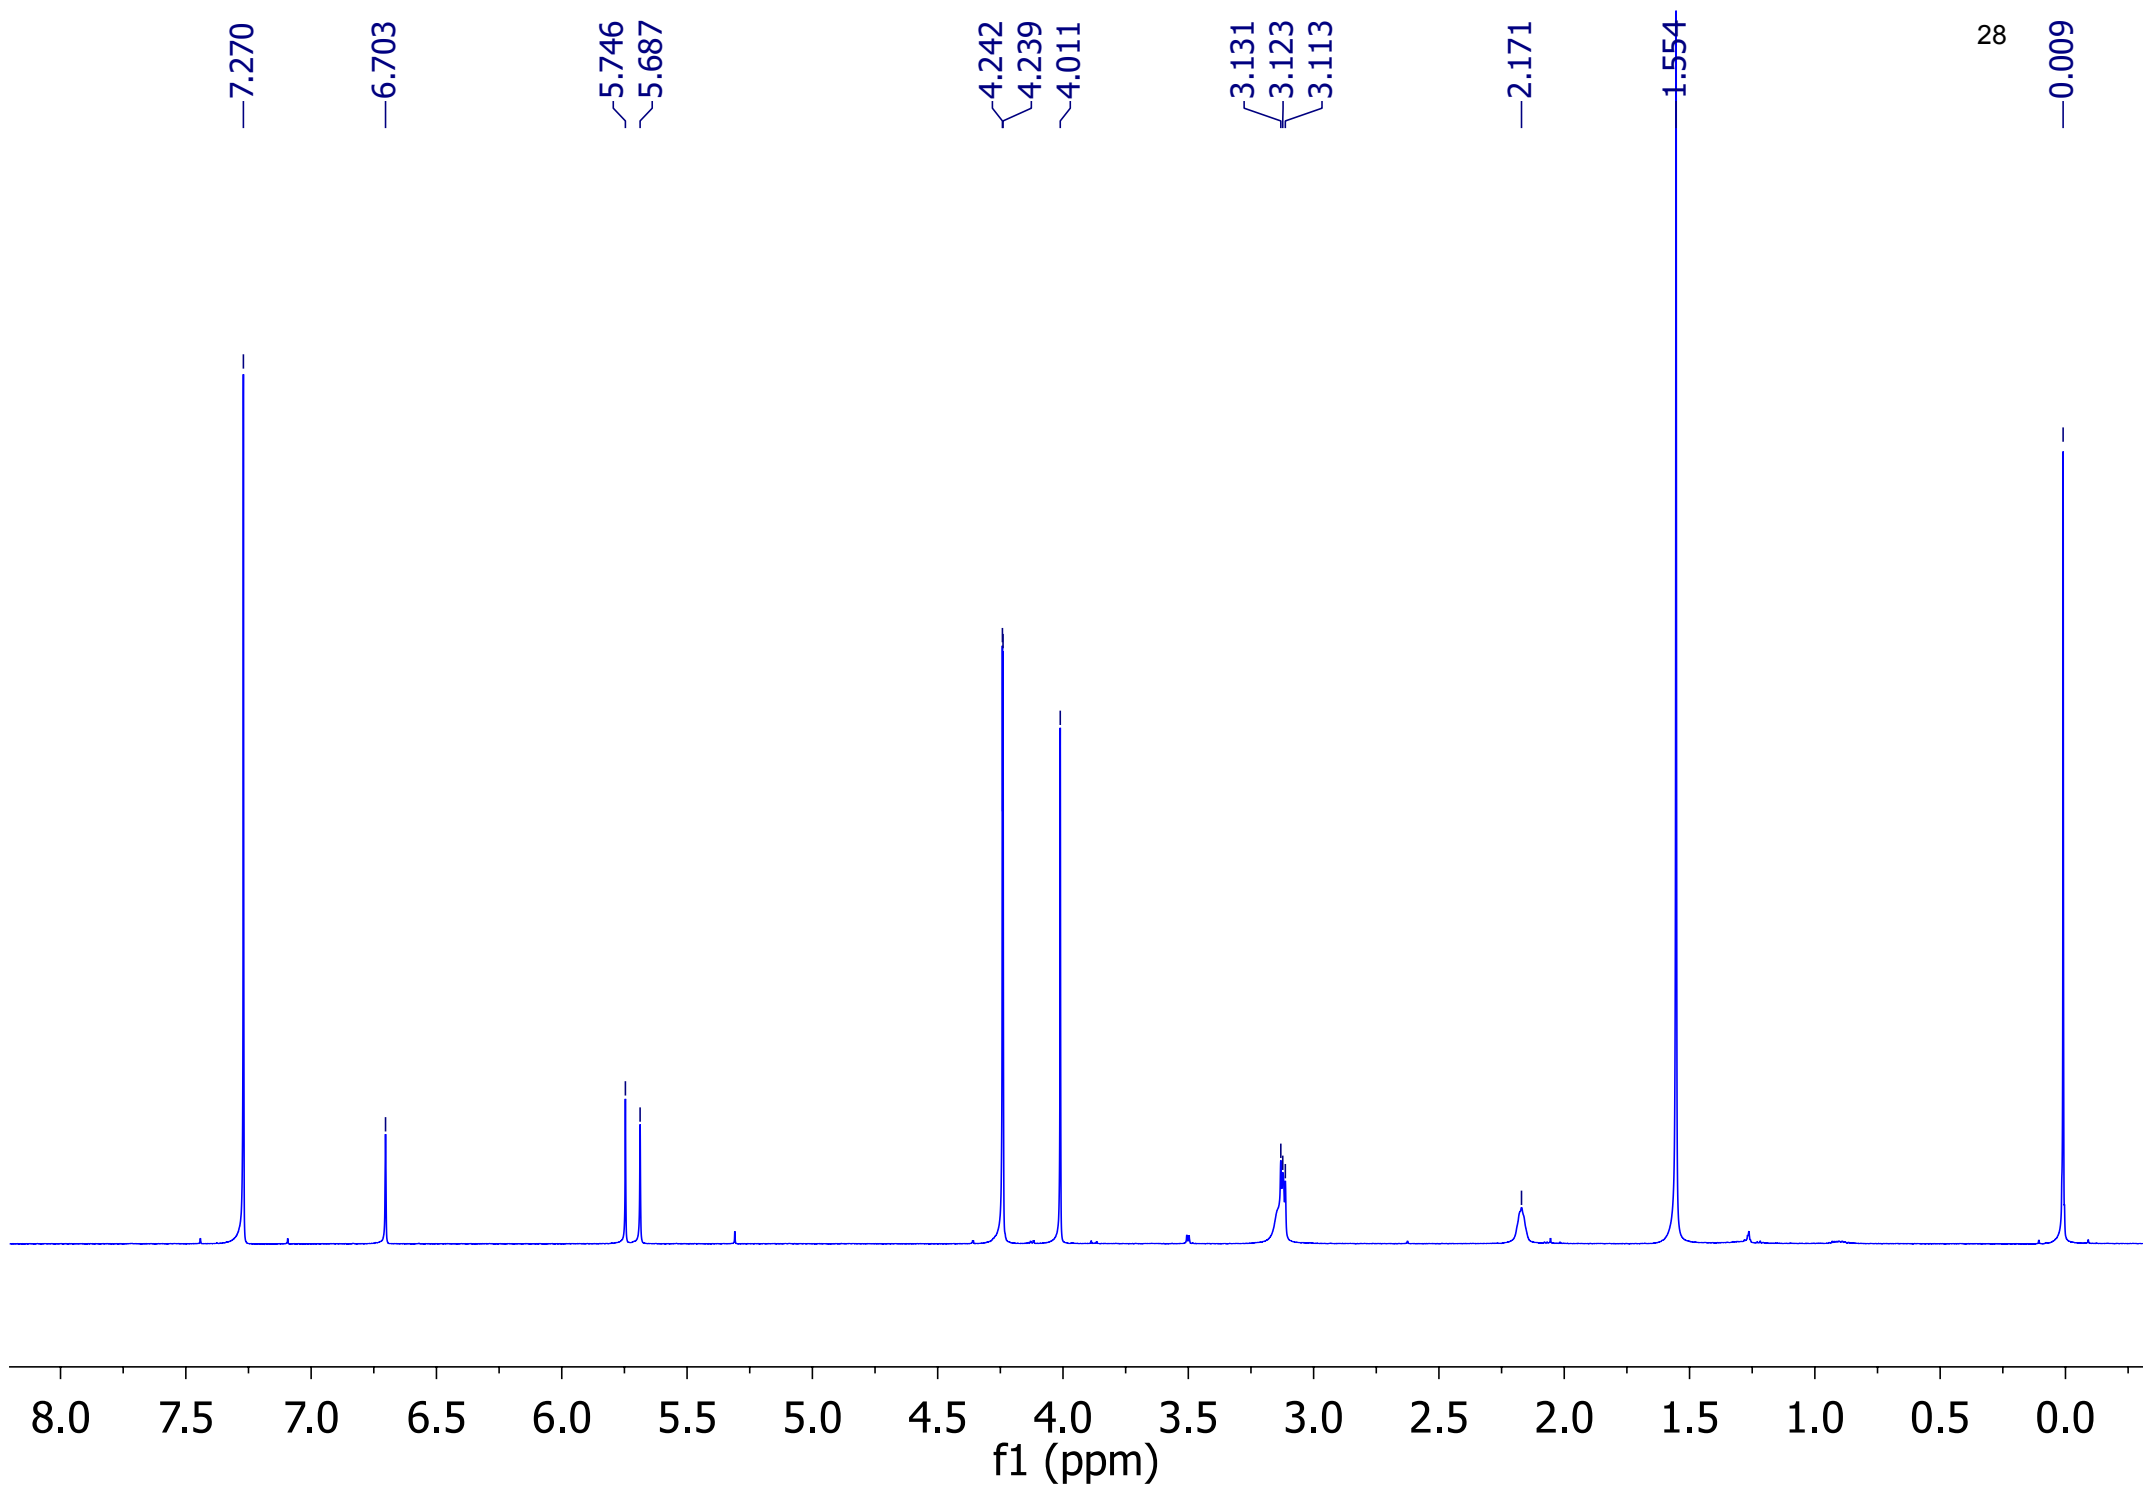

<sup>13</sup>C NMR spectrum of 5 in CDCl<sub>3</sub>

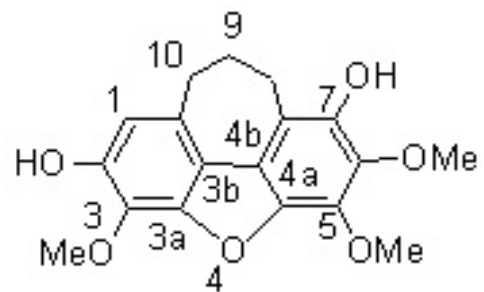

146.492  
146.196  
142.343  
140.690  
136.471  
135.574  
131.956  
129.688

77.212  
77.000  
76.789

61.735  
60.805

35.540  
28.670  
24.307

-0.017<sup>29</sup>

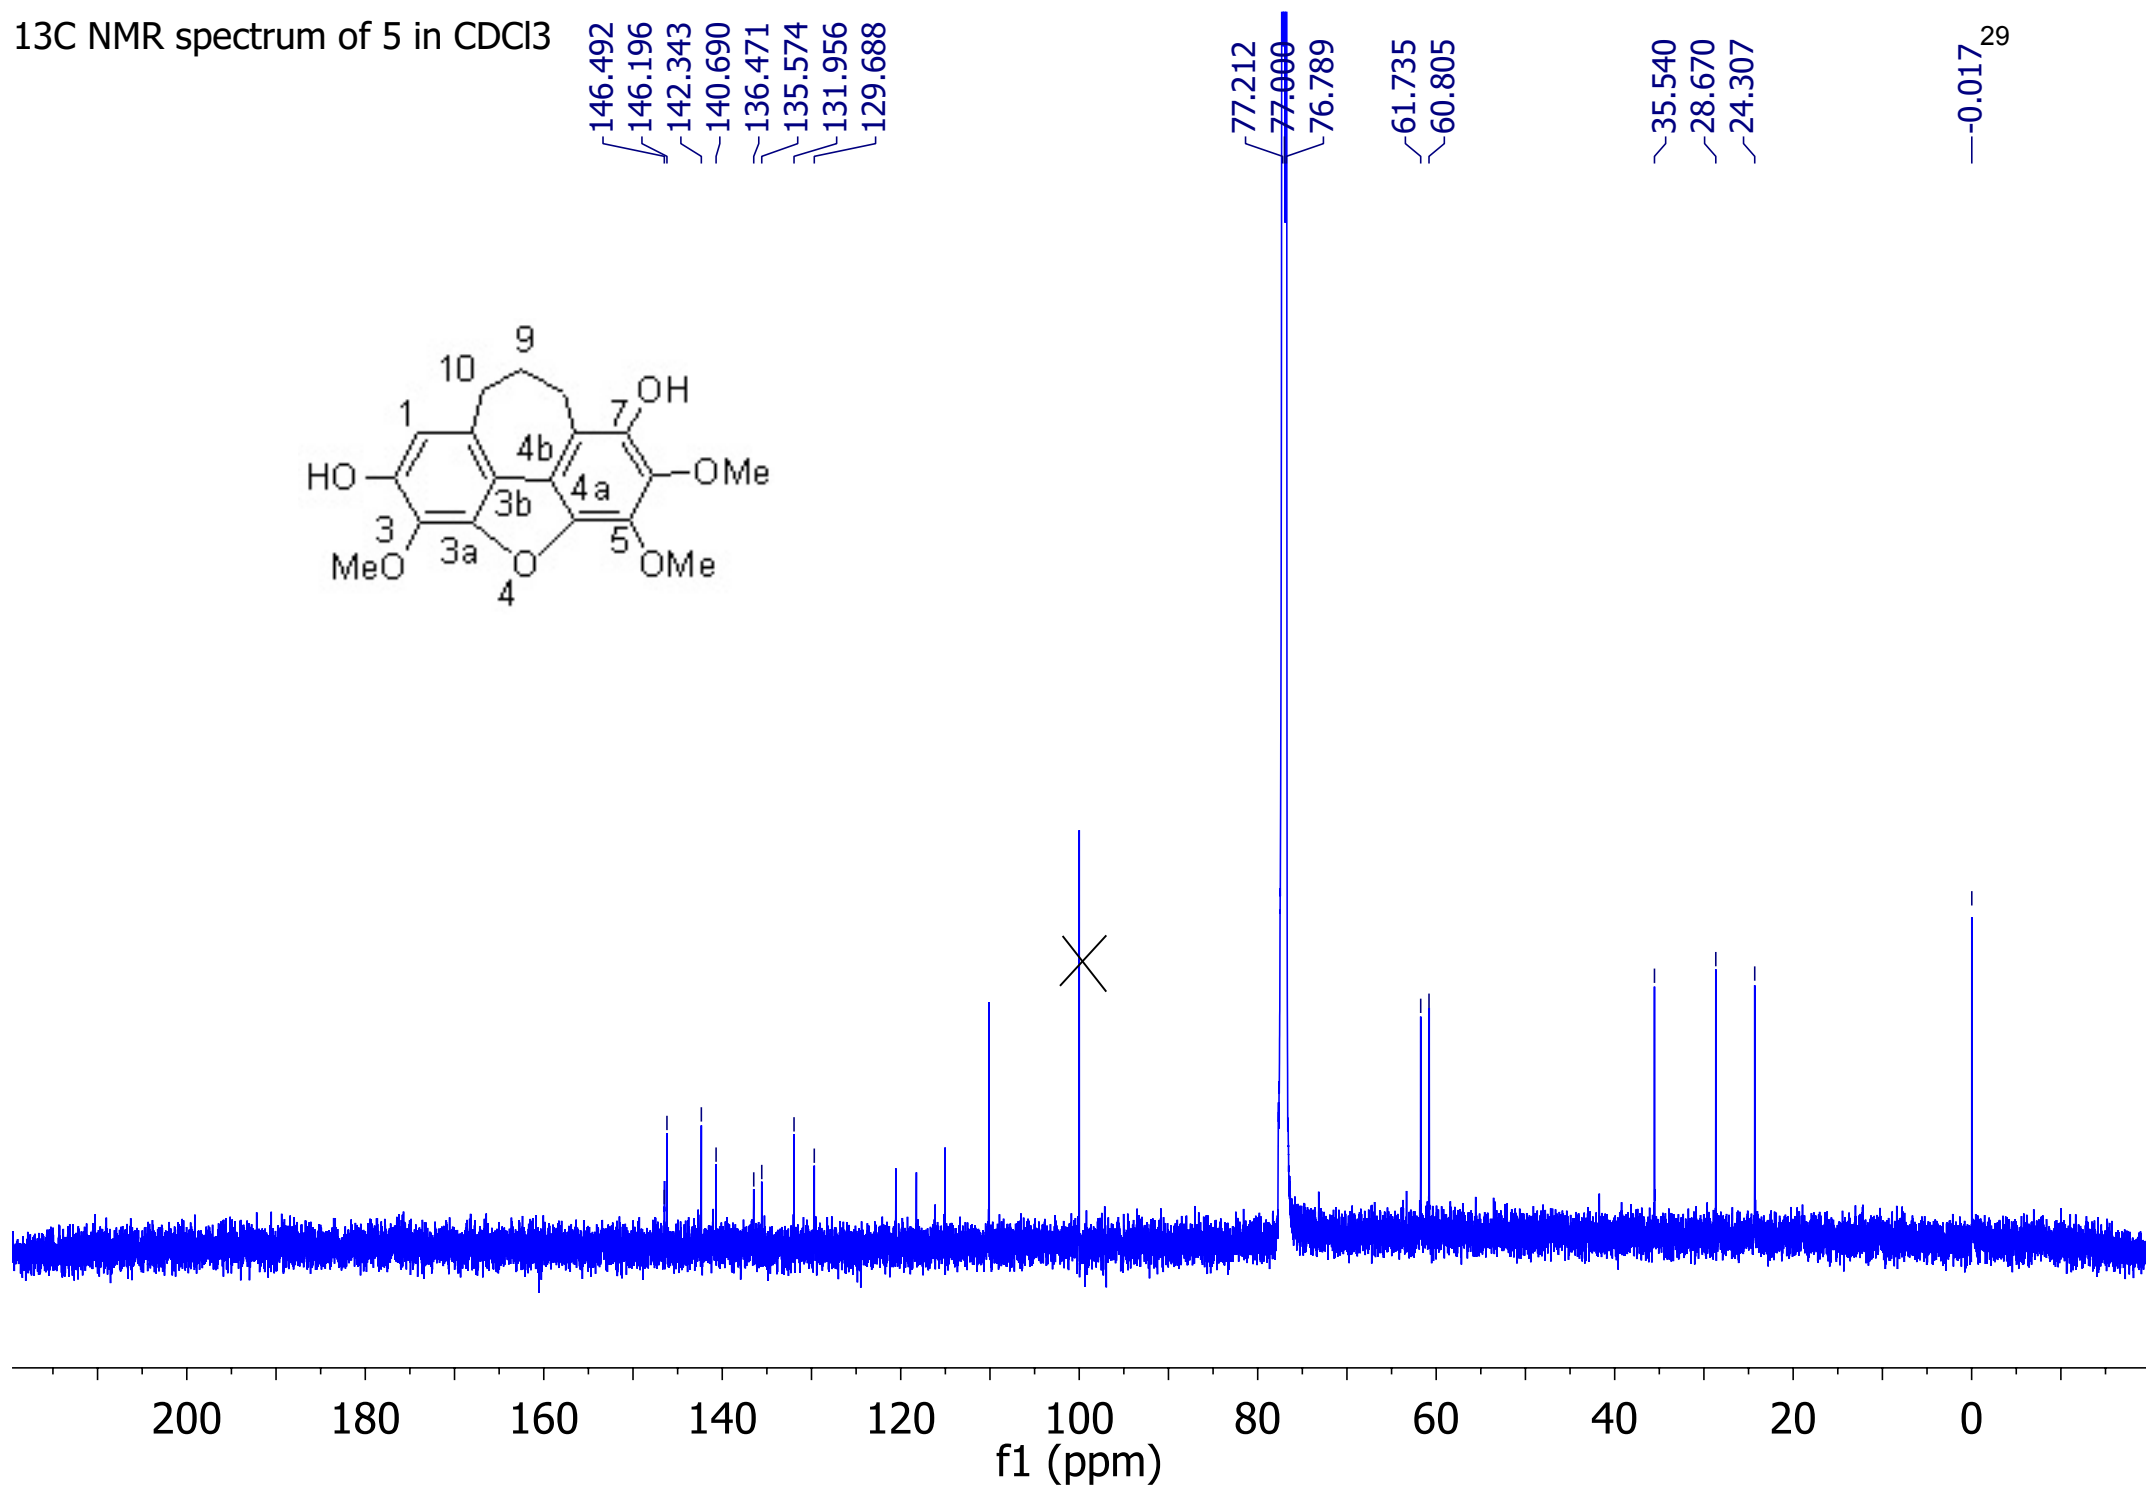

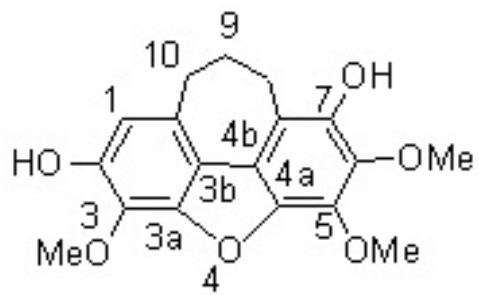

30

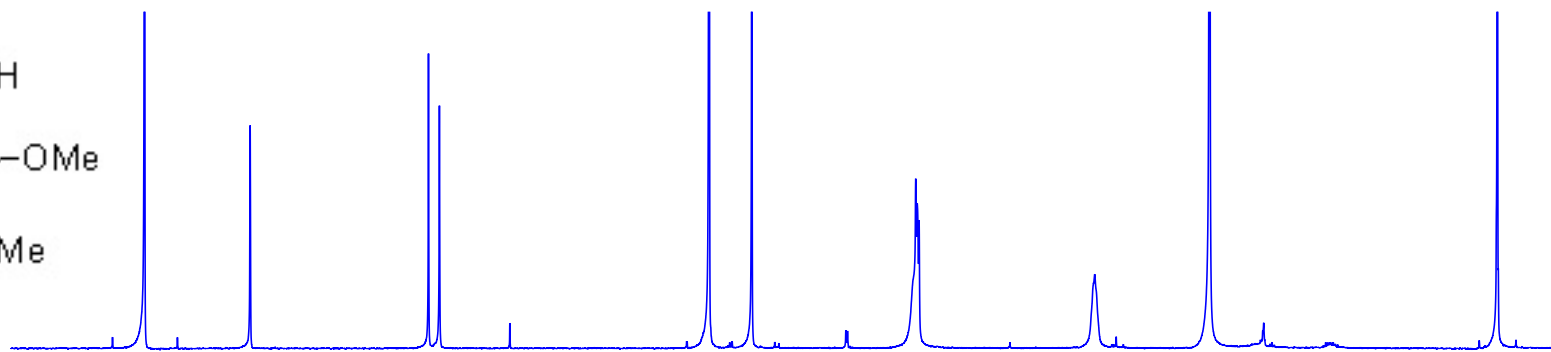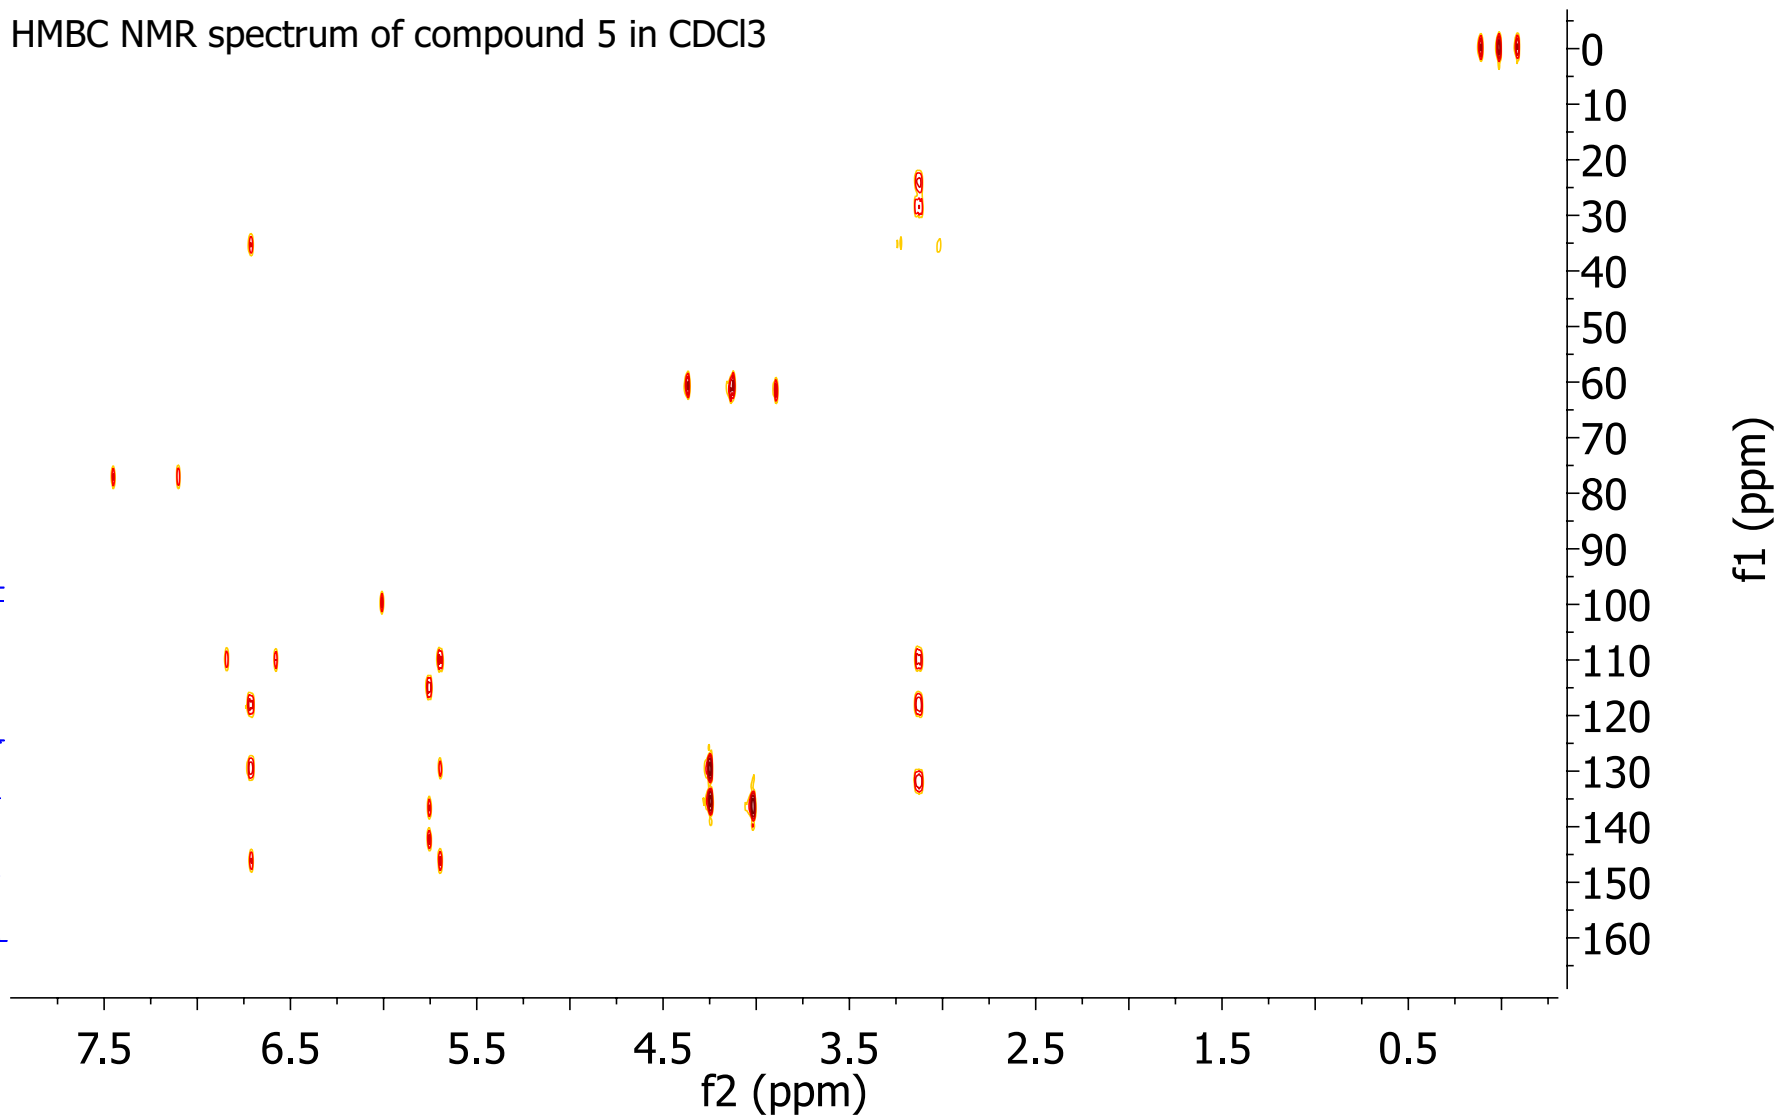

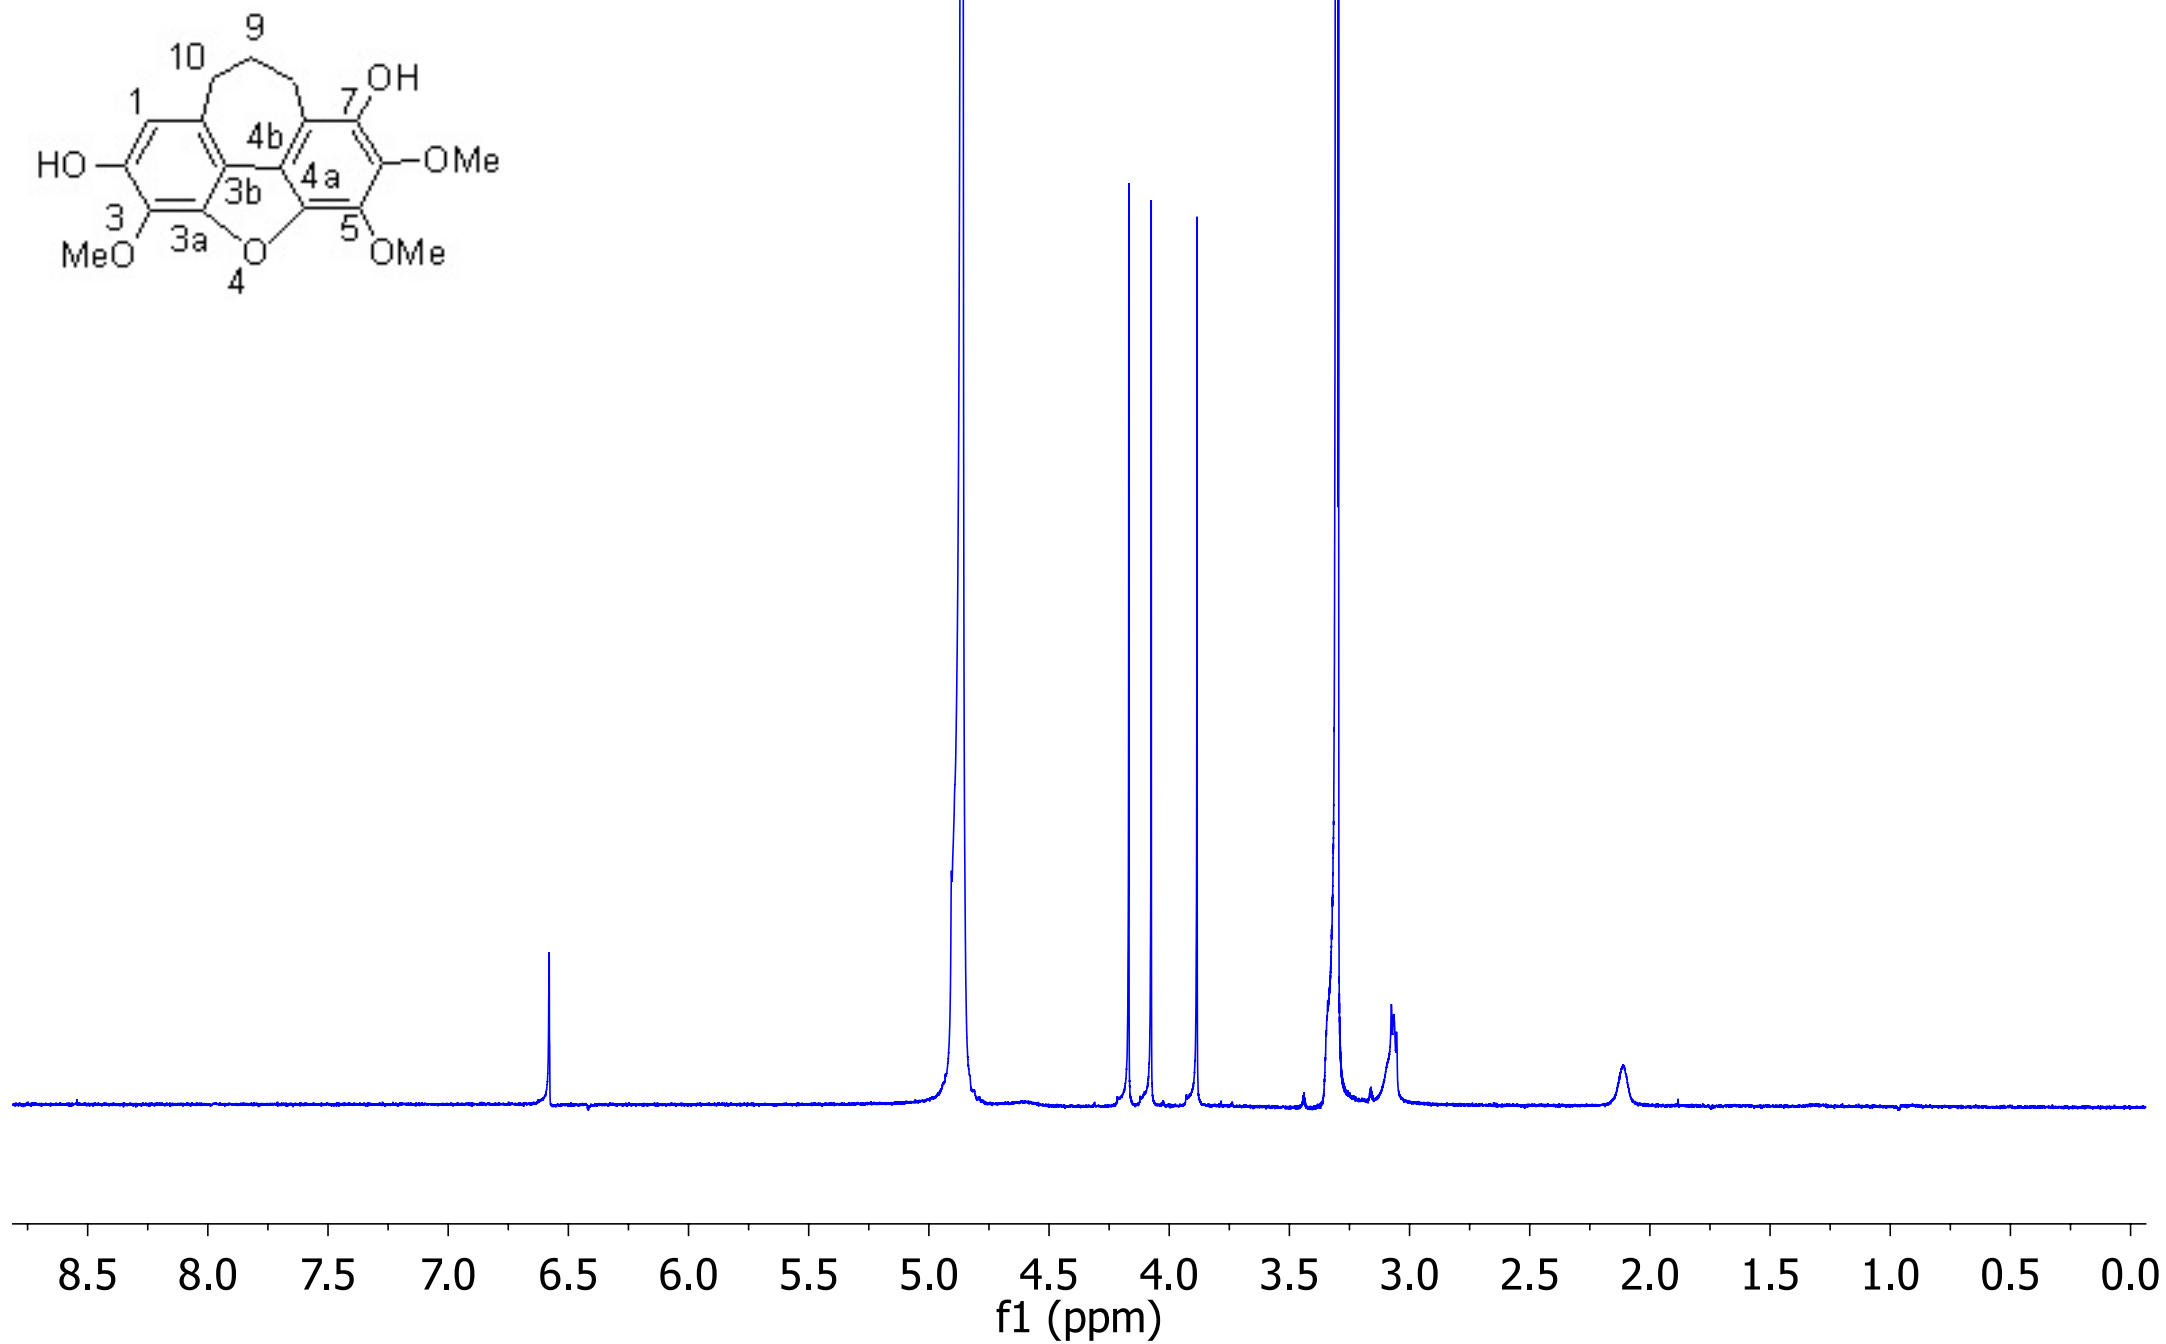

ep213-2-133-2 4 1 /opt/topspin/kingston endepan

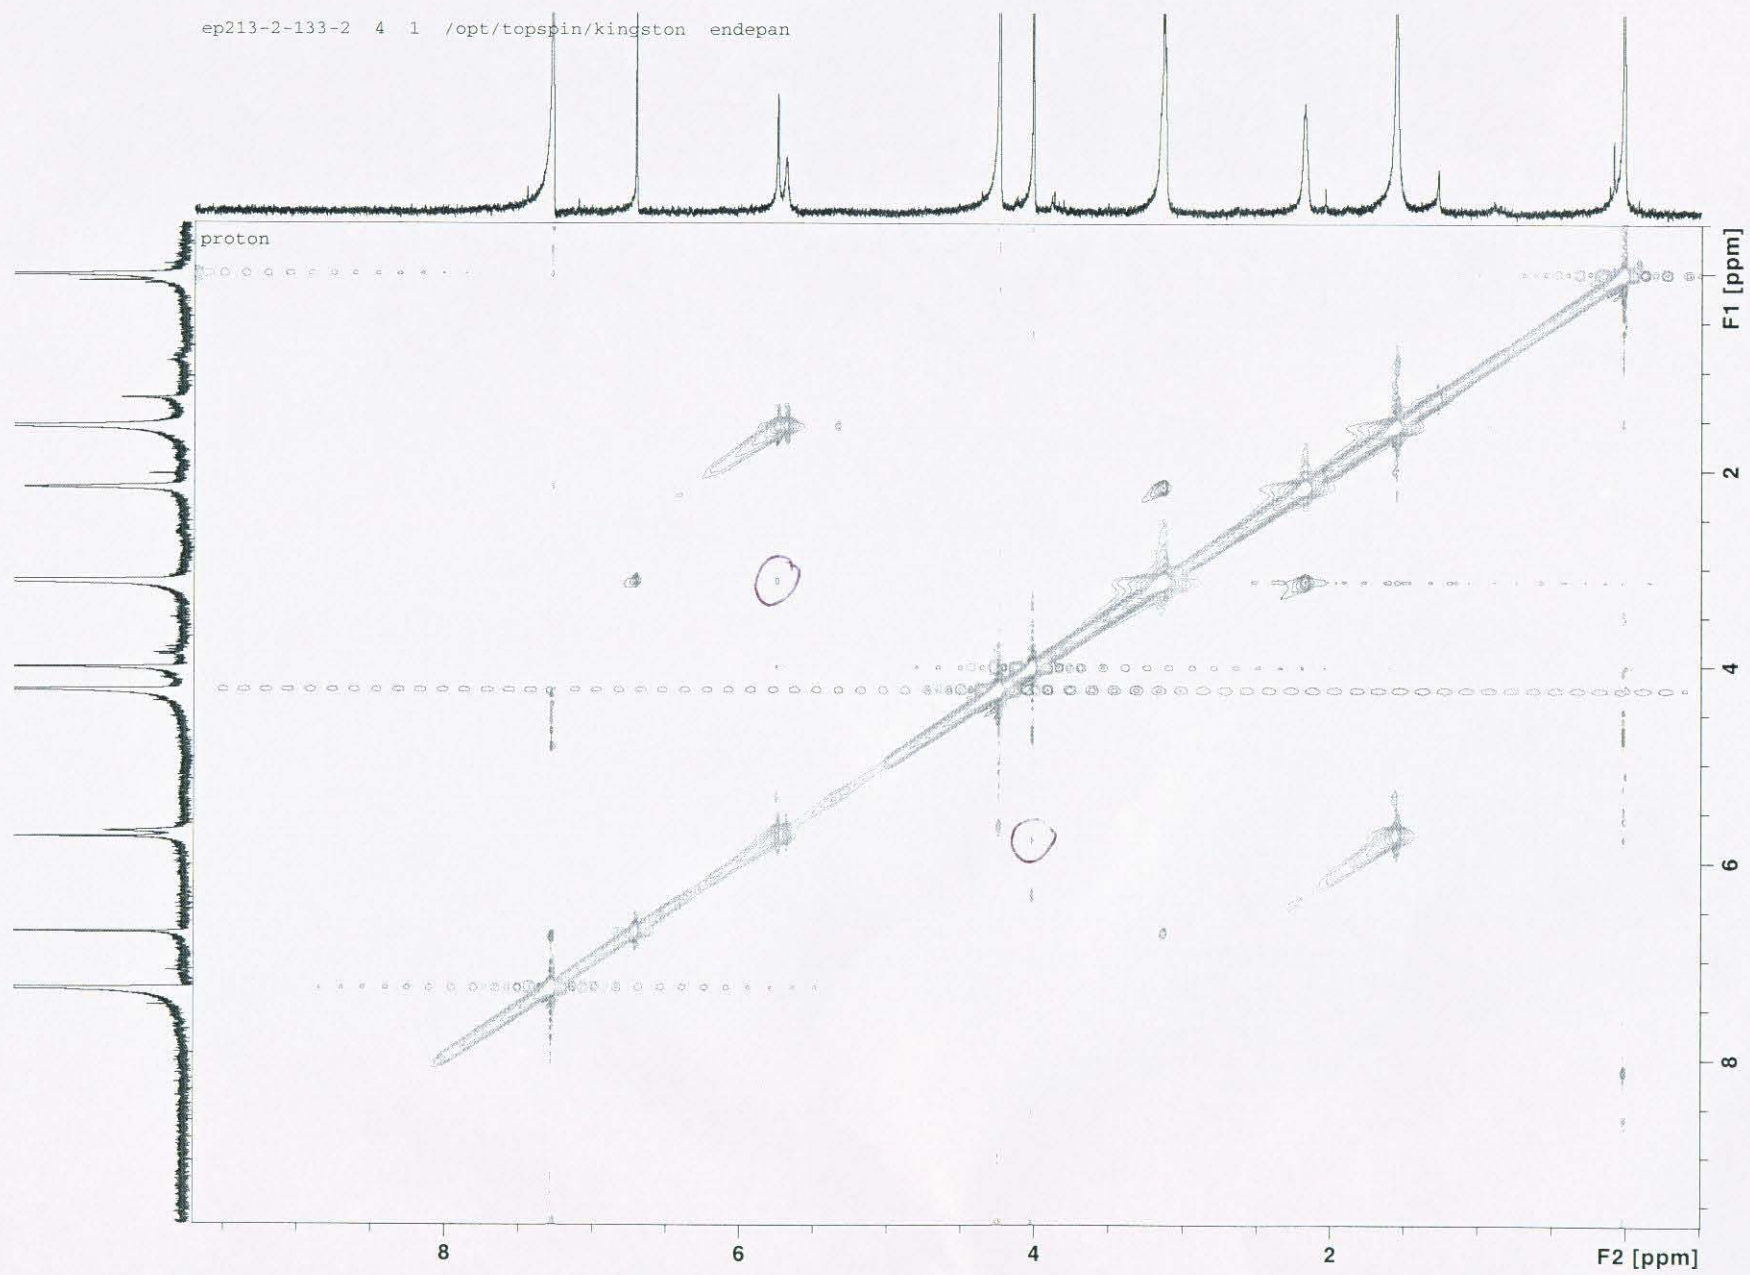

Supplement: NIHMS245302-supplement-1_si_001.pdf [file NIHMS245302-supplement-1_si_001.pdf]
